# Supplementary material for: The Collaborative Image of The City: Mapping the Inequality of Urban Perception
Source: PLoS One. 2013 Jul 24;8(7):e68400. doi: 10.1371/journal.pone.0068400 (PMC3722224; doi:10.1371/journal.pone.0068400)
Supplement: File S1 — Q scores. (XLS) [file pone.0068400.s001.xls]

## Sheet: Q_scores
Image ID	QS_Safer	Error_QS_Safer	QS_Unique	Error_QS_Unique	QS_Upperclass	Error_QS_Upperclass	Lat	Lon	City	Heading	Pitch	File_Location
1867	4.31208	0.528429	3.38884	0.231139	4.30724	0.472743	48.271	14.309	Linz	NULL	NULL	/images/id_1867_400_300.jpg
4447	7.4245	0.508995	8.57725	0.683006	6.49749	0.609597	42.3809	-71.0665	Boston	340	8	/images/id_4447_400_300.jpg
4026	4.96052	0.578983	3.79224	0.796483	5.43721	0.606079	40.8259	-73.9249	New York City	7	5	/images/id_4026_400_300.jpg
4027	6.94186	0.40726	6.6607	0.738466	5.87233	0.609209	40.7875	-73.9528	New York City	335	10	/images/id_4027_400_300.jpg
4024	6.35909	0.575126	6.28871	0.704695	6.47408	0.5962	40.7728	-73.9584	New York City	356	12	/images/id_4024_400_300.jpg
4025	4.85032	0.539608	4.67268	0.863409	5.08275	0.625513	40.6887	-73.8402	New York City	7	8	/images/id_4025_400_300.jpg
4022	6.70002	0.612473	4.58844	0.817333	5.22941	0.593083	40.7743	-73.9096	New York City	19	5	/images/id_4022_400_300.jpg
4023	5.63543	0.550703	5.66604	0.726695	5.79833	0.707291	40.82	-73.817	New York City	33	4	/images/id_4023_400_300.jpg
4020	6.81728	0.600107	5.54754	0.773982	6.27224	0.593658	40.7571	-73.962	New York City	325	5	/images/id_4020_400_300.jpg
4021	4.98943	0.546673	3.91037	0.67344	4.42094	0.550488	40.6075	-73.9923	New York City	332	6	/images/id_4021_400_300.jpg
4028	1.57189	0.577468	1.32196	0.704919	0.274323	0.643922	40.6754	-74.0143	New York City	336	0	/images/id_4028_400_300.jpg
4029	4.09803	0.614271	2.68779	0.746816	3.30226	0.539122	40.7724	-73.8999	New York City	20	4	/images/id_4029_400_300.jpg
2058	3.77155	0.403635	4.0731	0.530869	3.92376	0.475248	48.3183	14.2892	Linz	NULL	NULL	/images/id_2058_400_300.jpg
344	3.82295	0.455291	4.21573	0.832738	5.48768	0.486496	40.6776	-74.0099	New York City	253	4	/images/id_344_400_300.jpg
345	3.968	0.353119	3.83539	0.547846	4.34823	0.558666	40.6571	-73.9075	New York City	154	6	/images/id_345_400_300.jpg
346	3.84033	0.45892	5.67338	0.671064	4.06422	0.561872	40.6685	-73.8829	New York City	197	1	/images/id_346_400_300.jpg
347	4.21369	0.51424	3.56757	0.36629	4.05643	0.501499	40.6675	-73.8452	New York City	13	-1	/images/id_347_400_300.jpg
340	3.6486	0.57408	3.98079	0.517484	3.3372	0.393587	40.68	-73.9587	New York City	241	7	/images/id_340_400_300.jpg
341	5.24413	0.497486	4.07869	0.628159	5.07032	0.631277	40.5978	-73.9994	New York City	170	6	/images/id_341_400_300.jpg
3999	7.48474	0.521361	8.12746	0.846169	7.65248	0.492405	40.6859	-73.9864	New York City	328	7	/images/id_3999_400_300.jpg
343	4.69935	0.534763	4.24916	0.594081	5.29992	0.533373	40.6539	-73.9326	New York City	209	5	/images/id_343_400_300.jpg
3997	4.77161	0.496043	4.44817	0.609519	4.038	0.48946	40.6154	-73.9994	New York City	349	3	/images/id_3997_400_300.jpg
3996	2.79111	0.436442	2.95779	0.648792	1.36228	0.456489	40.6235	-73.9379	New York City	290	6	/images/id_3996_400_300.jpg
3995	3.72902	0.569829	3.10113	0.819533	2.45628	0.524766	40.7646	-73.9954	New York City	322	6	/images/id_3995_400_300.jpg
3994	4.62396	0.480335	3.74793	0.773373	4.16384	0.603408	40.6482	-73.9607	New York City	21	8	/images/id_3994_400_300.jpg
348	4.46236	0.497595	4.36681	0.714105	3.45822	0.513967	40.8234	-73.9264	New York City	200	6	/images/id_348_400_300.jpg
3992	4.50613	0.515264	4.86523	0.817521	5.29933	0.628801	40.6067	-73.9824	New York City	9	6	/images/id_3992_400_300.jpg
3991	5.08462	0.546478	2.41869	0.670878	5.11703	0.697095	40.7282	-73.8446	New York City	4	2	/images/id_3991_400_300.jpg
3990	5.7092	0.532355	5.12191	0.698086	4.73342	0.674845	40.7414	-73.9172	New York City	351	5	/images/id_3990_400_300.jpg
4686	1.61115	0.479414	2.1801	0.643354	0.095065	0.651655	42.3948	-71.0536	Boston	28	-1	/images/id_4686_400_300.jpg
4844	6.56216	0.556785	4.94622	0.768924	5.31923	0.567417	42.2901	-71.0552	Boston	24	8	/images/id_4844_400_300.jpg
4687	5.24549	0.519002	5.01761	0.742197	4.21017	0.600266	42.4016	-71.1328	Boston	254	3	/images/id_4687_400_300.jpg
966	4.97204	0.444182	4.23959	0.663704	3.52415	0.467598	42.3762	-71.1036	Boston	189	4	/images/id_966_400_300.jpg
967	5.61239	0.3691	4.85884	0.724995	6.42671	0.436809	42.3844	-71.1242	Boston	208	13	/images/id_967_400_300.jpg
2132	5.51089	0.459234	4.82804	0.858751	5.734	0.39997	48.3158	14.2772	Linz	NULL	NULL	/images/id_2132_400_300.jpg
2919	5.31188	0.461522	5.50516	0.782815	5.40043	0.620327	47.8008	13.0407	Salzburg	NULL	NULL	/images/id_2919_400_300.jpg
1653	5.09506	0.447686	5.31278	0.750098	5.60933	0.570564	48.29	14.2672	Linz	NULL	NULL	/images/id_1653_400_300.jpg
960	3.01599	0.221795	3.5738	0.39711	3.27569	0.25114	42.3313	-71.0707	Boston	179	4	/images/id_960_400_300.jpg
4683	6.066	0.496629	4.96848	0.660825	7.13182	0.657872	42.3377	-71.0979	Boston	350	-6	/images/id_4683_400_300.jpg
4732	4.02261	0.478624	4.38911	0.85314	4.67454	0.648385	42.383	-71.1195	Boston	323	-4	/images/id_4732_400_300.jpg
4733	6.78813	0.501886	4.48137	0.790785	4.98289	0.600531	42.3512	-71.1169	Boston	144	0	/images/id_4733_400_300.jpg
4730	6.64979	0.535916	6.73099	0.671851	5.53993	0.669025	42.3172	-71.068	Boston	352	4	/images/id_4730_400_300.jpg
4731	5.68539	0.560307	5.45851	0.759974	5.3428	0.65086	42.3742	-71.0338	Boston	0	4	/images/id_4731_400_300.jpg
4736	2.06351	0.530139	3.04683	0.793032	1.50169	0.531974	42.3696	-71.0378	Boston	329	3	/images/id_4736_400_300.jpg
4737	5.79793	0.537964	5.18891	0.795829	5.92845	0.659648	42.3219	-71.0506	Boston	40	-3	/images/id_4737_400_300.jpg
4734	4.29613	0.638976	3.45651	0.713921	3.51125	0.657581	42.3183	-71.083	Boston	330	10	/images/id_4734_400_300.jpg
4735	2.07837	0.449481	3.08109	0.665281	2.24041	0.378013	42.3246	-71.0698	Boston	4	2	/images/id_4735_400_300.jpg
4738	3.92789	0.538607	4.73817	0.749525	4.51392	0.709149	42.367	-71.1147	Boston	341	9	/images/id_4738_400_300.jpg
4739	6.26397	0.550701	7.31721	0.76825	7.31739	0.552824	42.3977	-71.1172	Boston	82	4	/images/id_4739_400_300.jpg
4527	7.82607	0.480318	7.36443	0.544915	7.21583	0.538914	42.3441	-71.1285	Boston	356	0	/images/id_4527_400_300.jpg
2184	3.48409	0.364296	3.64934	0.477589	3.32201	0.351229	48.3063	14.2718	Linz	NULL	NULL	/images/id_2184_400_300.jpg
298	5.41013	0.514844	6.81018	0.569681	3.29834	0.426051	40.7647	-73.9232	New York City	179	-2	/images/id_298_400_300.jpg
299	3.57121	0.329809	4.60397	0.784627	3.59082	0.51818	40.6959	-73.9722	New York City	307	3	/images/id_299_400_300.jpg
296	4.51148	0.509059	4.83023	0.814671	4.99853	0.560628	40.6364	-73.9854	New York City	161	3	/images/id_296_400_300.jpg
297	3.96487	0.422085	3.29856	0.220943	3.64086	0.479345	40.6786	-73.9159	New York City	129	4	/images/id_297_400_300.jpg
294	4.78131	0.495808	3.56563	0.445633	3.77927	0.575483	40.6706	-73.896	New York City	227	5	/images/id_294_400_300.jpg
295	6.28719	0.467782	5.05932	0.694379	6.18154	0.452109	40.7119	-73.8553	New York City	170	0	/images/id_295_400_300.jpg
292	4.18091	0.371425	5.8361	0.688868	4.58288	0.617889	40.6149	-73.9595	New York City	202	2	/images/id_292_400_300.jpg
293	5.27061	0.472218	5.85396	0.597459	6.32927	0.542349	40.6934	-73.9666	New York City	118	5	/images/id_293_400_300.jpg
290	3.08277	0.302139	4.91549	0.582769	3.21699	0.565988	40.6593	-73.9425	New York City	208	2	/images/id_290_400_300.jpg
291	4.43105	0.502158	4.41885	0.605442	5.25568	0.552888	40.7438	-73.9157	New York City	220	12	/images/id_291_400_300.jpg
3773	5.18737	0.636728	5.79045	0.750171	4.44441	0.640716	40.5978	-73.9994	New York City	15	8	/images/id_3773_400_300.jpg
3772	3.70163	0.50464	1.89608	0.63912	1.78742	0.567842	40.68	-73.9587	New York City	61	7	/images/id_3772_400_300.jpg
3771	3.54265	0.424781	5.1418	0.929691	3.49666	0.483793	40.7268	-73.8613	New York City	333	-2	/images/id_3771_400_300.jpg
3770	5.97757	0.504763	5.01405	0.741258	6.08142	0.608656	40.6128	-73.9873	New York City	340	1	/images/id_3770_400_300.jpg
3777	3.97706	0.538532	4.62058	0.739102	2.76085	0.636642	40.6685	-73.8829	New York City	17	1	/images/id_3777_400_300.jpg
3776	4.35861	0.545865	2.81736	0.70258	3.73765	0.604531	40.6571	-73.9075	New York City	334	6	/images/id_3776_400_300.jpg
3775	2.66609	0.541479	3.00088	0.710102	3.79229	0.702331	40.6539	-73.9326	New York City	29	5	/images/id_3775_400_300.jpg
3774	4.93533	0.537037	4.40293	0.712414	4.8218	0.731374	40.6563	-73.9215	New York City	237	2	/images/id_3774_400_300.jpg
4523	3.53714	0.579732	4.70195	0.755569	3.85785	0.67236	42.3055	-71.0708	Boston	59	3	/images/id_4523_400_300.jpg
3779	5.45673	0.581632	2.69063	0.647392	6.44014	0.580601	40.8234	-73.9264	New York City	350	6	/images/id_3779_400_300.jpg
3778	3.00415	0.433164	3.6334	0.711167	1.96894	0.571498	40.6675	-73.8452	New York City	215	9	/images/id_3778_400_300.jpg
4522	6.8686	0.522859	5.251	0.748233	6.34828	0.628618	42.3661	-71.1259	Boston	356	0	/images/id_4522_400_300.jpg
4655	4.77376	0.515456	5.75783	0.675093	4.84879	0.654307	42.3024	-71.0679	Boston	33	0	/images/id_4655_400_300.jpg
4654	5.71602	0.630933	4.75616	0.793595	3.36814	0.5688	42.3585	-71.1449	Boston	325	0	/images/id_4654_400_300.jpg
4657	6.89176	0.497082	8.81963	0.716463	7.70623	0.532171	42.2883	-71.0682	Boston	121	4	/images/id_4657_400_300.jpg
4656	7.33772	0.502128	7.12218	0.744194	7.92242	0.627989	42.3169	-71.1108	Boston	352	13	/images/id_4656_400_300.jpg
4651	5.34173	0.502992	3.75893	0.754822	5.55201	0.638867	42.3907	-71.1297	Boston	327	2	/images/id_4651_400_300.jpg
4650	6.21716	0.440841	6.47421	0.617006	6.72431	0.48826	42.2872	-71.0677	Boston	26	0	/images/id_4650_400_300.jpg
276	5.85282	0.463007	4.12891	0.582481	4.76553	0.564923	40.8867	-73.9136	New York City	35	10	/images/id_276_400_300.jpg
4652	6.77075	0.495147	5.67446	0.841293	6.38094	0.606942	42.3359	-71.05	Boston	271	-2	/images/id_4652_400_300.jpg
278	6.22294	0.429511	5.82158	0.617459	6.36366	0.509597	40.7429	-73.8794	New York City	279	6	/images/id_278_400_300.jpg
279	4.50518	0.426579	6.47291	0.470584	4.83492	0.508682	40.7384	-73.8725	New York City	222	0	/images/id_279_400_300.jpg
4836	7.64004	0.587983	6.00873	0.696669	7.04468	0.517614	42.3291	-71.1191	Boston	17	12	/images/id_4836_400_300.jpg
4659	5.99202	0.582166	3.97023	0.744624	4.59306	0.733094	42.339	-71.049	Boston	358	0	/images/id_4659_400_300.jpg
4658	2.67134	0.599176	2.43497	0.663452	2.34492	0.342552	42.3903	-71.0333	Boston	19	6	/images/id_4658_400_300.jpg
583	5.74114	0.553064	6.47624	0.528045	7.63453	0.356595	40.6859	-73.9864	New York City	148	7	/images/id_583_400_300.jpg
581	5.3377	0.563596	4.17936	0.677435	4.72407	0.49591	40.6154	-73.9994	New York City	169	3	/images/id_581_400_300.jpg
642	6.4903	0.407741	5.30809	0.702568	6.04013	0.501694	40.6044	-74.0131	New York City	169	-3	/images/id_642_400_300.jpg
2188	6.10691	0.428216	6.82473	0.54249	6.41751	0.418746	48.3092	14.2768	Linz	NULL	NULL	/images/id_2188_400_300.jpg
2262	4.17068	0.435695	5.59243	0.660273	5.5399	0.644732	48.3003	14.2873	Linz	NULL	NULL	/images/id_2262_400_300.jpg
2263	4.67247	0.565232	4.55554	0.824345	5.35589	0.477154	48.3	14.2872	Linz	NULL	NULL	/images/id_2263_400_300.jpg
2260	5.58779	0.476011	5.38542	0.617016	7.21499	0.346679	48.3008	14.2903	Linz	NULL	NULL	/images/id_2260_400_300.jpg
2261	6.8029	0.490032	7.68423	0.475275	6.50968	0.478204	48.3003	14.2878	Linz	NULL	NULL	/images/id_2261_400_300.jpg
2266	5.12104	0.436934	7.45293	0.347016	6.35971	0.528913	48.2997	14.2823	Linz	NULL	NULL	/images/id_2266_400_300.jpg
2264	4.126	0.481291	5.27074	0.680939	4.7106	0.679804	48.3	14.2872	Linz	NULL	NULL	/images/id_2264_400_300.jpg
2265	4.6953	0.446089	3.86259	0.724986	5.83062	0.446343	48.2992	14.285	Linz	NULL	NULL	/images/id_2265_400_300.jpg
2189	4.60877	0.554231	4.44553	0.558979	3.72496	0.527109	48.308	14.2803	Linz	NULL	NULL	/images/id_2189_400_300.jpg
108	5.89827	0.503015	5.19604	0.742117	6.68443	0.36154	40.6359	-74.029	New York City	163	8	/images/id_108_400_300.jpg
109	6.06063	0.435979	6.49135	0.630391	5.61825	0.578032	40.7976	-73.9313	New York City	258	-1	/images/id_109_400_300.jpg
102	4.23826	0.491964	4.38425	0.566352	3.89347	0.567757	40.7664	-73.9306	New York City	239	2	/images/id_102_400_300.jpg
103	5.88941	0.451093	4.11101	0.581755	5.59518	0.533157	40.6521	-73.9439	New York City	23	0	/images/id_103_400_300.jpg
100	6.43386	0.374895	3.79407	0.671132	6.01403	0.626222	40.7572	-73.9623	New York City	143	9	/images/id_100_400_300.jpg
101	4.4782	0.47529	3.58717	0.528643	5.29173	0.598236	40.7053	-73.8237	New York City	205	-3	/images/id_101_400_300.jpg
106	4.24785	0.490607	3.56768	0.442168	4.10439	0.443222	40.615	-73.9008	New York City	339	3	/images/id_106_400_300.jpg
107	4.59949	0.475048	4.20336	0.558508	3.44574	0.308636	40.6883	-73.8384	New York City	96	1	/images/id_107_400_300.jpg
104	4.58018	0.414035	4.79561	0.751124	4.50596	0.592209	40.6514	-73.9197	New York City	173	1	/images/id_104_400_300.jpg
105	5.5763	0.545803	4.8733	0.659819	5.76159	0.583775	40.737	-74	New York City	155	3	/images/id_105_400_300.jpg
4813	5.84497	0.534558	5.02137	0.721711	6.466	0.663513	42.3316	-71.0426	Boston	317	4	/images/id_4813_400_300.jpg
2047	4.77755	0.442949	5.69536	0.827986	4.54532	0.706211	48.3112	14.2835	Linz	NULL	NULL	/images/id_2047_400_300.jpg
2044	3.37097	0.378556	5.26893	0.69081	3.88578	0.474492	48.3112	14.2833	Linz	NULL	NULL	/images/id_2044_400_300.jpg
4810	6.33744	0.491573	6.05764	0.689077	6.2939	0.618537	42.3505	-71.1226	Boston	54	0	/images/id_4810_400_300.jpg
4817	6.91112	0.517367	7.28484	0.604295	7.29397	0.67344	42.3344	-71.04	Boston	315	8	/images/id_4817_400_300.jpg
4816	5.30696	0.558588	5.97537	0.787741	6.2498	0.625712	42.2947	-71.0537	Boston	23	8	/images/id_4816_400_300.jpg
2040	4.82949	0.422779	3.95164	0.792787	4.95341	0.478839	48.3085	14.2912	Linz	NULL	NULL	/images/id_2040_400_300.jpg
4814	7.00062	0.574533	6.37764	0.814359	8.55163	0.634662	42.3499	-71.0703	Boston	6	20	/images/id_4814_400_300.jpg
4819	4.74247	0.620685	4.29402	0.781695	1.50559	0.45256	42.2905	-71.0716	Boston	311	7	/images/id_4819_400_300.jpg
4818	4.40207	0.558546	4.12463	0.72279	3.83369	0.568384	42.3782	-71.1501	Boston	32	8	/images/id_4818_400_300.jpg
2048	3.78317	0.369206	4.04047	0.691982	4.41455	0.563437	48.3112	14.2835	Linz	NULL	NULL	/images/id_2048_400_300.jpg
2049	4.32689	0.449556	3.41898	0.499229	5.1412	0.429364	48.3158	14.2898	Linz	NULL	NULL	/images/id_2049_400_300.jpg
820	5.80982	0.474923	4.97551	0.764003	5.55123	0.617599	40.6477	-74.0101	New York City	160	4	/images/id_820_400_300.jpg
2038	6.31024	0.418686	6.75995	0.515296	6.08054	0.540923	48.3082	14.2903	Linz	NULL	NULL	/images/id_2038_400_300.jpg
4456	5.04941	0.511819	4.52212	0.71934	3.43331	0.602073	42.3345	-71.1147	Boston	72	5	/images/id_4456_400_300.jpg
3519	2.91837	0.443822	3.98681	0.700192	2.51178	0.591765	40.8166	-73.8141	New York City	21	1	/images/id_3519_400_300.jpg
3518	6.87782	0.567965	5.03315	0.756145	5.87931	0.585566	40.7833	-73.9507	New York City	8	8	/images/id_3518_400_300.jpg
3513	3.36971	0.436707	3.08636	0.453228	3.81138	0.543975	40.7177	-73.965	New York City	96	4	/images/id_3513_400_300.jpg
3512	4.70871	0.487162	3.75641	0.621497	4.75711	0.748789	40.6511	-73.8389	New York City	317	0	/images/id_3512_400_300.jpg
3511	1.54698	0.525892	3.5923	0.579099	2.53477	0.444392	40.6648	-73.8911	New York City	312	-3	/images/id_3511_400_300.jpg
3510	4.67499	0.597548	2.13693	0.745101	3.39725	0.590377	40.6452	-73.9968	New York City	276	4	/images/id_3510_400_300.jpg
3517	2.14312	0.545832	2.79419	0.65924	1.64088	0.556355	40.6409	-73.9437	New York City	26	2	/images/id_3517_400_300.jpg
3516	4.18433	0.551113	4.76208	0.960697	3.08536	0.648483	40.6858	-73.8571	New York City	274	3	/images/id_3516_400_300.jpg
3515	6.93221	0.577184	7.3023	0.987039	6.59777	0.608312	40.8098	-73.9582	New York City	326	10	/images/id_3515_400_300.jpg
3514	3.0784	0.533122	4.79053	0.688219	2.03384	0.479876	40.8267	-73.921	New York City	357	0	/images/id_3514_400_300.jpg
342	3.90072	0.488644	4.84323	0.759255	4.45789	0.528488	40.6563	-73.9215	New York City	57	2	/images/id_342_400_300.jpg
1613	3.30113	0.352455	4.1145	0.513177	4.25451	0.476087	48.302	14.264	Linz	NULL	NULL	/images/id_1613_400_300.jpg
3694	3.73361	0.634232	3.75312	0.808308	5.49043	0.62186	40.6257	-74.0102	New York City	337	2	/images/id_3694_400_300.jpg
3998	2.25401	0.466479	4.75987	0.836804	2.53112	0.505589	40.584	-73.96	New York City	32	4	/images/id_3998_400_300.jpg
1434	5.02679	0.540539	4.28819	0.660631	4.99546	0.56152	42.3592	-71.1305	Boston	196	11	/images/id_1434_400_300.jpg
99	5.64697	0.491911	4.61794	0.707063	5.22198	0.564168	40.6786	-73.9061	New York City	120	3	/images/id_99_400_300.jpg
98	3.97131	0.301163	3.87557	0.641056	4.0522	0.514502	40.6924	-73.9071	New York City	290	3	/images/id_98_400_300.jpg
1435	5.48694	0.475468	4.78642	0.593454	3.94878	0.625023	42.2901	-71.0552	Boston	204	8	/images/id_1435_400_300.jpg
91	4.64706	0.572724	2.93656	0.370828	4.90798	0.534028	40.6576	-73.8453	New York City	179	0	/images/id_91_400_300.jpg
90	5.65944	0.495156	3.57706	0.620652	5.38385	0.552264	40.7094	-73.963	New York City	133	7	/images/id_90_400_300.jpg
93	3.75518	0.34269	3.25074	0.376773	4.07504	0.530386	40.7403	-73.895	New York City	140	3	/images/id_93_400_300.jpg
92	3.22958	0.341119	3.7149	0.560365	4.46508	0.558321	40.6822	-73.9608	New York City	136	2	/images/id_92_400_300.jpg
95	5.92857	0.44248	3.69139	0.592633	5.22451	0.54904	40.5956	-73.9437	New York City	56	9	/images/id_95_400_300.jpg
94	3.02157	0.335173	4.3983	0.647509	3.24152	0.467293	40.6786	-73.986	New York City	149	-1	/images/id_94_400_300.jpg
97	7.05833	0.301942	5.41225	0.683096	6.38003	0.460416	40.7396	-73.9847	New York City	173	5	/images/id_97_400_300.jpg
96	5.81021	0.632259	5.22856	0.697698	4.81112	0.595234	40.789	-73.976	New York City	172	8	/images/id_96_400_300.jpg
1623	4.79331	0.511428	4.99731	0.762079	5.10697	0.463919	48.3023	14.283	Linz	NULL	NULL	/images/id_1623_400_300.jpg
3206	2.75281	0.350506	4.1052	0.841566	3.12267	0.317459	47.812	13.0647	Salzburg	NULL	NULL	/images/id_3206_400_300.jpg
1993	5.44522	0.489088	4.32302	0.561182	5.72267	0.547475	48.302	14.3102	Linz	NULL	NULL	/images/id_1993_400_300.jpg
1620	4.93607	0.483027	6.12743	0.526883	4.15887	0.551039	48.308	14.2475	Linz	NULL	NULL	/images/id_1620_400_300.jpg
1627	5.09822	0.378491	5.66421	0.546948	6.73839	0.459714	48.3025	14.2827	Linz	NULL	NULL	/images/id_1627_400_300.jpg
1626	4.04384	0.442775	4.23987	0.615227	4.17454	0.468316	48.3025	14.2827	Linz	NULL	NULL	/images/id_1626_400_300.jpg
1997	6.62718	0.371426	5.65357	0.72048	5.54181	0.620852	48.3025	14.309	Linz	NULL	NULL	/images/id_1997_400_300.jpg
1624	4.56179	0.482672	6.39445	0.54953	5.61521	0.546542	48.3007	14.2823	Linz	NULL	NULL	/images/id_1624_400_300.jpg
1999	4.68078	0.493474	6.61266	0.652341	6.28573	0.581575	48.3063	14.3078	Linz	NULL	NULL	/images/id_1999_400_300.jpg
1998	5.984	0.461572	4.68354	0.624603	5.0846	0.566574	48.3045	14.3068	Linz	NULL	NULL	/images/id_1998_400_300.jpg
1629	4.03717	0.426491	4.62943	0.656727	4.10057	0.549146	48.3025	14.2827	Linz	NULL	NULL	/images/id_1629_400_300.jpg
1628	6.05818	0.455498	6.62677	0.637675	6.59636	0.487775	48.3025	14.2827	Linz	NULL	NULL	/images/id_1628_400_300.jpg
3209	4.54204	0.487823	4.36607	0.629953	3.73781	0.470987	47.8117	13.0618	Salzburg	NULL	NULL	/images/id_3209_400_300.jpg
3208	4.34636	0.435669	4.68175	0.765146	4.50291	0.564049	47.812	13.063	Salzburg	NULL	NULL	/images/id_3208_400_300.jpg
559	4.30754	0.488406	4.35922	0.601361	4.29202	0.489005	40.7665	-73.8672	New York City	161	4	/images/id_559_400_300.jpg
558	4.8452	0.522098	3.93003	0.522971	5.12553	0.52493	40.6132	-73.9566	New York City	253	2	/images/id_558_400_300.jpg
555	3.98296	0.406623	3.68782	0.629475	3.82998	0.459745	40.6628	-73.9326	New York City	221	5	/images/id_555_400_300.jpg
554	6.24542	0.428464	4.84501	0.610464	5.79339	0.553231	40.723	-73.8526	New York City	183	2	/images/id_554_400_300.jpg
557	4.43912	0.451102	4.16656	0.662007	4.19743	0.572041	40.6732	-73.8501	New York City	190	4	/images/id_557_400_300.jpg
556	4.63831	0.529885	4.34121	0.625762	3.66306	0.424805	40.7006	-73.8888	New York City	188	4	/images/id_556_400_300.jpg
551	4.9212	0.533354	5.15979	0.627426	5.80085	0.617087	40.6536	-74.0032	New York City	154	4	/images/id_551_400_300.jpg
550	5.96809	0.467801	6.59809	0.617967	6.46027	0.462311	40.7145	-73.846	New York City	259	3	/images/id_550_400_300.jpg
553	4.16232	0.380781	4.35553	0.723732	3.09427	0.405768	40.7454	-73.9557	New York City	184	4	/images/id_553_400_300.jpg
552	5.0859	0.473109	4.44857	0.631708	5.21296	0.551889	40.7956	-73.9741	New York City	151	16	/images/id_552_400_300.jpg
1199	5.34784	0.46736	4.98544	0.671901	5.72548	0.48882	42.3537	-71.1466	Boston	142	5	/images/id_1199_400_300.jpg
1198	6.7056	0.314781	6.85569	0.405974	6.33767	0.548865	42.3521	-71.1303	Boston	147	1	/images/id_1198_400_300.jpg
3348	4.04589	0.467323	4.31553	0.557606	5.47774	0.515768	47.8157	13.0202	Salzburg	NULL	NULL	/images/id_3348_400_300.jpg
3349	4.21815	0.427113	4.17082	0.512595	4.45716	0.500978	47.8158	13.0193	Salzburg	NULL	NULL	/images/id_3349_400_300.jpg
1191	5.22368	0.508095	5.43511	0.608654	5.12117	0.445886	42.3106	-71.0836	Boston	251	-3	/images/id_1191_400_300.jpg
3343	5.24832	0.500047	4.6988	0.66992	5.69947	0.53064	47.8065	13.0348	Salzburg	NULL	NULL	/images/id_3343_400_300.jpg
3340	5.04123	0.452982	5.90194	0.875924	5.23475	0.499901	47.7952	13.03	Salzburg	NULL	NULL	/images/id_3340_400_300.jpg
1192	5.80631	0.552833	5.71511	0.562939	6.30441	0.653831	42.36	-71.0664	Boston	154	0	/images/id_1192_400_300.jpg
1195	5.09487	0.493651	5.24433	0.735646	6.14918	0.516105	42.2984	-71.0848	Boston	348	3	/images/id_1195_400_300.jpg
3347	4.70066	0.457283	3.50139	0.646143	4.21434	0.527804	47.8137	13.0217	Salzburg	NULL	NULL	/images/id_3347_400_300.jpg
3344	4.3572	0.479852	3.72413	0.534991	3.67972	0.394904	47.8103	13.0265	Salzburg	NULL	NULL	/images/id_3344_400_300.jpg
1196	6.09028	0.484223	4.91004	0.616471	6.06893	0.432675	42.3453	-71.12	Boston	141	-3	/images/id_1196_400_300.jpg
1759	4.7869	0.425762	4.24651	0.59165	5.42565	0.542409	48.2697	14.28	Linz	NULL	NULL	/images/id_1759_400_300.jpg
1758	5.12591	0.484279	3.95804	0.63332	5.14156	0.548705	48.2707	14.282	Linz	NULL	NULL	/images/id_1758_400_300.jpg
1757	5.73352	0.418016	4.54613	0.63568	5.24383	0.528218	48.2723	14.2808	Linz	NULL	NULL	/images/id_1757_400_300.jpg
1756	4.64935	0.521361	3.5922	0.398289	5.52496	0.545628	48.272	14.2825	Linz	NULL	NULL	/images/id_1756_400_300.jpg
1755	3.66512	0.317495	3.74675	0.538263	3.87893	0.439572	48.272	14.2825	Linz	NULL	NULL	/images/id_1755_400_300.jpg
1754	5.33004	0.457469	4.6457	0.645585	5.94804	0.544624	48.2713	14.2853	Linz	NULL	NULL	/images/id_1754_400_300.jpg
1753	5.56811	0.513121	6.60991	0.621485	6.59807	0.540264	48.2728	14.2868	Linz	NULL	NULL	/images/id_1753_400_300.jpg
1752	3.51715	0.37109	4.91164	0.761404	4.18906	0.457509	48.2728	14.2868	Linz	NULL	NULL	/images/id_1752_400_300.jpg
1751	4.72226	0.475714	5.38132	0.620169	4.75415	0.521518	48.2728	14.2868	Linz	NULL	NULL	/images/id_1751_400_300.jpg
1750	2.72276	0.293614	4.15958	0.71137	3.7284	0.454621	48.2728	14.2868	Linz	NULL	NULL	/images/id_1750_400_300.jpg
4259	6.8358	0.463261	4.05314	0.60718	4.27018	0.642675	40.7821	-73.9177	New York City	355	13	/images/id_4259_400_300.jpg
1176	4.4669	0.478632	3.20423	0.0904867	5.24312	0.614314	42.3914	-71.0937	Boston	177	1	/images/id_1176_400_300.jpg
1175	5.02476	0.49624	5.618	0.580047	4.3835	0.598851	42.3799	-71.117	Boston	234	1	/images/id_1175_400_300.jpg
1174	4.0861	0.466635	3.89151	0.628898	3.13624	0.0929527	42.3738	-71.0886	Boston	167	-1	/images/id_1174_400_300.jpg
1173	3.38218	0.324745	3.27114	0.414832	3.71077	0.453954	42.3304	-71.1243	Boston	216	-1	/images/id_1173_400_300.jpg
1172	3.66246	0.397204	3.81686	0.611525	3.79271	0.559595	42.2944	-71.0526	Boston	113	2	/images/id_1172_400_300.jpg
1171	4.63026	0.449452	5.0889	0.793957	5.04214	0.58081	42.3519	-71.0756	Boston	51	2	/images/id_1171_400_300.jpg
1170	4.33498	0.507311	4.15185	0.650909	4.15609	0.548693	42.342	-71.1189	Boston	131	2	/images/id_1170_400_300.jpg
4251	1.50277	0.466694	3.42342	0.642408	0.994833	0.620841	40.7457	-73.9134	New York City	326	11	/images/id_4251_400_300.jpg
4250	6.36898	0.511082	7.20897	0.774268	6.2997	0.608875	40.7587	-73.9874	New York City	330	-1	/images/id_4250_400_300.jpg
4253	5.90407	0.599817	6.69467	0.699842	7.16472	0.707247	40.7306	-73.9571	New York City	40	11	/images/id_4253_400_300.jpg
4252	2.9744	0.540568	6.46951	0.604526	2.42852	0.658677	40.7146	-74.0072	New York City	345	5	/images/id_4252_400_300.jpg
4255	2.70231	0.479815	4.09721	0.658829	1.89141	0.428205	40.6747	-73.9096	New York City	48	14	/images/id_4255_400_300.jpg
4254	7.99155	0.561735	7.04533	0.710612	8.44993	0.548393	40.7157	-73.8386	New York City	354	7	/images/id_4254_400_300.jpg
1179	4.9736	0.505587	4.86111	0.629665	3.71097	0.369531	42.3045	-71.0718	Boston	192	1	/images/id_1179_400_300.jpg
1178	4.89446	0.428177	5.00194	0.741465	4.5161	0.533974	42.3369	-71.0468	Boston	139	3	/images/id_1178_400_300.jpg
511	4.11075	0.424876	4.31441	0.621402	3.6451	0.403568	40.7544	-73.9349	New York City	191	2	/images/id_511_400_300.jpg
1006	4.60817	0.484516	4.51409	0.591053	5.30976	0.599113	42.3668	-71.1076	Boston	157	7	/images/id_1006_400_300.jpg
3440	5.37459	0.410699	5.83286	0.637971	5.92885	0.674112	47.8228	13.0492	Salzburg	NULL	NULL	/images/id_3440_400_300.jpg
513	3.01444	0.171418	4.0854	0.675149	3.67782	0.404404	40.7832	-73.8448	New York City	177	3	/images/id_513_400_300.jpg
1285	4.22204	0.465935	4.66083	0.623896	4.13076	0.523111	42.4045	-71.1054	Boston	212	1	/images/id_1285_400_300.jpg
1284	3.77519	0.44299	4.49075	0.636574	3.67322	0.376218	42.3933	-71.0868	Boston	187	2	/images/id_1284_400_300.jpg
1287	6.21205	0.490578	5.76401	0.7515	7.15832	0.421678	42.3468	-71.1298	Boston	187	1	/images/id_1287_400_300.jpg
1004	5.17242	0.516778	5.60101	0.63335	4.54697	0.529464	42.3784	-71.0608	Boston	149	10	/images/id_1004_400_300.jpg
1281	4.24498	0.45203	5.23122	0.657618	4.11753	0.496631	42.3459	-71.0739	Boston	231	-2	/images/id_1281_400_300.jpg
1280	6.76522	0.320906	5.32418	0.58387	6.28681	0.5375	42.318	-71.059	Boston	219	-1	/images/id_1280_400_300.jpg
1283	3.54192	0.318132	4.03986	0.55847	3.36982	0.351828	42.3704	-71.0371	Boston	211	-1	/images/id_1283_400_300.jpg
1282	4.35321	0.395853	4.13352	0.674173	4.63141	0.684337	42.3619	-71.1286	Boston	150	1	/images/id_1282_400_300.jpg
515	4.80622	0.451065	5.46493	0.749461	4.04981	0.520535	40.7928	-73.9459	New York City	185	2	/images/id_515_400_300.jpg
1289	3.39238	0.340176	2.98835	0.206554	3.12365	0.154287	42.3901	-71.0229	Boston	36	-2	/images/id_1289_400_300.jpg
1288	4.35617	0.448842	4.08465	0.58476	5.41427	0.543638	42.391	-71.1132	Boston	253	9	/images/id_1288_400_300.jpg
1002	6.08648	0.436886	5.82211	0.615499	6.405	0.599058	42.3391	-71.0524	Boston	155	7	/images/id_1002_400_300.jpg
3430	5.00201	0.490343	3.97139	0.5788	6.11822	0.484431	47.8258	13.0378	Salzburg	NULL	NULL	/images/id_3430_400_300.jpg
689	3.65488	0.336731	4.35405	0.629529	3.55663	0.406098	40.7487	-73.8978	New York City	185	4	/images/id_689_400_300.jpg
1001	5.60024	0.394951	4.71	0.603733	5.53624	0.471913	42.3656	-71.0365	Boston	155	10	/images/id_1001_400_300.jpg
1872	3.70303	0.363038	3.15151	0.492822	3.56351	0.425578	48.2703	14.3112	Linz	NULL	NULL	/images/id_1872_400_300.jpg
3431	4.39475	0.523246	3.73199	0.539099	4.29117	0.470791	47.827	13.0373	Salzburg	NULL	NULL	/images/id_3431_400_300.jpg
685	5.8713	0.509477	4.71859	0.678649	6.04801	0.450039	40.7236	-73.8747	New York City	181	2	/images/id_685_400_300.jpg
684	4.8832	0.531408	4.57663	0.595296	4.72048	0.653494	40.7459	-73.8913	New York City	201	-3	/images/id_684_400_300.jpg
687	5.37118	0.486782	3.83197	0.595968	5.17838	0.646213	40.7184	-73.9937	New York City	179	0	/images/id_687_400_300.jpg
686	4.47701	0.48802	4.73006	0.760853	3.88064	0.409957	40.7174	-73.8755	New York City	40	4	/images/id_686_400_300.jpg
681	3.77783	0.401708	4.60064	0.600545	3.71858	0.437827	40.6802	-73.8809	New York City	18	2	/images/id_681_400_300.jpg
680	2.68403	0.18175	4.497	0.729748	3.00688	0.130936	40.7249	-73.9555	New York City	191	1	/images/id_680_400_300.jpg
683	5.68166	0.431258	4.64573	0.680018	5.7857	0.553269	40.8315	-73.8226	New York City	179	3	/images/id_683_400_300.jpg
682	4.3858	0.40485	5.06854	0.753582	4.28245	0.531824	40.661	-73.9607	New York City	222	-2	/images/id_682_400_300.jpg
1227	5.95036	0.495895	6.32513	0.702887	6.22348	0.518602	42.283	-71.0656	Boston	206	2	/images/id_1227_400_300.jpg
3433	5.00456	0.375869	4.9084	0.640932	5.70858	0.447235	47.824	13.0417	Salzburg	NULL	NULL	/images/id_3433_400_300.jpg
4188	5.84191	0.587004	3.95434	0.780304	7.29521	0.634058	40.7962	-73.9725	New York City	347	8	/images/id_4188_400_300.jpg
1225	5.1289	0.543741	6.49784	0.631954	5.60326	0.473806	42.368	-71.055	Boston	146	1	/images/id_1225_400_300.jpg
873	4.50025	0.476631	4.86539	0.547201	4.65929	0.616765	40.6581	-73.9064	New York City	213	9	/images/id_873_400_300.jpg
620	5.64427	0.550579	3.98898	0.61276	5.18716	0.554817	40.7105	-73.8714	New York City	243	0	/images/id_620_400_300.jpg
3436	4.60393	0.468375	4.3541	0.520485	4.25362	0.600163	47.8235	13.0462	Salzburg	NULL	NULL	/images/id_3436_400_300.jpg
1223	5.95079	0.491115	6.26866	0.480025	6.22559	0.568993	42.3347	-71.0922	Boston	201	0	/images/id_1223_400_300.jpg
1222	4.20165	0.387698	3.65809	0.320856	4.96525	0.57971	42.3879	-71.0357	Boston	170	-2	/images/id_1222_400_300.jpg
2037	5.82206	0.431247	5.93991	0.786156	5.95566	0.629683	48.3088	14.2915	Linz	NULL	NULL	/images/id_2037_400_300.jpg
4389	2.21428	0.43442	3.28935	0.562016	1.32853	0.649306	42.2996	-71.0453	Boston	214	-2	/images/id_4389_400_300.jpg
4388	6.83784	0.586661	5.42487	0.807492	7.23294	0.619692	42.3187	-71.0908	Boston	355	5	/images/id_4388_400_300.jpg
625	5.01025	0.428876	5.3661	0.753157	6.13985	0.59203	40.6684	-73.9416	New York City	245	2	/images/id_625_400_300.jpg
4593	6.76166	0.582248	5.67336	0.81667	5.6058	0.614203	42.3045	-71.0718	Boston	12	1	/images/id_4593_400_300.jpg
4383	3.8714	0.559151	6.43827	0.875086	3.7697	0.625801	42.3935	-71.1335	Boston	324	3	/images/id_4383_400_300.jpg
4382	7.57919	0.521636	7.27781	0.729466	5.74666	0.706083	42.3597	-71.0511	Boston	36	0	/images/id_4382_400_300.jpg
4381	7.51771	0.547414	6.70985	0.760652	8.47672	0.580873	42.3844	-71.1242	Boston	28	13	/images/id_4381_400_300.jpg
4380	6.49769	0.502635	4.74806	0.767455	7.80132	0.698044	42.3762	-71.1036	Boston	9	4	/images/id_4380_400_300.jpg
4387	4.50835	0.588465	4.72318	0.737087	4.45518	0.617327	42.3825	-71.1406	Boston	139	0	/images/id_4387_400_300.jpg
4386	6.71344	0.543009	7.00104	0.649723	7.39212	0.62575	42.3513	-71.155	Boston	331	4	/images/id_4386_400_300.jpg
4385	6.46703	0.512821	5.82945	0.795399	5.37028	0.620438	42.286	-71.054	Boston	35	0	/images/id_4385_400_300.jpg
4384	6.50934	0.47573	7.49288	0.785316	6.67986	0.595859	42.3168	-71.0598	Boston	330	6	/images/id_4384_400_300.jpg
1371	6.22759	0.419261	5.46142	0.719831	6.56848	0.546666	42.3774	-71.1302	Boston	212	2	/images/id_1371_400_300.jpg
1370	3.32858	0.362644	4.07614	0.534084	4.33077	0.64368	42.3571	-71.1462	Boston	137	2	/images/id_1370_400_300.jpg
1373	5.84511	0.484208	4.49612	0.610532	6.01225	0.517307	42.3544	-71.1456	Boston	181	2	/images/id_1373_400_300.jpg
1372	5.05954	0.486698	5.88595	0.692316	4.78311	0.52554	42.3792	-71.0571	Boston	178	0	/images/id_1372_400_300.jpg
1375	5.64587	0.543823	5.24274	0.811473	5.0895	0.573718	42.4027	-71.0401	Boston	221	10	/images/id_1375_400_300.jpg
1374	5.85113	0.428979	5.67634	0.729122	6.75404	0.405133	42.3421	-71.0916	Boston	234	7	/images/id_1374_400_300.jpg
401	6.56	0.421234	6.58275	0.563286	6.9393	0.325624	40.7582	-73.9921	New York City	149	9	/images/id_401_400_300.jpg
1376	5.48256	0.429923	5.36009	0.622414	5.35013	0.451858	42.3477	-71.1493	Boston	185	13	/images/id_1376_400_300.jpg
1379	4.86629	0.508957	6.85691	0.119821	4.56932	0.509207	42.3504	-71.0775	Boston	192	13	/images/id_1379_400_300.jpg
1378	3.32485	0.249356	3.97696	0.473212	3.73647	0.400094	42.3566	-71.0729	Boston	221	8	/images/id_1378_400_300.jpg
629	3.56399	0.391021	3.37275	0.545675	3.12432	0.314954	40.593	-73.9923	New York City	202	1	/images/id_629_400_300.jpg
409	3.15217	0.254842	4.11453	0.561341	3.5714	0.37301	40.7129	-73.9065	New York City	122	1	/images/id_409_400_300.jpg
2032	5.11746	0.457889	3.83973	0.537604	4.94046	0.512067	48.3062	14.2943	Linz	NULL	NULL	/images/id_2032_400_300.jpg
3834	1.33259	0.505986	3.81629	0.794009	3.1776	0.657567	40.7751	-73.9889	New York City	254	12	/images/id_3834_400_300.jpg
3835	3.61469	0.529737	4.55497	0.724653	3.20445	0.625314	40.6905	-73.921	New York City	349	10	/images/id_3835_400_300.jpg
3836	5.27037	0.57761	4.02338	0.648985	3.95293	0.6073	40.8202	-73.94	New York City	71	7	/images/id_3836_400_300.jpg
628	5.25892	0.545752	3.96327	0.706096	4.88994	0.560222	40.7169	-73.8841	New York City	155	2	/images/id_628_400_300.jpg
3830	7.09591	0.608233	7.65521	0.736227	6.39643	0.630444	40.7537	-73.9854	New York City	146	2	/images/id_3830_400_300.jpg
3831	3.61298	0.591171	4.21443	0.780804	3.57918	0.599245	40.6816	-73.8244	New York City	12	9	/images/id_3831_400_300.jpg
3832	4.45487	0.565654	4.53948	0.682409	4.32636	0.515215	40.7973	-73.9663	New York City	332	9	/images/id_3832_400_300.jpg
3833	2.02128	0.424246	2.18206	0.623331	2.11911	0.569171	40.7665	-73.8817	New York City	310	3	/images/id_3833_400_300.jpg
454	3.63553	0.299592	4.50223	0.782694	3.68076	0.422898	40.5977	-73.9697	New York City	191	4	/images/id_454_400_300.jpg
2030	5.20544	0.518484	4.63559	0.784031	5.49688	0.490252	48.3052	14.2998	Linz	NULL	NULL	/images/id_2030_400_300.jpg
3838	3.82996	0.514074	4.61636	0.701388	3.95304	0.597469	40.6723	-74.0049	New York City	323	0	/images/id_3838_400_300.jpg
3839	5.88416	0.588504	4.10115	0.587894	6.77798	0.668456	40.6174	-73.9123	New York City	5	4	/images/id_3839_400_300.jpg
3452	7.04977	0.383501	6.63904	0.634202	6.58789	0.404215	47.8022	13.0455	Salzburg	NULL	NULL	/images/id_3452_400_300.jpg
4031	6.61089	0.509387	4.85936	0.817082	7.08985	0.539114	40.6059	-73.9803	New York City	15	7	/images/id_4031_400_300.jpg
4030	3.97862	0.581513	4.85467	0.857105	3.65744	0.571921	40.8277	-73.919	New York City	320	5	/images/id_4030_400_300.jpg
4033	4.60813	0.493223	3.31835	0.53476	3.9547	0.588607	40.7466	-73.9097	New York City	343	-2	/images/id_4033_400_300.jpg
4032	4.33842	0.578574	3.5542	0.723096	2.36006	0.537971	40.7004	-73.9126	New York City	333	0	/images/id_4032_400_300.jpg
4035	4.20914	0.531242	3.00391	0.636394	2.65488	0.581643	40.7105	-73.8714	New York City	63	0	/images/id_4035_400_300.jpg
4187	6.10615	0.54971	5.95668	0.672193	6.50456	0.544405	40.757	-73.9812	New York City	346	9	/images/id_4187_400_300.jpg
4037	4.42197	0.498694	6.40846	0.829412	1.86254	0.661234	40.5983	-73.9614	New York City	26	3	/images/id_4037_400_300.jpg
4036	1.49196	0.445977	4.2542	0.748209	1.4163	0.568223	40.6438	-74.0202	New York City	334	1	/images/id_4036_400_300.jpg
4039	3.26031	0.55613	1.9344	0.728444	2.47345	0.549123	40.7538	-73.8888	New York City	17	10	/images/id_4039_400_300.jpg
4038	5.41415	0.57851	4.44217	0.847433	6.24252	0.649746	40.6092	-73.9474	New York City	147	6	/images/id_4038_400_300.jpg
1228	4.81649	0.479159	3.89996	0.521539	4.26759	0.48959	42.3359	-71.0407	Boston	137	0	/images/id_1228_400_300.jpg
4846	6.10612	0.529116	4.67058	0.816039	4.86358	0.619434	42.3731	-71.0642	Boston	50	8	/images/id_4846_400_300.jpg
4599	6.19012	0.617081	6.65725	0.763364	6.10652	0.653747	42.345	-71.1244	Boston	351	0	/images/id_4599_400_300.jpg
265	5.84712	0.455616	5.95641	0.760142	5.7064	0.537757	40.5799	-73.9411	New York City	196	2	/images/id_265_400_300.jpg
379	6.73179	0.280969	5.74937	0.693346	7.25776	0.185063	40.5791	-73.9466	New York City	317	-1	/images/id_379_400_300.jpg
378	5.11233	0.550729	4.27155	0.638484	3.94343	0.579894	40.6756	-73.8977	New York City	116	2	/images/id_378_400_300.jpg
1611	4.23437	0.420151	5.91245	0.63054	6.21698	0.391115	48.303	14.271	Linz	NULL	NULL	/images/id_1611_400_300.jpg
2039	6.34589	0.349884	5.32645	0.656897	6.81863	0.436919	48.3085	14.2912	Linz	NULL	NULL	/images/id_2039_400_300.jpg
370	3.90324	0.454011	3.44713	0.572526	4.24501	0.50634	40.6649	-73.9114	New York City	147	1	/images/id_370_400_300.jpg
373	3.63418	0.334633	4.66199	0.775432	4.01232	0.402207	40.8215	-73.9212	New York City	224	2	/images/id_373_400_300.jpg
372	5.32526	0.547972	4.73929	0.698324	5.72756	0.523688	40.6762	-73.9516	New York City	131	5	/images/id_372_400_300.jpg
375	4.71104	0.443463	4.3364	0.632382	5.28316	0.522621	40.6375	-73.9886	New York City	178	-5	/images/id_375_400_300.jpg
374	4.30712	0.459414	3.79517	0.57183	4.66961	0.485602	40.6877	-73.938	New York City	229	4	/images/id_374_400_300.jpg
377	4.74163	0.502908	3.7923	0.511497	4.04729	0.421094	40.8185	-73.819	New York City	187	1	/images/id_377_400_300.jpg
376	4.67688	0.466202	4.44677	0.657396	3.55908	0.376343	40.6883	-73.8704	New York City	324	6	/images/id_376_400_300.jpg
393	3.14962	0.138594	4.30651	0.757383	3.85084	0.427313	40.5804	-73.9625	New York City	142	7	/images/id_393_400_300.jpg
392	4.13064	0.477018	3.55306	0.504816	3.54881	0.393002	40.6343	-73.8961	New York City	102	5	/images/id_392_400_300.jpg
391	6.52528	0.343295	6.72185	0.45	6.89542	0.435696	40.7338	-73.9929	New York City	179	3	/images/id_391_400_300.jpg
390	5.89891	0.506421	3.60248	0.425927	5.04459	0.513776	40.6032	-73.9897	New York City	167	0	/images/id_390_400_300.jpg
397	6.00558	0.525842	5.48254	0.780997	5.51405	0.466068	40.6304	-73.9875	New York City	161	5	/images/id_397_400_300.jpg
396	4.37547	0.524673	4.09334	0.58216	4.76345	0.74024	40.8431	-73.9216	New York City	180	1	/images/id_396_400_300.jpg
395	3.6426	0.403774	3.37336	0.470484	3.71352	0.41145	40.688	-73.9353	New York City	287	12	/images/id_395_400_300.jpg
394	5.29295	0.404121	3.9307	0.484639	5.08073	0.659947	40.6036	-73.956	New York City	100	3	/images/id_394_400_300.jpg
399	5.29334	0.512853	6.7742	0.486293	6.14652	0.475573	40.7483	-73.9764	New York City	140	8	/images/id_399_400_300.jpg
398	2.65785	0.198702	3.95592	0.731066	3.2518	0.35742	40.6913	-73.9156	New York City	193	4	/images/id_398_400_300.jpg
1247	7.10674	0.248149	6.12073	0.617943	6.66493	0.380588	42.3254	-71.0775	Boston	170	0	/images/id_1247_400_300.jpg
4729	5.13087	0.485408	5.0299	0.741142	6.56329	0.636539	42.3439	-71.1228	Boston	355	4	/images/id_4729_400_300.jpg
4728	3.86316	0.533047	4.0388	0.660491	5.04066	0.666552	42.2886	-71.0395	Boston	50	3	/images/id_4728_400_300.jpg
4725	0.560845	0.582538	2.76421	0.757413	0.96639	0.523086	42.3812	-71.089	Boston	15	-3	/images/id_4725_400_300.jpg
4724	6.38306	0.573891	7.26225	0.818225	4.82285	0.626191	42.3805	-71.0327	Boston	46	9	/images/id_4724_400_300.jpg
4727	8.236	0.510115	7.6011	0.631219	9.1643	0.627555	42.3417	-71.0792	Boston	105	6	/images/id_4727_400_300.jpg
4726	3.79315	0.5335	2.27516	0.831279	4.21179	0.514645	42.3304	-71.0456	Boston	45	0	/images/id_4726_400_300.jpg
4721	5.06632	0.533595	4.75407	0.837226	4.6861	0.58424	42.3636	-71.0624	Boston	155	10	/images/id_4721_400_300.jpg
4720	4.35464	0.477936	5.67266	0.844669	4.30928	0.556477	42.2927	-71.0661	Boston	305	7	/images/id_4720_400_300.jpg
4723	7.28383	0.522424	6.22055	0.84572	7.33019	0.57335	42.288	-71.0655	Boston	108	2	/images/id_4723_400_300.jpg
4722	7.13519	0.600659	3.7425	0.789959	7.14372	0.683066	42.384	-71.1016	Boston	344	2	/images/id_4722_400_300.jpg
453	5.74389	0.478041	4.82056	0.744705	5.03752	0.601892	40.6317	-73.9243	New York City	151	1	/images/id_453_400_300.jpg
1246	3.08432	0.2749	4.40551	0.647634	3.49987	0.429581	42.3918	-71.0479	Boston	42	0	/images/id_1246_400_300.jpg
3748	3.99441	0.596479	3.86268	0.69312	3.90335	0.553625	40.6632	-73.8359	New York City	302	1	/images/id_3748_400_300.jpg
3749	4.17557	0.554193	4.76135	0.85429	3.7573	0.512637	40.7758	-73.93	New York City	230	-1	/images/id_3749_400_300.jpg
3746	6.05527	0.54459	3.92741	0.711325	6.19165	0.575613	40.6984	-73.8419	New York City	10	0	/images/id_3746_400_300.jpg
3747	3.70036	0.530849	2.86593	0.789785	1.93371	0.549381	40.7344	-73.8932	New York City	18	0	/images/id_3747_400_300.jpg
3744	4.85093	0.559945	4.02309	0.785029	5.67912	0.615212	40.7408	-73.9757	New York City	1	7	/images/id_3744_400_300.jpg
3745	3.34083	0.542343	3.8527	0.646292	3.1063	0.543195	40.7406	-73.9737	New York City	334	11	/images/id_3745_400_300.jpg
3742	2.84487	0.540646	4.95374	0.8291	5.52338	0.596304	40.7401	-73.973	New York City	231	-4	/images/id_3742_400_300.jpg
3743	3.02907	0.508645	2.85768	0.744783	3.02902	0.53805	40.7191	-73.8866	New York City	351	0	/images/id_3743_400_300.jpg
3740	3.87846	0.534653	4.81271	0.701264	3.55404	0.628566	40.6915	-73.8277	New York City	8	6	/images/id_3740_400_300.jpg
3741	6.71221	0.56562	4.68782	0.6338	5.25728	0.639146	40.6201	-74.0087	New York City	345	2	/images/id_3741_400_300.jpg
245	3.6623	0.371951	4.56954	0.635155	4.02985	0.579365	40.8215	-73.911	New York City	238	3	/images/id_245_400_300.jpg
4621	5.99485	0.590029	5.24083	0.766268	5.81024	0.613613	42.4047	-71.1259	Boston	88	8	/images/id_4621_400_300.jpg
4622	7.70585	0.469551	6.43038	0.729126	7.25476	0.624896	42.3511	-71.1338	Boston	31	2	/images/id_4622_400_300.jpg
4623	4.71119	0.572427	4.71874	0.61379	5.76405	0.569467	42.3153	-71.0905	Boston	322	1	/images/id_4623_400_300.jpg
4624	6.37019	0.533815	3.33171	0.724229	6.82253	0.62128	42.3426	-71.146	Boston	83	8	/images/id_4624_400_300.jpg
4625	5.1836	0.470299	3.65073	0.727083	5.08743	0.675224	42.3684	-71.0987	Boston	343	-1	/images/id_4625_400_300.jpg
4626	7.10505	0.554633	6.73439	0.756842	8.51413	0.497637	42.378	-71.1118	Boston	38	1	/images/id_4626_400_300.jpg
242	4.99078	0.504132	4.09434	0.600439	5.68445	0.495089	40.6964	-73.9181	New York City	281	8	/images/id_242_400_300.jpg
4628	1.70099	0.545909	3.92404	0.712599	2.65566	0.518727	42.3349	-71.0933	Boston	352	4	/images/id_4628_400_300.jpg
4629	6.44817	0.483072	7.55516	0.580624	7.46745	0.570803	42.3882	-71.1017	Boston	349	2	/images/id_4629_400_300.jpg
249	2.86129	0.247704	3.12146	0.368179	3.05981	0.341236	40.6645	-73.8714	New York City	-58	-2	/images/id_249_400_300.jpg
248	4.77055	0.41731	3.53806	0.577883	5.27765	0.486202	40.5957	-73.9507	New York City	196	1	/images/id_248_400_300.jpg
1248	6.66795	0.391621	5.70754	0.627942	6.03322	0.474052	42.2799	-71.0596	Boston	244	-2	/images/id_1248_400_300.jpg
3201	3.71515	0.428272	5.28827	0.803383	3.93252	0.54445	47.8125	13.0622	Salzburg	NULL	NULL	/images/id_3201_400_300.jpg
2156	5.26823	0.479555	5.44557	0.693315	4.77697	0.521702	48.3112	14.2868	Linz	NULL	NULL	/images/id_2156_400_300.jpg
179	5.12209	0.497952	5.84168	0.668386	5.36151	0.590191	40.6972	-73.9959	New York City	357	1	/images/id_179_400_300.jpg
178	3.95193	0.428376	3.59961	0.574154	3.81115	0.399839	40.6156	-73.9467	New York City	193	-3	/images/id_178_400_300.jpg
177	2.95747	0.27865	3.72098	0.348968	3.75048	0.428409	40.5906	-73.9751	New York City	111	5	/images/id_177_400_300.jpg
176	3.9056	0.442649	3.51131	0.423285	3.37442	0.319054	40.591	-73.9694	New York City	150	8	/images/id_176_400_300.jpg
175	4.02653	0.41089	5.63284	0.849958	3.92194	0.442429	40.6531	-73.9392	New York City	200	-4	/images/id_175_400_300.jpg
174	5.49256	0.448834	5.13093	0.965401	4.87443	0.520364	40.7782	-73.9217	New York City	253	4	/images/id_174_400_300.jpg
173	3.97903	0.495367	5.97156	0.635	4.24898	0.562497	40.7069	-73.9536	New York City	151	9	/images/id_173_400_300.jpg
172	4.01898	0.413371	NULL	NULL	4.27333	0.46148	40.5804	-73.9635	New York City	142	5	/images/id_172_400_300.jpg
171	5.64127	0.364666	5.09501	0.676754	5.44435	0.532422	40.6737	-73.9543	New York City	124	10	/images/id_171_400_300.jpg
170	3.70013	0.41795	4.19895	0.638432	3.35606	0.349518	40.6544	-73.8495	New York City	112	1	/images/id_170_400_300.jpg
3698	2.97101	0.506161	3.6115	0.692024	3.90568	0.564173	40.6934	-73.9129	New York City	337	7	/images/id_3698_400_300.jpg
3699	6.30608	0.492838	5.21084	0.736756	6.06429	0.758333	40.7077	-73.8345	New York City	21	0	/images/id_3699_400_300.jpg
2053	5.40747	0.555045	4.26753	0.540094	4.51364	0.463893	48.3178	14.2927	Linz	NULL	NULL	/images/id_2053_400_300.jpg
2052	5.95461	0.460339	3.84509	0.58419	5.06951	0.612744	48.3168	14.2917	Linz	NULL	NULL	/images/id_2052_400_300.jpg
4538	6.18425	0.533008	2.73459	0.756157	5.26873	0.51817	42.3979	-71.0858	Boston	28	1	/images/id_4538_400_300.jpg
4539	2.1438	0.521127	2.01076	0.74505	2.3999	0.598088	42.3768	-71.093	Boston	336	-2	/images/id_4539_400_300.jpg
2057	5.20438	0.392558	4.62874	0.753025	4.589	0.705066	48.3178	14.2897	Linz	NULL	NULL	/images/id_2057_400_300.jpg
4829	3.39402	0.58949	3.07795	0.794292	4.04722	0.607708	42.3254	-71.0639	Boston	7	9	/images/id_4829_400_300.jpg
2059	4.20455	0.472642	3.45649	0.445755	3.82933	0.367644	48.3218	14.2883	Linz	NULL	NULL	/images/id_2059_400_300.jpg
4535	7.09351	0.436057	5.75224	0.710376	7.11122	0.630214	42.3331	-71.0338	Boston	50	2	/images/id_4535_400_300.jpg
4824	7.42456	0.584929	6.44019	0.734182	7.11658	0.624935	42.3773	-71.1344	Boston	37	7	/images/id_4824_400_300.jpg
4537	2.52143	0.478303	4.12145	0.658388	3.45205	0.545722	42.3803	-71.1035	Boston	124	2	/images/id_4537_400_300.jpg
4530	5.5189	0.569518	3.28049	0.810788	4.09996	0.629616	42.2896	-71.0872	Boston	348	2	/images/id_4530_400_300.jpg
4823	5.39734	0.516794	3.12171	0.776913	5.49982	0.597792	42.28	-71.0496	Boston	10	6	/images/id_4823_400_300.jpg
4532	3.29911	0.558271	4.17942	0.784794	4.86851	0.684	42.304	-71.0546	Boston	337	2	/images/id_4532_400_300.jpg
4821	5.65377	0.512565	3.66211	0.78105	6.17229	0.711356	42.2834	-71.0699	Boston	25	9	/images/id_4821_400_300.jpg
655	4.11986	0.449852	5.49271	0.821586	4.79061	0.486029	40.6871	-73.9295	New York City	215	6	/images/id_655_400_300.jpg
1506	3.95312	0.41409	5.35407	0.874151	3.89209	0.461208	42.3128	-71.0904	Boston	341	3	/images/id_1506_400_300.jpg
2968	5.49689	0.492305	5.06027	0.828941	6.74333	0.411891	47.7983	13.0608	Salzburg	NULL	NULL	/images/id_2968_400_300.jpg
3088	6.15291	0.462854	6.74074	0.650768	6.2569	0.310547	47.7978	13.0545	Salzburg	NULL	NULL	/images/id_3088_400_300.jpg
2969	5.54651	0.432766	5.83249	0.68752	6.51823	0.682082	47.799	13.0498	Salzburg	NULL	NULL	/images/id_2969_400_300.jpg
1110	4.84152	0.516675	5.36884	0.696799	4.47625	0.52689	42.3661	-71.1259	Boston	242	1	/images/id_1110_400_300.jpg
650	4.78652	0.524404	4.44318	0.682086	3.44592	0.374652	40.5914	-73.943	New York City	217	5	/images/id_650_400_300.jpg
651	6.39262	0.395592	5.86014	0.538395	5.77429	0.590843	40.7503	-73.9733	New York City	157	6	/images/id_651_400_300.jpg
3526	2.83217	0.495801	7.40864	0.7465	2.61546	0.59989	40.688	-73.9195	New York City	269	8	/images/id_3526_400_300.jpg
3527	8.24556	0.456143	7.76065	0.836348	8.14206	0.693277	40.6795	-73.9731	New York City	324	3	/images/id_3527_400_300.jpg
3524	3.45215	0.504005	1.48678	0.816851	1.7948	0.589361	40.6135	-74.0073	New York City	1	0	/images/id_3524_400_300.jpg
3525	5.29075	0.488395	5.52845	0.803853	3.52692	0.54466	40.6677	-73.9908	New York City	358	10	/images/id_3525_400_300.jpg
3522	3.74934	0.469917	4.08386	0.648768	2.7698	0.255422	40.6434	-73.8879	New York City	19	2	/images/id_3522_400_300.jpg
3523	6.56298	0.657686	7.09346	0.815063	8.36254	0.549801	40.6748	-73.9643	New York City	74	2	/images/id_3523_400_300.jpg
3520	0.762055	0.460119	2.16767	0.572258	1.76656	0.470312	40.6307	-74.0047	New York City	346	-1	/images/id_3520_400_300.jpg
3521	6.08383	0.53534	3.37649	0.645097	5.90614	0.676273	40.6775	-73.8485	New York City	15	0	/images/id_3521_400_300.jpg
1508	4.98995	0.458271	3.86627	0.555315	5.68355	0.523207	42.3297	-71.1279	Boston	100	-1	/images/id_1508_400_300.jpg
3528	5.33181	0.502755	2.55208	0.628036	5.17454	0.750289	40.6125	-73.9107	New York City	117	6	/images/id_3528_400_300.jpg
3529	4.14403	0.486717	2.26286	0.528492	3.00972	0.575083	40.7088	-73.8958	New York City	28	0	/images/id_3529_400_300.jpg
270	4.09379	0.443666	5.15458	0.930495	5.50199	0.534141	40.7027	-73.905	New York City	111	-1	/images/id_270_400_300.jpg
3086	5.43798	0.516453	5.16529	0.77682	6.70457	0.393668	47.7952	13.059	Salzburg	NULL	NULL	/images/id_3086_400_300.jpg
338	4.38817	0.492505	4.40431	0.760332	3.39086	0.398217	40.6128	-73.9873	New York City	160	1	/images/id_338_400_300.jpg
271	4.44003	0.4622	5.06522	0.673292	5.53264	0.518024	40.8094	-73.9628	New York City	201	5	/images/id_271_400_300.jpg
272	5.89109	0.407244	5.76199	0.59432	6.62598	0.460211	40.7137	-73.8374	New York City	258	1	/images/id_272_400_300.jpg
3080	3.87976	0.460058	4.28496	0.645175	5.77398	0.486317	47.7957	13.0648	Salzburg	NULL	NULL	/images/id_3080_400_300.jpg
1977	5.96567	0.492696	4.20109	0.750411	4.28069	0.381894	48.2972	14.3102	Linz	NULL	NULL	/images/id_1977_400_300.jpg
273	3.8017	0.363179	3.58796	0.380407	3.48396	0.343035	40.7196	-73.8771	New York City	298	-2	/images/id_273_400_300.jpg
3224	3.87525	0.436721	4.70344	0.59052	3.58187	0.450751	47.8098	13.0507	Salzburg	NULL	NULL	/images/id_3224_400_300.jpg
274	5.02955	0.435713	4.28041	0.716239	4.43404	0.586523	40.798	-73.9601	New York City	346	11	/images/id_274_400_300.jpg
3082	5.14051	0.484898	5.77601	0.685732	6.76477	0.468948	47.7957	13.0648	Salzburg	NULL	NULL	/images/id_3082_400_300.jpg
1975	4.75607	0.442301	3.10482	0.454702	3.94572	0.502544	48.2975	14.3097	Linz	NULL	NULL	/images/id_1975_400_300.jpg
275	3.76743	0.372813	4.88218	0.681789	3.45749	0.315383	40.8267	-73.9354	New York City	81	7	/images/id_275_400_300.jpg
3226	4.54477	0.389647	5.27671	0.813952	4.2021	0.51666	47.8097	13.0493	Salzburg	NULL	NULL	/images/id_3226_400_300.jpg
4653	4.3212	0.484703	4.93883	0.768065	5.45508	0.530929	42.3981	-71.1068	Boston	64	-1	/images/id_4653_400_300.jpg
3221	2.93519	0.281479	4.38982	0.856834	3.07126	0.356175	47.815	13.0487	Salzburg	NULL	NULL	/images/id_3221_400_300.jpg
277	3.25454	0.27877	2.85977	0.26593	2.63919	0.19812	40.7262	-73.8779	New York City	123	-5	/images/id_277_400_300.jpg
3220	3.89568	0.41479	5.8586	0.844833	5.7622	0.536553	47.815	13.0487	Salzburg	NULL	NULL	/images/id_3220_400_300.jpg
3672	5.86343	0.575958	4.62259	0.504969	7.58514	0.639956	40.6669	-73.8259	New York City	161	3	/images/id_3672_400_300.jpg
1971	4.68399	0.453613	5.03086	1.0765	5.45072	0.611688	48.2975	14.3122	Linz	NULL	NULL	/images/id_1971_400_300.jpg
4557	6.72378	0.510403	5.08158	0.839331	6.25911	0.693602	42.3296	-71.0368	Boston	329	1	/images/id_4557_400_300.jpg
1970	3.51313	0.335591	4.31889	0.7852	3.65238	0.500414	48.2922	14.3172	Linz	NULL	NULL	/images/id_1970_400_300.jpg
4554	3.12498	0.570366	3.90459	0.83994	0.904657	0.482438	42.3518	-71.1317	Boston	129	1	/images/id_4554_400_300.jpg
3232	5.34274	0.565144	5.12466	0.779177	5.27416	0.645463	47.8092	13.0483	Salzburg	NULL	NULL	/images/id_3232_400_300.jpg
3233	3.82266	0.332545	4.73454	0.721116	3.81323	0.388928	47.8092	13.0483	Salzburg	NULL	NULL	/images/id_3233_400_300.jpg
3230	4.11712	0.456637	3.57599	0.648243	4.10831	0.469141	47.8097	13.05	Salzburg	NULL	NULL	/images/id_3230_400_300.jpg
3671	5.64082	0.580269	5.80296	0.658678	6.56659	0.597281	40.7345	-74.0101	New York City	33	8	/images/id_3671_400_300.jpg
1968	5.58702	0.459112	4.43447	0.646404	4.9721	0.615594	48.2978	14.314	Linz	NULL	NULL	/images/id_1968_400_300.jpg
1969	5.16213	0.517125	4.32098	0.560303	5.30655	0.589315	48.2978	14.314	Linz	NULL	NULL	/images/id_1969_400_300.jpg
1618	5.48669	0.47868	6.10216	0.613291	5.44924	0.557704	48.308	14.2475	Linz	NULL	NULL	/images/id_1618_400_300.jpg
1619	5.55867	0.456271	6.3559	0.673892	6.13504	0.418839	48.308	14.2475	Linz	NULL	NULL	/images/id_1619_400_300.jpg
1964	5.42263	0.447811	4.39676	0.612281	5.61681	0.520055	48.297	14.3127	Linz	NULL	NULL	/images/id_1964_400_300.jpg
1617	5.64867	0.544356	4.97668	0.598483	5.21736	0.681553	48.308	14.2475	Linz	NULL	NULL	/images/id_1617_400_300.jpg
3238	5.59455	0.514912	5.38363	0.665124	4.57402	0.505976	47.8092	13.0422	Salzburg	NULL	NULL	/images/id_3238_400_300.jpg
3239	5.42188	0.389517	6.52478	0.517871	5.84305	0.586415	47.809	13.0413	Salzburg	NULL	NULL	/images/id_3239_400_300.jpg
1960	3.89438	0.443441	3.46199	0.516982	5.58854	0.529689	48.296	14.3152	Linz	NULL	NULL	/images/id_1960_400_300.jpg
1961	4.2096	0.428727	4.07809	0.605983	3.87293	0.632083	48.296	14.3153	Linz	NULL	NULL	/images/id_1961_400_300.jpg
1962	6.11447	0.437512	4.85687	0.718973	4.691	0.574333	48.296	14.3153	Linz	NULL	NULL	/images/id_1962_400_300.jpg
1963	5.90312	0.473273	4.87257	0.671834	5.14242	0.43342	48.296	14.3153	Linz	NULL	NULL	/images/id_1963_400_300.jpg
4550	5.1842	0.527227	5.71592	0.742074	4.82709	0.749606	42.3567	-71.1113	Boston	4	0	/images/id_4550_400_300.jpg
1749	4.61185	0.611405	6.35347	0.541013	4.86983	0.535462	48.2733	14.2868	Linz	NULL	NULL	/images/id_1749_400_300.jpg
3675	5.54318	0.542375	3.55404	0.723797	5.03991	0.676008	40.6402	-73.889	New York City	353	1	/images/id_3675_400_300.jpg
3683	4.89725	0.58085	4.36638	0.766228	3.62967	0.561926	40.8166	-73.8024	New York City	351	0	/images/id_3683_400_300.jpg
4534	2.72793	0.51636	3.32389	0.703207	1.70425	0.410623	42.305	-71.0567	Boston	348	2	/images/id_4534_400_300.jpg
3355	4.92283	0.431589	4.77319	0.553927	5.50415	0.54618	47.8162	13.0155	Salzburg	NULL	NULL	/images/id_3355_400_300.jpg
3354	4.07432	0.457509	6.38372	0.69042	3.9454	0.575016	47.8167	13.0157	Salzburg	NULL	NULL	/images/id_3354_400_300.jpg
3357	3.71753	0.454684	3.76503	0.595842	4.42454	0.549074	47.8168	13.0138	Salzburg	NULL	NULL	/images/id_3357_400_300.jpg
3351	5.53556	0.484293	4.03992	0.574626	5.57637	0.570304	47.817	13.0168	Salzburg	NULL	NULL	/images/id_3351_400_300.jpg
3350	5.25965	0.435511	5.18234	0.708248	6.91019	0.493636	47.8163	13.0187	Salzburg	NULL	NULL	/images/id_3350_400_300.jpg
3353	4.16212	0.444436	4.39191	0.693994	5.56186	0.453111	47.817	13.0162	Salzburg	NULL	NULL	/images/id_3353_400_300.jpg
3352	3.09623	0.358607	4.17073	0.512493	4.75829	0.448443	47.8172	13.0163	Salzburg	NULL	NULL	/images/id_3352_400_300.jpg
1360	4.42708	0.478199	5.96453	0.62543	4.6195	0.440758	42.373	-71.122	Boston	144	-1	/images/id_1360_400_300.jpg
893	4.13516	0.489744	3.46219	0.448037	4.12803	0.47583	40.6093	-74.0029	New York City	188	3	/images/id_893_400_300.jpg
3359	5.08418	0.478972	5.75181	0.696941	5.34708	0.630122	47.8202	13.0145	Salzburg	NULL	NULL	/images/id_3359_400_300.jpg
3358	4.66523	0.507614	NULL	NULL	5.10754	0.507829	47.8193	13.0152	Salzburg	NULL	NULL	/images/id_3358_400_300.jpg
4835	5.94569	0.496529	7.83748	0.522234	7.6396	0.62096	42.3086	-71.0506	Boston	343	11	/images/id_4835_400_300.jpg
1181	6.22589	0.5302	5.08285	0.765243	6.71361	0.420541	42.3604	-71.146	Boston	105	0	/images/id_1181_400_300.jpg
1366	3.41697	0.425229	3.59669	0.570887	3.89043	0.472028	42.3542	-71.107	Boston	203	5	/images/id_1366_400_300.jpg
1768	4.24717	0.378671	2.8447	0.266038	4.54572	0.592888	48.269	14.2783	Linz	NULL	NULL	/images/id_1768_400_300.jpg
1769	5.37254	0.435734	4.91199	0.672858	5.3369	0.484721	48.269	14.2783	Linz	NULL	NULL	/images/id_1769_400_300.jpg
1361	5.73747	0.453119	6.2379	0.533977	5.58527	0.60155	42.3846	-71.1332	Boston	188	8	/images/id_1361_400_300.jpg
1762	4.98109	0.422178	5.57986	0.688585	5.6335	0.535424	48.2703	14.278	Linz	NULL	NULL	/images/id_1762_400_300.jpg
1763	5.05475	0.592355	3.92448	0.54981	4.5087	0.55164	48.2703	14.277	Linz	NULL	NULL	/images/id_1763_400_300.jpg
1760	6.02772	0.472913	5.07176	0.616725	5.45014	0.519413	48.27	14.2797	Linz	NULL	NULL	/images/id_1760_400_300.jpg
1761	5.05386	0.496996	4.52362	0.565896	5.3526	0.550597	48.2703	14.2785	Linz	NULL	NULL	/images/id_1761_400_300.jpg
1766	4.12533	0.440338	3.3369	0.493899	4.12286	0.523663	48.2687	14.2772	Linz	NULL	NULL	/images/id_1766_400_300.jpg
1767	3.38675	0.398947	2.91688	0.55495	4.44854	0.54878	48.2692	14.281	Linz	NULL	NULL	/images/id_1767_400_300.jpg
1765	4.29276	0.412731	4.72092	0.643405	5.04473	0.503458	48.2702	14.2773	Linz	NULL	NULL	/images/id_1765_400_300.jpg
1142	3.1747	0.266066	5.34904	0.619732	3.20841	0.267712	42.3583	-71.1272	Boston	210	1	/images/id_1142_400_300.jpg
1143	5.73666	0.505832	5.40455	0.854011	6.54775	0.472648	42.3296	-71.0368	Boston	94	3	/images/id_1143_400_300.jpg
1140	3.99745	0.425164	5.33282	0.730191	3.42146	0.419856	42.3518	-71.1317	Boston	309	1	/images/id_1140_400_300.jpg
1141	4.02724	0.433714	5.22877	0.69638	5.22275	0.646694	42.3577	-71.1127	Boston	82	-1	/images/id_1141_400_300.jpg
1146	5.06664	0.458034	6.19547	0.704764	4.49121	0.496314	42.347	-71.1263	Boston	144	-2	/images/id_1146_400_300.jpg
1147	5.58194	0.528128	4.26241	0.565232	5.48442	0.637315	42.3512	-71.1444	Boston	85	-1	/images/id_1147_400_300.jpg
1144	5.35109	0.45724	3.15408	0.179843	5.23979	0.519192	42.3058	-71.0829	Boston	166	0	/images/id_1144_400_300.jpg
1145	4.48066	0.50382	5.91876	0.734089	5.45778	0.489858	42.3601	-71.0835	Boston	199	1	/images/id_1145_400_300.jpg
1148	4.72128	0.396866	5.39411	0.627137	6.11623	0.610385	42.3763	-71.0668	Boston	184	0	/images/id_1148_400_300.jpg
1149	5.91423	0.478683	4.22722	0.619946	5.0217	0.641329	42.3354	-71.0709	Boston	193	6	/images/id_1149_400_300.jpg
2967	5.52443	0.510561	6.08877	0.831279	5.16161	0.505759	47.7983	13.0692	Salzburg	NULL	NULL	/images/id_2967_400_300.jpg
769	4.8518	0.477693	4.27615	0.644686	4.43247	0.496797	40.6792	-73.8316	New York City	188	9	/images/id_769_400_300.jpg
2092	5.67131	0.44137	6.07498	0.567037	5.07093	0.549247	48.3167	14.283	Linz	NULL	NULL	/images/id_2092_400_300.jpg
2960	4.65854	0.431171	5.17503	0.906708	3.68718	0.418383	47.7857	13.0805	Salzburg	NULL	NULL	/images/id_2960_400_300.jpg
692	5.04264	0.500769	4.116	0.73448	5.0904	0.60032	40.6243	-73.9397	New York City	182	2	/images/id_692_400_300.jpg
693	6.005	0.441219	4.95352	0.644461	6.13592	0.463124	40.8087	-73.9417	New York City	149	2	/images/id_693_400_300.jpg
690	4.90023	0.498304	4.28481	0.613467	5.02534	0.594287	40.6951	-73.9212	New York City	195	5	/images/id_690_400_300.jpg
691	5.02632	0.469358	4.54499	0.682583	3.0644	0.337011	40.6894	-73.9514	New York City	198	5	/images/id_691_400_300.jpg
696	5.47814	0.488494	5.33283	0.636571	4.90638	0.537423	40.8154	-73.8165	New York City	188	5	/images/id_696_400_300.jpg
697	5.1003	0.482767	5.68554	0.841157	6.10832	0.520762	40.7675	-73.967	New York City	154	9	/images/id_697_400_300.jpg
694	3.94362	0.33185	3.51804	0.513094	3.61777	0.372849	40.8439	-73.9174	New York City	203	4	/images/id_694_400_300.jpg
695	4.35507	0.488493	3.83946	0.552999	3.13417	0.149806	40.6386	-73.9067	New York City	172	3	/images/id_695_400_300.jpg
698	5.55472	0.446194	4.18371	0.612663	5.28827	0.627261	40.7902	-73.8462	New York City	126	3	/images/id_698_400_300.jpg
699	3.35249	0.355801	3.35876	0.433788	3.00727	0.30232	40.824	-73.9229	New York City	173	2	/images/id_699_400_300.jpg
542	6.49055	0.383445	6.76675	0.0608647	6.1465	0.554718	40.7764	-73.9785	New York City	145	3	/images/id_542_400_300.jpg
543	3.9575	0.399663	3.69672	0.609411	4.10356	0.408351	40.8343	-73.8167	New York City	189	4	/images/id_543_400_300.jpg
540	3.41489	0.466702	3.62443	0.486083	3.54542	0.452016	40.7418	-73.9529	New York City	126	-1	/images/id_540_400_300.jpg
541	3.12095	0.374895	4.16084	0.538348	2.79812	0.197195	40.753	-73.8643	New York City	181	7	/images/id_541_400_300.jpg
546	4.1888	0.494272	3.78694	0.445551	3.27608	0.31132	40.5956	-74.0004	New York City	92	7	/images/id_546_400_300.jpg
547	4.88222	0.445096	5.77967	0.686508	4.8285	0.559854	40.7157	-73.9403	New York City	224	6	/images/id_547_400_300.jpg
544	6.04399	0.425952	4.53409	0.647813	4.91509	0.514444	40.779	-73.9545	New York City	149	7	/images/id_544_400_300.jpg
545	5.3742	0.429498	5.23897	0.782161	5.00591	0.511768	40.613	-73.9697	New York City	187	12	/images/id_545_400_300.jpg
548	4.11423	0.358451	4.57214	0.644913	4.47378	0.444336	40.6852	-73.9461	New York City	234	5	/images/id_548_400_300.jpg
549	5.31495	0.563025	4.58865	0.659891	4.29297	0.521903	40.6798	-73.8467	New York City	178	2	/images/id_549_400_300.jpg
1782	5.05349	0.591573	3.66098	0.447919	4.54292	0.551874	48.2655	14.2862	Linz	NULL	NULL	/images/id_1782_400_300.jpg
1783	5.35452	0.438353	3.53625	0.567403	5.86897	0.552479	48.2655	14.2862	Linz	NULL	NULL	/images/id_1783_400_300.jpg
1784	4.08931	0.445831	5.39453	0.65167	4.69007	0.60091	48.2643	14.282	Linz	NULL	NULL	/images/id_1784_400_300.jpg
4533	7.6519	0.503149	6.2132	0.736838	8.4599	0.783455	42.3756	-71.1305	Boston	39	1	/images/id_4533_400_300.jpg
767	3.71668	0.476818	3.87459	0.583094	3.59042	0.532414	40.7425	-73.9368	New York City	216	-1	/images/id_767_400_300.jpg
1786	5.45746	0.636578	5.04724	0.646312	6.03405	0.486155	48.2638	14.282	Linz	NULL	NULL	/images/id_1786_400_300.jpg
1787	4.82298	0.496476	3.898	0.800518	5.84015	0.586482	48.2615	14.2878	Linz	NULL	NULL	/images/id_1787_400_300.jpg
4531	4.62159	0.573364	4.54054	0.756443	4.77708	0.608547	42.3968	-71.0894	Boston	1	3	/images/id_4531_400_300.jpg
414	5.38934	0.5034	4.90555	0.66313	6.02568	0.661931	40.6816	-73.8244	New York City	192	-2	/images/id_414_400_300.jpg
415	4.14748	0.431801	5.02693	0.697236	4.42752	0.501019	40.7973	-73.9663	New York City	181	11	/images/id_415_400_300.jpg
416	3.50834	0.373261	3.76596	0.737433	3.24245	0.360318	40.7665	-73.8817	New York City	150	-2	/images/id_416_400_300.jpg
417	4.47892	0.453334	4.76117	0.814832	5.29161	0.59111	40.7751	-73.9889	New York City	100	3	/images/id_417_400_300.jpg
1388	4.48865	0.456364	4.64599	0.644419	4.5815	0.505404	42.2821	-71.0626	Boston	143	-1	/images/id_1388_400_300.jpg
1389	6.04255	0.468607	6.12965	0.704505	6.49244	0.463545	42.3804	-71.0323	Boston	199	15	/images/id_1389_400_300.jpg
412	5.61931	0.58027	3.76771	0.649837	4.54668	0.467843	40.5937	-73.9483	New York City	329	2	/images/id_412_400_300.jpg
413	4.91753	0.436383	4.7336	0.778242	4.5978	0.593777	40.7537	-73.9854	New York City	292	0	/images/id_413_400_300.jpg
1384	5.43233	0.533206	4.89804	0.768832	4.33821	0.576417	42.2891	-71.0766	Boston	213	10	/images/id_1384_400_300.jpg
1385	4.48176	0.643187	4.99331	0.648811	4.09111	0.480673	42.3973	-71.1061	Boston	164	5	/images/id_1385_400_300.jpg
1386	3.11331	0.181048	4.01038	0.583229	3.1141	0.263759	42.3925	-71.0266	Boston	130	3	/images/id_1386_400_300.jpg
1387	3.71231	0.314484	4.28466	0.568164	4.25158	0.452499	42.3198	-71.0702	Boston	225	-2	/images/id_1387_400_300.jpg
418	5.14579	0.492247	6.21496	0.965025	5.18274	0.628043	40.6905	-73.921	New York City	179	10	/images/id_418_400_300.jpg
419	4.73199	0.525814	4.67135	0.679666	4.84467	0.563013	40.8202	-73.94	New York City	251	7	/images/id_419_400_300.jpg
1382	5.77015	0.422786	4.91025	0.730202	5.52898	0.56826	42.297	-71.0816	Boston	189	4	/images/id_1382_400_300.jpg
1383	3.41462	0.418415	3.17623	0.369389	3.29153	0.459142	42.3359	-71.0552	Boston	163	8	/images/id_1383_400_300.jpg
3827	4.15274	0.546102	6.92694	0.701545	3.72475	0.58182	40.7129	-73.9065	New York City	323	13	/images/id_3827_400_300.jpg
3826	1.63364	0.500527	3.85498	0.788429	1.70836	0.395394	40.8178	-73.9301	New York City	339	7	/images/id_3826_400_300.jpg
3825	2.14229	0.469912	3.30663	0.7926	1.86257	0.560241	40.7686	-73.9288	New York City	59	4	/images/id_3825_400_300.jpg
3824	5.01615	0.577648	6.18493	0.605863	5.27458	0.663037	40.7474	-73.982	New York City	331	9	/images/id_3824_400_300.jpg
3823	3.15474	0.561698	4.17863	0.793504	3.11957	0.621881	40.685	-73.8394	New York City	21	9	/images/id_3823_400_300.jpg
3822	4.23963	0.554678	4.38788	0.667621	4.07017	0.539386	40.7502	-73.8939	New York City	34	8	/images/id_3822_400_300.jpg
3821	4.41038	0.538785	3.91399	0.712402	4.01452	0.647442	40.822	-73.9387	New York City	9	5	/images/id_3821_400_300.jpg
3820	6.11085	0.575338	6.7825	0.855635	7.45419	0.716545	40.7582	-73.9921	New York City	343	9	/images/id_3820_400_300.jpg
3829	3.05011	0.540877	2.91011	0.576294	2.73441	0.56685	40.5937	-73.9483	New York City	149	2	/images/id_3829_400_300.jpg
3828	4.04961	0.529846	3.48261	0.738541	2.61814	0.517522	40.7643	-73.8746	New York City	314	11	/images/id_3828_400_300.jpg
3585	6.87229	0.592526	5.32748	0.829657	6.56508	0.540462	40.6962	-73.8889	New York City	103	3	/images/id_3585_400_300.jpg
4282	1.42875	0.488132	4.5952	0.724664	0.876377	0.58939	40.664	-73.899	New York City	302	10	/images/id_4282_400_300.jpg
4283	4.16633	0.574397	5.27761	0.720251	3.97797	0.614846	40.7459	-73.9127	New York City	48	6	/images/id_4283_400_300.jpg
4280	5.16434	0.58706	4.68671	0.815458	4.80231	0.705685	40.7756	-73.9292	New York City	23	13	/images/id_4280_400_300.jpg
4281	3.02347	0.568206	4.17423	0.61589	2.70019	0.497414	40.7422	-73.874	New York City	356	15	/images/id_4281_400_300.jpg
4286	4.12257	0.500682	4.36558	0.707378	4.01186	0.591724	40.6586	-73.9226	New York City	4	11	/images/id_4286_400_300.jpg
4287	3.14382	0.527516	4.36858	0.810727	2.10904	0.586332	40.6581	-73.9064	New York City	33	9	/images/id_4287_400_300.jpg
4284	4.00126	0.455618	2.02138	0.600943	3.71382	0.598651	40.5954	-73.9898	New York City	351	11	/images/id_4284_400_300.jpg
4285	4.97906	0.521179	3.39121	0.670597	2.73774	0.587881	40.6854	-73.9748	New York City	37	9	/images/id_4285_400_300.jpg
4288	2.61018	0.469637	4.33241	0.711432	1.97838	0.367305	40.6135	-73.9546	New York City	119	5	/images/id_4288_400_300.jpg
4289	5.11601	0.569328	6.13921	0.897812	4.55926	0.647793	40.7821	-73.9202	New York City	358	5	/images/id_4289_400_300.jpg
3044	2.94635	0.14464	5.21286	0.638252	3.38809	0.366258	47.7935	13.0563	Salzburg	NULL	NULL	/images/id_3044_400_300.jpg
368	5.11812	0.466024	4.89835	0.602072	6.51076	0.478328	40.7047	-73.9617	New York City	171	1	/images/id_368_400_300.jpg
369	5.268	0.41305	6.3276	0.735305	4.67277	0.500132	40.7118	-73.9969	New York City	324	11	/images/id_369_400_300.jpg
366	5.34856	0.530805	3.83824	0.669969	4.10198	0.498334	40.7226	-73.8499	New York City	121	6	/images/id_366_400_300.jpg
367	4.23915	0.466874	5.15984	0.501802	3.30004	0.421912	40.7745	-73.9367	New York City	231	4	/images/id_367_400_300.jpg
364	6.03199	0.459421	6.04776	0.674464	5.62507	0.656247	40.8145	-73.9516	New York City	151	6	/images/id_364_400_300.jpg
365	4.34819	0.454164	4.42389	0.718971	5.48126	0.698967	40.7045	-73.8608	New York City	210	1	/images/id_365_400_300.jpg
362	3.85179	0.408752	4.90867	0.857102	4.494	0.605675	40.8247	-73.9108	New York City	260	-3	/images/id_362_400_300.jpg
363	5.00046	0.542184	5.63573	0.756065	6.52505	0.61672	40.7127	-74.0075	New York City	240	8	/images/id_363_400_300.jpg
360	4.86679	0.505087	5.42675	0.753692	4.94989	0.518194	40.8094	-73.9376	New York City	280	7	/images/id_360_400_300.jpg
361	5.22982	0.569389	3.75378	0.533622	5.33753	0.692856	40.6274	-74.0403	New York City	237	5	/images/id_361_400_300.jpg
1368	6.09472	0.53154	5.56862	0.507226	6.65315	0.339044	42.3112	-71.0868	Boston	155	7	/images/id_1368_400_300.jpg
380	4.62673	0.427774	4.53007	0.647061	4.27393	0.550567	40.5983	-73.9553	New York City	152	1	/images/id_380_400_300.jpg
381	5.02094	0.528514	6.47146	0.491932	6.18797	0.492914	40.7566	-73.9882	New York City	147	9	/images/id_381_400_300.jpg
382	5.35462	0.458804	4.13042	0.53576	4.78438	0.618786	40.7264	-73.9862	New York City	181	5	/images/id_382_400_300.jpg
383	5.17181	0.424361	3.96562	0.467545	5.50541	0.645095	40.8237	-73.9552	New York City	18	1	/images/id_383_400_300.jpg
384	3.98583	0.386244	3.48652	0.46091	3.53947	0.443715	40.6709	-73.88	New York City	143	4	/images/id_384_400_300.jpg
385	5.41518	0.435631	5.80266	0.744271	5.78448	0.554447	40.6862	-73.9576	New York City	226	0	/images/id_385_400_300.jpg
386	5.05537	0.499028	3.34488	0.424901	4.35035	0.480356	40.6279	-73.9321	New York City	243	-1	/images/id_386_400_300.jpg
387	5.47452	0.512502	5.14834	0.798205	5.07475	0.425148	40.6439	-73.9382	New York City	204	2	/images/id_387_400_300.jpg
388	4.89184	0.472834	4.5992	0.694175	4.11373	0.545054	40.6908	-73.8413	New York City	199	0	/images/id_388_400_300.jpg
389	5.50241	0.526234	5.29306	0.822249	6.24959	0.544892	40.6593	-73.9521	New York City	297	2	/images/id_389_400_300.jpg
4758	4.02338	0.473946	3.21842	0.864989	4.88777	0.70329	42.3982	-71.1234	Boston	9	8	/images/id_4758_400_300.jpg
4759	4.51265	0.528137	5.10304	0.620496	5.04903	0.682637	42.3666	-71.0367	Boston	95	8	/images/id_4759_400_300.jpg
1369	6.04543	0.466897	5.518	0.753716	5.11324	0.494588	42.2915	-71.0495	Boston	189	7	/images/id_1369_400_300.jpg
4750	6.80795	0.574848	5.13442	0.695955	6.93383	0.51138	42.3773	-71.1064	Boston	1	2	/images/id_4750_400_300.jpg
4751	3.32135	0.489332	4.29967	0.691885	3.80643	0.558976	42.3085	-71.0727	Boston	11	3	/images/id_4751_400_300.jpg
4752	4.80381	0.608311	4.98658	0.797529	3.74237	0.594857	42.3268	-71.0555	Boston	21	5	/images/id_4752_400_300.jpg
4753	3.94083	0.483448	6.18911	0.748893	3.44926	0.647542	42.3578	-71.148	Boston	223	2	/images/id_4753_400_300.jpg
4754	5.66937	0.541531	3.95087	0.688031	3.41525	0.568454	42.2981	-71.0624	Boston	277	-1	/images/id_4754_400_300.jpg
4755	4.90312	0.48068	5.92927	0.777826	6.70005	0.536612	42.3315	-71.0364	Boston	315	5	/images/id_4755_400_300.jpg
4756	7.23916	0.544497	5.9091	0.552735	6.49383	0.583972	42.3424	-71.1376	Boston	341	7	/images/id_4756_400_300.jpg
4757	2.0616	0.46365	3.25534	0.676256	2.60448	0.560983	42.3423	-71.0541	Boston	339	3	/images/id_4757_400_300.jpg
3759	2.44036	0.445384	4.90504	0.865263	3.73983	0.516471	40.8895	-73.9001	New York City	30	0	/images/id_3759_400_300.jpg
3758	5.37368	0.490687	3.94803	0.795031	4.91534	0.561202	40.806	-73.9542	New York City	354	1	/images/id_3758_400_300.jpg
1115	5.77052	0.485063	6.50872	0.562137	5.66134	0.602222	42.3441	-71.1285	Boston	176	0	/images/id_1115_400_300.jpg
3751	5.01907	0.525324	3.53345	0.731703	5.2057	0.544328	40.7047	-73.8359	New York City	24	2	/images/id_3751_400_300.jpg
3750	3.33024	0.609813	3.68484	0.658495	2.42065	0.629571	40.6588	-73.9018	New York City	40	2	/images/id_3750_400_300.jpg
3753	5.44384	0.604884	5.68358	0.7028	5.46122	0.564298	40.7532	-73.8755	New York City	27	2	/images/id_3753_400_300.jpg
3752	3.54893	0.532373	4.3617	0.703312	1.65636	0.463223	40.6803	-73.9477	New York City	40	4	/images/id_3752_400_300.jpg
3755	5.17269	0.562791	4.14003	0.786262	3.82018	0.536129	40.6761	-73.9658	New York City	322	1	/images/id_3755_400_300.jpg
3754	6.79358	0.544864	5.59456	0.835696	6.28252	0.56868	40.7575	-73.9323	New York City	356	0	/images/id_3754_400_300.jpg
3757	3.88168	0.558594	4.087	0.705564	5.20099	0.534676	40.6149	-73.9296	New York City	351	1	/images/id_3757_400_300.jpg
3756	5.05399	0.533863	6.40618	0.692774	6.12971	0.645468	40.6996	-73.9869	New York City	338	5	/images/id_3756_400_300.jpg
2190	4.00679	0.53715	5.86757	0.670338	4.39017	0.501052	48.308	14.2803	Linz	NULL	NULL	/images/id_2190_400_300.jpg
4632	5.93729	0.527611	4.48252	0.678097	7.02381	0.640306	42.3727	-71.1258	Boston	345	5	/images/id_4632_400_300.jpg
2192	4.84392	0.51038	5.391	0.602012	3.91106	0.45466	48.308	14.2803	Linz	NULL	NULL	/images/id_2192_400_300.jpg
2193	6.05509	0.469803	5.19302	0.596349	6.61867	0.501059	48.3067	14.2832	Linz	NULL	NULL	/images/id_2193_400_300.jpg
2194	5.15751	0.465573	4.02087	0.62181	5.82193	0.578605	48.3095	14.2807	Linz	NULL	NULL	/images/id_2194_400_300.jpg
2195	4.6319	0.514149	3.77285	0.640905	5.09257	0.611857	48.3097	14.2803	Linz	NULL	NULL	/images/id_2195_400_300.jpg
4635	4.10762	0.492673	3.40047	0.724589	4.25152	0.592001	42.3383	-71.097	Boston	147	11	/images/id_4635_400_300.jpg
2197	4.03393	0.489814	4.38487	0.630235	4.39527	0.546161	48.3103	14.2815	Linz	NULL	NULL	/images/id_2197_400_300.jpg
2198	5.51842	0.454731	5.26955	0.668286	6.68543	0.393674	48.3103	14.2817	Linz	NULL	NULL	/images/id_2198_400_300.jpg
2199	4.01995	0.417293	5.78238	0.661909	3.54611	0.521114	48.3105	14.2823	Linz	NULL	NULL	/images/id_2199_400_300.jpg
4639	5.20896	0.587423	3.37161	0.656295	4.72663	0.579934	42.368	-71.055	Boston	326	1	/images/id_4639_400_300.jpg
4638	7.63373	0.537027	7.46074	0.701206	9.18022	0.705854	42.313	-71.0943	Boston	349	0	/images/id_4638_400_300.jpg
256	3.94633	0.435009	3.92766	0.638723	4.52559	0.507179	40.6541	-73.9796	New York City	214	-2	/images/id_256_400_300.jpg
257	5.70616	0.483158	5.6935	0.74198	3.66953	0.408224	40.7653	-73.9139	New York City	191	0	/images/id_257_400_300.jpg
254	4.5636	0.477288	4.20973	0.534533	5.23133	0.555271	40.6097	-73.9103	New York City	182	0	/images/id_254_400_300.jpg
2201	4.02869	0.461268	4.71624	0.713746	4.44024	0.549559	48.3067	14.288	Linz	NULL	NULL	/images/id_2201_400_300.jpg
2203	5.05457	0.389908	6.37193	0.618149	6.04467	0.517907	48.3067	14.2878	Linz	NULL	NULL	/images/id_2203_400_300.jpg
2204	5.05411	0.456732	5.82156	0.712249	6.41776	0.531773	48.3067	14.2878	Linz	NULL	NULL	/images/id_2204_400_300.jpg
2205	6.93203	0.375711	7.28855	0.271332	6.07369	0.508821	48.3067	14.2878	Linz	NULL	NULL	/images/id_2205_400_300.jpg
2206	5.50466	0.476394	7.01142	0.633805	5.54234	0.591662	48.3067	14.2863	Linz	NULL	NULL	/images/id_2206_400_300.jpg
2207	4.72937	0.430464	6.09679	0.553557	4.92911	0.535395	48.3063	14.2882	Linz	NULL	NULL	/images/id_2207_400_300.jpg
2208	4.16839	0.513744	3.75865	0.628534	4.44839	0.465194	48.3063	14.2882	Linz	NULL	NULL	/images/id_2208_400_300.jpg
2209	6.19216	0.42886	4.94078	0.621685	5.48101	0.580238	48.3025	14.2913	Linz	NULL	NULL	/images/id_2209_400_300.jpg
476	5.54642	0.455889	4.79939	0.754145	6.30101	0.483037	40.7927	-73.8262	New York City	135	3	/images/id_476_400_300.jpg
2046	5.39264	0.328587	5.34346	0.63442	4.30628	0.502154	48.3112	14.2835	Linz	NULL	NULL	/images/id_2046_400_300.jpg
4812	2.73634	0.500265	2.57156	0.791184	1.79534	0.580894	42.2904	-71.0883	Boston	12	8	/images/id_4812_400_300.jpg
4811	2.18891	0.426414	2.10278	0.708673	2.18766	0.538724	42.298	-71.0627	Boston	322	2	/images/id_4811_400_300.jpg
2045	5.17316	0.408507	4.93156	0.697189	5.53669	0.544509	48.3123	14.2878	Linz	NULL	NULL	/images/id_2045_400_300.jpg
168	6.41808	0.42091	5.00066	0.695821	6.09136	0.552277	40.6906	-73.8301	New York City	133	0	/images/id_168_400_300.jpg
169	4.45708	0.456435	4.55634	0.691654	3.87169	0.438306	40.6667	-73.8544	New York City	208	1	/images/id_169_400_300.jpg
164	5.72336	0.449587	5.81672	0.656191	4.41191	0.582983	40.6123	-73.9957	New York City	152	4	/images/id_164_400_300.jpg
2042	3.67774	0.434154	4.02358	0.596534	5.37502	0.533604	48.3112	14.2833	Linz	NULL	NULL	/images/id_2042_400_300.jpg
166	4.42784	0.48358	4.78525	0.744894	4.5738	0.558144	40.7419	-73.8518	New York City	265	2	/images/id_166_400_300.jpg
167	4.53234	0.54613	4.05992	0.470453	4.51577	0.546038	40.6534	-73.8436	New York City	117	5	/images/id_167_400_300.jpg
160	3.27797	0.313648	3.50617	0.573834	3.74708	0.48759	40.6567	-73.8403	New York City	138	1	/images/id_160_400_300.jpg
161	5.85393	0.439507	5.84113	0.619556	4.90338	0.625874	40.8058	-73.943	New York City	146	4	/images/id_161_400_300.jpg
162	5.19182	0.419188	6.07629	0.683108	6.30474	0.538373	40.7508	-73.9923	New York City	146	7	/images/id_162_400_300.jpg
163	4.72671	0.544502	5.14026	0.76361	4.09194	0.509733	40.706	-73.874	New York City	194	1	/images/id_163_400_300.jpg
4839	5.40349	0.570483	6.72092	0.835677	6.50572	0.563578	42.3494	-71.0638	Boston	56	6	/images/id_4839_400_300.jpg
4838	4.24439	0.594041	4.07947	0.867422	3.2869	0.580443	42.3122	-71.071	Boston	345	8	/images/id_4838_400_300.jpg
3689	4.9895	0.54224	6.20896	0.799691	5.49933	0.62004	40.6883	-74.0185	New York City	348	1	/images/id_3689_400_300.jpg
3688	1.06115	0.420291	3.00893	0.765021	1.52267	0.499955	40.6645	-73.8714	New York City	184	1	/images/id_3688_400_300.jpg
4815	2.35887	0.428105	3.47539	0.582835	1.07868	0.610652	42.3108	-71.0713	Boston	12	4	/images/id_4815_400_300.jpg
4529	5.80852	0.559184	5.06077	0.729964	4.83433	0.604305	42.3367	-71.1351	Boston	21	2	/images/id_4529_400_300.jpg
4528	1.43646	0.460927	2.47802	0.61992	1.74894	0.495667	42.3818	-71.0249	Boston	191	0	/images/id_4528_400_300.jpg
4831	7.94811	0.497703	5.81004	0.833381	7.40908	0.603206	42.3456	-71.1339	Boston	341	11	/images/id_4831_400_300.jpg
4526	2.81364	0.470328	4.01697	0.643783	3.16876	0.559562	42.4036	-71.13	Boston	10	3	/images/id_4526_400_300.jpg
4525	5.64091	0.592332	4.27775	0.77313	4.94166	0.548277	42.3514	-71.1297	Boston	334	-2	/images/id_4525_400_300.jpg
4524	5.41521	0.464216	4.90598	0.792784	5.73437	0.612605	42.3919	-71.1174	Boston	175	0	/images/id_4524_400_300.jpg
3687	4.01957	0.516595	2.79687	0.655785	2.93428	0.513999	40.5957	-73.9507	New York City	26	1	/images/id_3687_400_300.jpg
3686	6.36201	0.550586	4.93041	0.903512	5.20724	0.655555	40.7741	-73.9808	New York City	332	1	/images/id_3686_400_300.jpg
4521	4.72162	0.601902	3.24875	0.814039	5.04629	0.553727	42.3201	-71.0886	Boston	338	0	/images/id_4521_400_300.jpg
3684	2.20949	0.469932	2.13039	0.702453	2.55658	0.540514	40.8283	-73.9201	New York City	3	7	/images/id_3684_400_300.jpg
4422	6.92301	0.4988	5.20644	0.723266	7.62724	0.68763	42.3314	-71.0379	Boston	317	2	/images/id_4422_400_300.jpg
4423	4.65006	0.618254	3.62821	0.653275	4.47302	0.592743	42.359	-71.1269	Boston	20	-1	/images/id_4423_400_300.jpg
908	4.42763	0.424191	4.5633	0.758075	3.72603	0.373416	40.6916	-73.9098	New York City	144	1	/images/id_908_400_300.jpg
1840	3.98373	0.473325	4.54294	0.605665	4.69342	0.603433	48.2717	14.2988	Linz	NULL	NULL	/images/id_1840_400_300.jpg
4426	0.946528	0.555271	4.05543	0.708786	1.27391	0.454749	42.3909	-71.0409	Boston	74	6	/images/id_4426_400_300.jpg
4427	6.67965	0.486927	6.82497	0.709556	6.36188	0.668903	42.3262	-71.0778	Boston	3	6	/images/id_4427_400_300.jpg
3531	4.64408	0.478812	3.69856	0.574493	2.69246	0.550571	40.6994	-73.9471	New York City	67	6	/images/id_3531_400_300.jpg
3530	2.15919	0.481175	2.04027	0.54626	2.12539	0.498286	40.7329	-73.8839	New York City	177	3	/images/id_3530_400_300.jpg
3533	3.25948	0.452938	1.82856	0.638966	2.9223	0.541348	40.657	-73.9802	New York City	55	2	/images/id_3533_400_300.jpg
3532	2.59805	0.475928	3.45935	0.788735	3.24071	0.508098	40.6007	-73.9939	New York City	6	0	/images/id_3532_400_300.jpg
3535	6.9296	0.57506	6.22448	0.684831	8.43842	0.511521	40.7134	-73.8377	New York City	4	0	/images/id_3535_400_300.jpg
3534	6.66027	0.525243	4.37123	0.818247	7.42105	0.683513	40.6015	-73.9695	New York City	19	4	/images/id_3534_400_300.jpg
3537	4.5324	0.579205	4.79056	0.815131	3.3661	0.722451	40.8002	-73.9375	New York City	335	0	/images/id_3537_400_300.jpg
3536	0.821258	0.419163	2.40191	0.480515	1.16779	0.51693	40.6683	-73.8998	New York City	16	-2	/images/id_3536_400_300.jpg
3539	1.76606	0.547549	2.11239	0.819015	1.22313	0.554762	40.6384	-74.022	New York City	342	0	/images/id_3539_400_300.jpg
3538	7.30012	0.643003	4.84465	0.804794	6.46779	0.572932	40.6334	-74.017	New York City	160	1	/images/id_3538_400_300.jpg
1844	5.08102	0.497668	5.35644	0.612694	3.95326	0.548526	48.2698	14.2997	Linz	NULL	NULL	/images/id_1844_400_300.jpg
1814	4.39674	0.463781	4.02088	0.521328	5.55094	0.57856	48.2688	14.2927	Linz	NULL	NULL	/images/id_1814_400_300.jpg
1815	6.13067	0.38029	5.29773	0.69776	6.38031	0.455689	48.2682	14.293	Linz	NULL	NULL	/images/id_1815_400_300.jpg
1816	4.7572	0.566277	4.45404	0.723292	5.48469	0.539521	48.268	14.293	Linz	NULL	NULL	/images/id_1816_400_300.jpg
1817	4.31218	0.432663	5.61455	0.53248	4.79472	0.504781	48.2683	14.293	Linz	NULL	NULL	/images/id_1817_400_300.jpg
1810	4.82082	0.546585	4.69235	0.722484	5.8949	0.461631	48.2687	14.2913	Linz	NULL	NULL	/images/id_1810_400_300.jpg
1811	5.03385	0.472843	3.91865	0.611739	5.5125	0.685194	48.2692	14.2918	Linz	NULL	NULL	/images/id_1811_400_300.jpg
1812	4.87072	0.513528	4.81524	0.613293	5.32545	0.577468	48.2692	14.2927	Linz	NULL	NULL	/images/id_1812_400_300.jpg
1813	6.1091	0.456747	6.64871	0.622784	4.91091	0.619234	48.2692	14.2927	Linz	NULL	NULL	/images/id_1813_400_300.jpg
4339	4.26117	0.538475	3.91207	0.750204	4.66488	0.627396	42.3848	-71.1278	Boston	23	0	/images/id_4339_400_300.jpg
1818	4.36251	0.468506	4.59651	0.756296	5.0198	0.625686	48.2692	14.2922	Linz	NULL	NULL	/images/id_1818_400_300.jpg
1819	5.79241	0.498593	5.30429	0.766257	5.28117	0.426481	48.2692	14.2922	Linz	NULL	NULL	/images/id_1819_400_300.jpg
4336	4.84623	0.601874	4.41278	0.817162	3.15587	0.641886	42.316	-71.0988	Boston	351	3	/images/id_4336_400_300.jpg
4337	6.00027	0.531505	3.79471	0.69721	5.93625	0.602121	42.3764	-71.1357	Boston	195	0	/images/id_4337_400_300.jpg
4334	7.02054	0.514075	4.67606	0.784639	6.85014	0.588344	42.3888	-71.1283	Boston	11	3	/images/id_4334_400_300.jpg
4335	5.99355	0.556008	5.73805	0.819245	5.98795	0.552395	42.3695	-71.1061	Boston	14	3	/images/id_4335_400_300.jpg
670	3.35836	0.312894	4.37315	0.628261	3.20386	0.326132	40.67	-73.8807	New York City	188	4	/images/id_670_400_300.jpg
1087	4.14388	0.420253	4.37282	0.549276	4.00054	0.609654	42.334	-71.0535	Boston	110	3	/images/id_1087_400_300.jpg
4333	1.93787	0.530714	3.7377	0.867401	2.23432	0.581984	42.3732	-71.0664	Boston	338	8	/images/id_4333_400_300.jpg
672	6.01865	0.41433	6.06673	0.550979	4.43342	0.529305	40.7535	-73.9966	New York City	152	8	/images/id_672_400_300.jpg
2164	5.38933	0.454529	5.09889	0.599142	5.62744	0.504787	48.3143	14.2757	Linz	NULL	NULL	/images/id_2164_400_300.jpg
673	5.69361	0.445785	6.33656	0.431952	6.17024	0.474719	40.7228	-73.9978	New York City	183	6	/images/id_673_400_300.jpg
1609	4.75452	0.399537	5.29315	0.597441	5.55074	0.63212	48.311	14.2832	Linz	NULL	NULL	/images/id_1609_400_300.jpg
1608	4.33171	0.482465	5.03158	0.66466	5.15384	0.526739	48.311	14.2817	Linz	NULL	NULL	/images/id_1608_400_300.jpg
2166	4.06784	0.423246	5.28789	0.67954	3.48933	0.497589	48.3135	14.2762	Linz	NULL	NULL	/images/id_2166_400_300.jpg
3229	5.38481	0.375699	5.60351	0.699022	5.52132	0.494302	47.8092	13.05	Salzburg	NULL	NULL	/images/id_3229_400_300.jpg
3228	5.19103	0.53395	6.1158	0.720725	6.33348	0.559025	47.8085	13.0502	Salzburg	NULL	NULL	/images/id_3228_400_300.jpg
1979	4.51567	0.40129	4.48961	0.710395	5.12986	0.502046	48.2963	14.3128	Linz	NULL	NULL	/images/id_1979_400_300.jpg
1978	5.56532	0.486235	5.6021	0.786981	6.21064	0.520372	48.2958	14.3113	Linz	NULL	NULL	/images/id_1978_400_300.jpg
3225	5.31226	0.545365	5.49202	0.645537	6.17755	0.647714	47.8098	13.0507	Salzburg	NULL	NULL	/images/id_3225_400_300.jpg
1976	4.38764	0.4475	4.57791	0.71862	3.79262	0.463967	48.2972	14.3102	Linz	NULL	NULL	/images/id_1976_400_300.jpg
3227	7.21799	0.342955	6.35112	0.694628	6.87075	0.306983	47.8097	13.0493	Salzburg	NULL	NULL	/images/id_3227_400_300.jpg
1974	4.17162	0.46094	3.9819	0.605925	4.01395	0.528445	48.2975	14.3097	Linz	NULL	NULL	/images/id_1974_400_300.jpg
1973	5.3085	0.50676	4.69079	0.703173	5.77722	0.501213	48.2973	14.3108	Linz	NULL	NULL	/images/id_1973_400_300.jpg
1972	5.30381	0.536841	5.10522	0.836773	4.45451	0.516685	48.2975	14.3122	Linz	NULL	NULL	/images/id_1972_400_300.jpg
3223	4.88054	0.512589	4.70918	0.697413	6.14284	0.594534	47.8132	13.0502	Salzburg	NULL	NULL	/images/id_3223_400_300.jpg
3222	3.62841	0.521347	4.22824	0.565293	3.58889	0.394656	47.8148	13.0495	Salzburg	NULL	NULL	/images/id_3222_400_300.jpg
809	3.71849	0.438445	3.64116	0.659475	3.1817	0.415772	40.7685	-73.8981	New York City	195	4	/images/id_809_400_300.jpg
808	3.26259	0.328726	5.22195	0.804296	3.28614	0.317693	40.6587	-73.8757	New York City	313	0	/images/id_808_400_300.jpg
803	5.89324	0.464969	6.57209	0.518501	7.35736	0.330523	40.61	-73.9485	New York City	214	2	/images/id_803_400_300.jpg
802	4.00679	0.43885	5.32668	0.774325	4.00263	0.470904	40.665	-73.8519	New York City	211	1	/images/id_802_400_300.jpg
801	3.89424	0.479126	6.06831	0.543517	6.11949	0.45097	40.7557	-73.9763	New York City	262	2	/images/id_801_400_300.jpg
800	5.17237	0.50965	6.23319	0.684894	5.84631	0.452811	40.7967	-73.9329	New York City	152	3	/images/id_800_400_300.jpg
807	4.39113	0.501359	3.78168	0.553848	4.20681	0.511494	40.854	-73.9158	New York City	184	3	/images/id_807_400_300.jpg
806	4.7219	0.47897	5.27521	0.764004	3.56047	0.364599	40.7443	-73.8968	New York City	145	8	/images/id_806_400_300.jpg
805	5.49687	0.517054	6.87722	0.653083	4.17163	0.352514	40.7184	-73.9601	New York City	168	2	/images/id_805_400_300.jpg
804	5.71528	0.501089	5.16867	0.692434	5.29416	0.548209	40.662	-73.8609	New York City	204	1	/images/id_804_400_300.jpg
3320	5.11023	0.536407	4.63428	0.631332	5.31153	0.562838	47.799	13.0242	Salzburg	NULL	NULL	/images/id_3320_400_300.jpg
3321	4.65831	0.36332	3.91527	0.662668	4.71092	0.516448	47.7992	13.0242	Salzburg	NULL	NULL	/images/id_3321_400_300.jpg
3322	5.84262	0.523331	4.75762	0.698484	6.08699	0.459258	47.7993	13.023	Salzburg	NULL	NULL	/images/id_3322_400_300.jpg
3323	5.58395	0.519864	4.51308	0.619194	5.80691	0.553727	47.8013	13.0243	Salzburg	NULL	NULL	/images/id_3323_400_300.jpg
3324	4.67334	0.334893	5.79749	0.801323	5.24947	0.543671	47.8018	13.026	Salzburg	NULL	NULL	/images/id_3324_400_300.jpg
3325	5.58661	0.433008	5.96721	0.711137	5.43552	0.528373	47.8027	13.0283	Salzburg	NULL	NULL	/images/id_3325_400_300.jpg
3326	6.14885	0.406716	6.40993	0.568652	5.89115	0.509021	47.8028	13.0277	Salzburg	NULL	NULL	/images/id_3326_400_300.jpg
3327	5.8299	0.475976	5.82306	0.579552	5.97524	0.575009	47.8027	13.0273	Salzburg	NULL	NULL	/images/id_3327_400_300.jpg
3328	4.27134	0.459004	6.05429	0.571105	4.83756	0.483889	47.8043	13.0268	Salzburg	NULL	NULL	/images/id_3328_400_300.jpg
3329	5.85736	0.486774	5.83089	0.633527	5.11353	0.582873	47.8083	13.0268	Salzburg	NULL	NULL	/images/id_3329_400_300.jpg
1775	4.89719	0.485234	4.76115	0.722269	3.8648	0.573593	48.2685	14.2842	Linz	NULL	NULL	/images/id_1775_400_300.jpg
1774	5.69161	0.473014	4.72129	0.714796	4.3997	0.542807	48.2685	14.2842	Linz	NULL	NULL	/images/id_1774_400_300.jpg
1777	4.85991	0.560523	4.23437	0.884743	6.29041	0.53861	48.2672	14.2857	Linz	NULL	NULL	/images/id_1777_400_300.jpg
1776	4.97048	0.430962	4.1534	0.656764	5.31753	0.554866	48.2672	14.2857	Linz	NULL	NULL	/images/id_1776_400_300.jpg
1771	5.25818	0.459811	4.17932	0.667505	4.86216	0.557831	48.2688	14.2775	Linz	NULL	NULL	/images/id_1771_400_300.jpg
1770	4.75543	0.47499	4.215	0.468462	4.40587	0.499813	48.2688	14.2773	Linz	NULL	NULL	/images/id_1770_400_300.jpg
1773	3.37386	0.407425	3.08531	0.403599	4.08626	0.594168	48.2685	14.2842	Linz	NULL	NULL	/images/id_1773_400_300.jpg
1772	4.96254	0.450227	4.39642	0.653834	5.15318	0.66277	48.2688	14.2775	Linz	NULL	NULL	/images/id_1772_400_300.jpg
1779	5.5592	0.460315	4.49111	0.681003	4.23801	0.526099	48.2672	14.2857	Linz	NULL	NULL	/images/id_1779_400_300.jpg
1778	4.83618	0.443262	6.36727	0.599436	5.71445	0.579993	48.2672	14.2857	Linz	NULL	NULL	/images/id_1778_400_300.jpg
321	5.46788	0.430752	4.99625	0.757596	3.55181	0.414567	40.7575	-73.9323	New York City	176	0	/images/id_321_400_300.jpg
3975	6.1908	0.569027	3.85387	0.671498	6.74621	0.677185	40.6132	-73.9566	New York City	73	2	/images/id_3975_400_300.jpg
3957	6.20131	0.530098	5.46299	0.633923	6.8271	0.59517	40.7418	-73.9529	New York City	306	-1	/images/id_3957_400_300.jpg
3974	4.43204	0.526295	4.60826	0.777557	4.56406	0.576656	40.6732	-73.8501	New York City	10	4	/images/id_3974_400_300.jpg
1083	5.05773	0.633571	4.48426	0.757607	5.92717	0.548083	42.3645	-71.1144	Boston	119	5	/images/id_1083_400_300.jpg
1159	7.14278	0.267675	6.48576	0.574309	5.92515	0.544712	42.3188	-71.0917	Boston	2	5	/images/id_1159_400_300.jpg
1158	4.66457	0.52695	4.60504	0.640189	4.26692	0.564659	42.4034	-71.1075	Boston	45	2	/images/id_1158_400_300.jpg
1155	3.36927	0.332608	3.4621	0.413878	3.39495	0.469137	42.385	-71.0758	Boston	102	-2	/images/id_1155_400_300.jpg
1154	6.74236	0.361192	4.31136	0.622542	5.6712	0.526011	42.3437	-71.1492	Boston	82	0	/images/id_1154_400_300.jpg
1157	4.62816	0.526037	3.73799	0.580442	3.74962	0.440517	42.3165	-71.0942	Boston	125	0	/images/id_1157_400_300.jpg
1156	6.06668	0.423148	5.11748	0.733389	5.37956	0.530517	42.387	-71.1066	Boston	38	5	/images/id_1156_400_300.jpg
1151	3.96554	0.451785	5.17144	0.801674	4.14376	0.466733	42.3884	-71.0329	Boston	156	6	/images/id_1151_400_300.jpg
1150	6.73856	0.317842	6.22784	0.689036	6.19758	0.542806	42.3452	-71.0744	Boston	115	0	/images/id_1150_400_300.jpg
1153	5.51217	0.470685	5.24784	0.660781	4.85383	0.593475	42.3827	-71.1273	Boston	317	-1	/images/id_1153_400_300.jpg
1152	4.55181	0.423847	4.34717	0.642767	5.14657	0.542602	42.3526	-71.1281	Boston	144	4	/images/id_1152_400_300.jpg
59	3.51636	0.454262	4.15708	0.610471	3.94228	0.435735	40.7329	-73.8839	New York City	333	1	/images/id_59_400_300.jpg
58	3.61836	0.363679	3.68837	0.563049	3.97521	0.50064	40.7088	-73.8958	New York City	185	-2	/images/id_58_400_300.jpg
2998	4.1702	0.571107	4.8078	0.796216	4.40897	0.449072	47.8027	13.0172	Salzburg	NULL	NULL	/images/id_2998_400_300.jpg
2999	4.77198	0.527618	3.6917	0.51945	5.27904	0.424245	47.8012	13.0163	Salzburg	NULL	NULL	/images/id_2999_400_300.jpg
3038	5.04125	0.375473	4.30465	0.655513	4.64701	0.511225	47.7892	13.0512	Salzburg	NULL	NULL	/images/id_3038_400_300.jpg
3039	5.17904	0.399957	4.60028	0.689295	4.18656	0.515205	47.7922	13.0525	Salzburg	NULL	NULL	/images/id_3039_400_300.jpg
3034	5.72371	0.471598	4.67111	0.707631	5.72129	0.498903	47.7887	13.0625	Salzburg	NULL	NULL	/images/id_3034_400_300.jpg
54	4.94096	0.488318	5.9132	0.78341	5.67913	0.457654	40.6677	-73.9908	New York City	178	10	/images/id_54_400_300.jpg
2992	4.76007	0.429604	4.79433	0.707937	4.81915	0.590864	47.8057	13.023	Salzburg	NULL	NULL	/images/id_2992_400_300.jpg
56	6.74771	0.401065	6.37765	0.7106	6.27989	0.485714	40.6795	-73.9731	New York City	144	3	/images/id_56_400_300.jpg
51	5.77073	0.505251	4.10138	0.776915	5.28607	0.574674	40.6434	-73.8879	New York City	199	2	/images/id_51_400_300.jpg
2995	4.82979	0.458289	4.81205	0.680098	4.52051	0.784185	47.8042	13.019	Salzburg	NULL	NULL	/images/id_2995_400_300.jpg
2996	4.47585	0.428115	5.80245	0.664382	4.36251	0.642501	47.804	13.018	Salzburg	NULL	NULL	/images/id_2996_400_300.jpg
52	6.5353	0.372323	5.73958	0.707673	6.78959	0.423528	40.6748	-73.9643	New York City	254	2	/images/id_52_400_300.jpg
537	5.89837	0.523917	5.86164	0.688547	6.31079	0.519312	40.7006	-73.9146	New York City	193	4	/images/id_537_400_300.jpg
536	4.42979	0.40094	5.59117	0.577869	4.70846	0.612982	40.7561	-73.9136	New York City	200	2	/images/id_536_400_300.jpg
535	4.51484	0.45885	4.32786	0.603672	5.45611	0.544216	40.5845	-73.9521	New York City	131	2	/images/id_535_400_300.jpg
534	3.82599	0.41779	3.8559	0.509259	4.38632	0.507943	40.8204	-73.9579	New York City	118	8	/images/id_534_400_300.jpg
533	6.0716	0.384721	3.89252	0.547818	3.87881	0.483446	40.6002	-73.9567	New York City	186	9	/images/id_533_400_300.jpg
532	3.67674	0.373883	2.83297	0.37987	3.98248	0.77355	40.6245	-73.9811	New York City	192	6	/images/id_532_400_300.jpg
531	5.78795	0.449098	5.93588	0.651087	6.4295	0.394607	40.7259	-73.8474	New York City	225	0	/images/id_531_400_300.jpg
3035	4.62851	0.357834	4.23813	0.67033	4.53101	0.581451	47.7893	13.0655	Salzburg	NULL	NULL	/images/id_3035_400_300.jpg
3036	4.34537	0.485127	4.14057	0.623181	3.68027	0.390858	47.7892	13.066	Salzburg	NULL	NULL	/images/id_3036_400_300.jpg
539	4.266	0.467602	4.0156	0.576779	4.63867	0.56385	40.8427	-73.918	New York City	192	7	/images/id_539_400_300.jpg
538	3.77207	0.422446	4.51984	0.609146	3.91497	0.46275	40.6801	-74.017	New York City	145	8	/images/id_538_400_300.jpg
2993	5.64198	0.545001	5.53134	0.680984	5.42434	0.663133	47.8057	13.02	Salzburg	NULL	NULL	/images/id_2993_400_300.jpg
3030	5.23811	0.459059	4.95289	0.608277	5.08318	0.596212	47.7827	13.0515	Salzburg	NULL	NULL	/images/id_3030_400_300.jpg
3541	6.27257	0.568808	5.69404	0.804274	4.54674	0.620834	40.6368	-73.9982	New York City	341	1	/images/id_3541_400_300.jpg
50	5.62326	0.443249	6.01251	0.688033	4.29242	0.741351	40.6775	-73.8485	New York City	195	0	/images/id_50_400_300.jpg
3294	5.30162	0.616032	4.8348	0.667535	4.37297	0.582472	47.797	13.0263	Salzburg	NULL	NULL	/images/id_3294_400_300.jpg
53	4.36032	0.30987	4.70078	0.70947	5.18203	0.564729	40.6135	-74.0073	New York City	181	0	/images/id_53_400_300.jpg
3295	6.03246	0.412133	5.68806	0.766738	5.19111	0.577617	47.7972	13.0257	Salzburg	NULL	NULL	/images/id_3295_400_300.jpg
3033	4.19593	0.504841	5.52176	0.619152	4.67155	0.567569	47.7873	13.0617	Salzburg	NULL	NULL	/images/id_3033_400_300.jpg
3296	6.10098	0.398963	5.26186	0.757559	5.41323	0.555213	47.7972	13.0255	Salzburg	NULL	NULL	/images/id_3296_400_300.jpg
3724	4.89709	0.534337	3.96181	0.669216	5.34384	0.583426	40.6876	-73.9519	New York City	46	-1	/images/id_3724_400_300.jpg
3297	4.40694	0.548463	4.71624	0.707378	3.44157	0.414635	47.7972	13.0242	Salzburg	NULL	NULL	/images/id_3297_400_300.jpg
3290	5.04263	0.489937	5.23105	0.551192	6.05218	0.515286	47.7968	13.029	Salzburg	NULL	NULL	/images/id_3290_400_300.jpg
3291	5.58372	0.493156	5.11903	0.696283	3.52515	0.403022	47.7965	13.0283	Salzburg	NULL	NULL	/images/id_3291_400_300.jpg
429	4.45102	0.51995	5.44742	0.701562	4.1375	0.510732	40.8022	-73.939	New York City	191	4	/images/id_429_400_300.jpg
428	4.19749	0.400547	5.09744	0.565444	5.89786	0.579312	40.6417	-73.9956	New York City	148	4	/images/id_428_400_300.jpg
1900	4.81092	0.453465	3.7454	0.420161	4.52861	0.627574	48.2685	14.3143	Linz	NULL	NULL	/images/id_1900_400_300.jpg
1399	5.09237	0.522116	3.91931	0.541333	4.15509	0.561231	42.3963	-71.1309	Boston	136	6	/images/id_1399_400_300.jpg
1398	2.7977	0.301473	5.20367	0.645062	4.11605	0.630185	42.362	-71.0954	Boston	163	2	/images/id_1398_400_300.jpg
1397	4.91636	0.566148	NULL	NULL	5.79054	0.429342	42.33	-71.1269	Boston	240	-5	/images/id_1397_400_300.jpg
1396	4.36618	0.529994	4.69548	0.845876	4.33701	0.431258	42.3802	-71.0309	Boston	198	10	/images/id_1396_400_300.jpg
1395	3.91985	0.518119	4.17802	0.567224	2.99253	0.288434	42.3719	-71.042	Boston	167	6	/images/id_1395_400_300.jpg
422	5.79379	0.490595	5.23427	1.32114	5.4107	0.687717	40.6174	-73.9123	New York City	185	4	/images/id_422_400_300.jpg
425	6.28261	0.471852	6.48776	0.504363	5.78603	0.463095	40.7819	-73.9795	New York City	153	7	/images/id_425_400_300.jpg
424	3.5387	0.372702	3.85381	0.614801	3.62998	0.432171	40.7501	-73.869	New York City	184	7	/images/id_424_400_300.jpg
427	4.49275	0.544072	4.6604	0.819753	5.13706	0.55308	40.7664	-73.9958	New York City	141	4	/images/id_427_400_300.jpg
426	3.49267	0.518818	3.57129	0.446718	3.38282	0.286134	40.6846	-73.8243	New York City	182	8	/images/id_426_400_300.jpg
3812	6.74606	0.538229	3.919	0.869863	5.06481	0.637617	40.7338	-73.9929	New York City	353	3	/images/id_3812_400_300.jpg
3813	3.44879	0.471397	2.97523	0.721228	2.15231	0.401567	40.5804	-73.9625	New York City	322	7	/images/id_3813_400_300.jpg
3810	4.68674	0.574663	3.48628	0.627366	5.29079	0.598161	40.6908	-73.8413	New York City	19	0	/images/id_3810_400_300.jpg
3811	5.88758	0.468795	4.68897	0.735878	6.53602	0.636995	40.6032	-73.9897	New York City	347	0	/images/id_3811_400_300.jpg
3816	4.74628	0.548911	3.12517	0.748267	3.58702	0.482687	40.6304	-73.9875	New York City	353	8	/images/id_3816_400_300.jpg
3817	1.05972	0.49567	3.8915	0.842482	1.18637	0.599992	40.6913	-73.9156	New York City	355	4	/images/id_3817_400_300.jpg
3814	4.56986	0.530927	3.8384	0.722738	3.70373	0.621946	40.6036	-73.956	New York City	280	3	/images/id_3814_400_300.jpg
3453	5.86549	0.559526	6.27789	0.564558	5.82407	0.512578	47.8022	13.0455	Salzburg	NULL	NULL	/images/id_3453_400_300.jpg
3818	7.43734	0.547989	4.09068	0.760203	6.69763	0.677341	40.7483	-73.9764	New York City	320	8	/images/id_3818_400_300.jpg
530	4.18177	0.475757	4.36827	0.521534	3.77977	0.477025	40.8474	-73.9381	New York City	183	4	/images/id_530_400_300.jpg
3450	5.43204	0.423283	4.36373	0.591496	3.61495	0.459808	47.81	13.042	Salzburg	NULL	NULL	/images/id_3450_400_300.jpg
3451	5.31469	0.471031	5.03257	0.737511	5.57064	0.572586	47.7952	13.0265	Salzburg	NULL	NULL	/images/id_3451_400_300.jpg
3627	6.46317	0.518992	4.83235	0.73046	6.01146	0.624028	40.8058	-73.943	New York City	326	4	/images/id_3627_400_300.jpg
3456	4.56397	0.466386	5.41688	0.63039	5.68859	0.564177	47.7862	13.0668	Salzburg	NULL	NULL	/images/id_3456_400_300.jpg
302	4.71575	0.494213	4.12144	0.516663	4.31371	0.533516	40.741	-73.8879	New York City	109	6	/images/id_302_400_300.jpg
3457	5.84066	0.444394	5.62376	0.762778	5.84942	0.532978	47.7867	13.0675	Salzburg	NULL	NULL	/images/id_3457_400_300.jpg
4299	1.97749	0.509736	3.24889	0.727059	2.15725	0.538717	40.5901	-73.9609	New York City	235	-1	/images/id_4299_400_300.jpg
4298	3.83861	0.571734	4.60474	0.680433	3.88812	0.572974	40.6199	-73.925	New York City	14	3	/images/id_4298_400_300.jpg
4295	4.4564	0.455988	3.99585	0.64084	3.35919	0.548469	40.5869	-73.9695	New York City	37	8	/images/id_4295_400_300.jpg
4294	5.72491	0.550995	6.1426	0.731113	4.74897	0.626594	40.685	-73.8265	New York City	24	8	/images/id_4294_400_300.jpg
4297	1.6943	0.475955	4.48768	0.705374	1.66812	0.500612	40.8192	-73.9569	New York City	340	12	/images/id_4297_400_300.jpg
4296	5.10363	0.523459	5.70444	0.727436	5.97388	0.626169	40.6394	-74.0295	New York City	334	8	/images/id_4296_400_300.jpg
4291	3.42547	0.491986	4.34506	0.643087	2.39541	0.528436	40.8554	-73.9368	New York City	333	7	/images/id_4291_400_300.jpg
4290	1.13803	0.502833	3.37065	0.847784	2.1396	0.473099	40.7129	-73.9051	New York City	40	9	/images/id_4290_400_300.jpg
4293	6.26013	0.572453	6.03265	0.753693	6.95885	0.616375	40.7519	-73.9758	New York City	345	11	/images/id_4293_400_300.jpg
4292	3.99525	0.542197	5.17415	0.720885	4.1611	0.613668	40.7449	-73.8702	New York City	19	13	/images/id_4292_400_300.jpg
3605	3.92077	0.500856	3.27399	0.538262	3.90018	0.606703	40.8081	-73.9521	New York City	332	2	/images/id_3605_400_300.jpg
4584	5.88681	0.491586	6.30906	0.765405	8.38854	0.481158	42.342	-71.1189	Boston	311	2	/images/id_4584_400_300.jpg
307	3.32614	0.335161	4.10793	0.581486	4.08662	0.475691	40.6915	-73.8277	New York City	188	6	/images/id_307_400_300.jpg
4691	4.87402	0.56027	4.39674	0.82364	4.07638	0.590607	42.3839	-71.0974	Boston	343	0	/images/id_4691_400_300.jpg
4266	2.0601	0.445374	2.522	0.765585	1.40614	0.525193	40.8483	-73.9335	New York City	344	12	/images/id_4266_400_300.jpg
258	6.63118	0.359405	5.48621	0.720514	6.40489	0.507447	40.7231	-74.0096	New York City	164	6	/images/id_258_400_300.jpg
950	4.32966	0.438301	5.80069	0.618909	3.81978	0.452757	42.3478	-71.15	Boston	186	-1	/images/id_950_400_300.jpg
4749	0.924145	0.505818	2.96017	0.783791	2.28651	0.479485	42.3858	-71.0265	Boston	24	4	/images/id_4749_400_300.jpg
4748	4.72989	0.621598	5.27283	0.758941	5.59758	0.642172	42.3844	-71.137	Boston	2	4	/images/id_4748_400_300.jpg
1425	4.42592	0.493095	4.70799	0.756546	6.05277	0.573894	42.3233	-71.0746	Boston	178	3	/images/id_1425_400_300.jpg
4743	2.80489	0.525431	3.83372	0.834008	2.95076	0.673658	42.3128	-71.1135	Boston	318	6	/images/id_4743_400_300.jpg
4742	1.21836	0.415834	2.96995	0.695712	2.16675	0.43406	42.3344	-71.056	Boston	4	3	/images/id_4742_400_300.jpg
4741	6.40571	0.588068	8.46793	0.762045	7.04572	0.740898	42.3157	-71.0339	Boston	348	8	/images/id_4741_400_300.jpg
4740	6.06477	0.63096	4.73901	0.857291	7.06491	0.601867	42.3302	-71.1192	Boston	4	2	/images/id_4740_400_300.jpg
4747	6.61386	0.471343	7.85528	0.68738	7.73046	0.644067	42.3096	-71.1108	Boston	359	7	/images/id_4747_400_300.jpg
4746	4.05239	0.51989	2.59236	0.685144	3.35696	0.656305	42.2898	-71.0482	Boston	13	6	/images/id_4746_400_300.jpg
4745	6.59128	0.557845	4.66809	0.739583	6.99056	0.648282	42.3445	-71.1487	Boston	330	5	/images/id_4745_400_300.jpg
4744	6.70783	0.511276	5.68185	0.75095	5.69997	0.551431	42.3223	-71.0828	Boston	150	5	/images/id_4744_400_300.jpg
4697	4.84767	0.513196	2.95537	0.61332	4.16955	0.576299	42.4045	-71.1054	Boston	32	1	/images/id_4697_400_300.jpg
6	4.95799	0.480484	4.9337	0.450977	5.4229	0.35667	42.3627	-71.0639	Boston	343	7	/images/id_6_400_300.jpg
2183	3.94894	0.4075	6.01624	0.766259	5.53665	0.584166	48.3095	14.275	Linz	NULL	NULL	/images/id_2183_400_300.jpg
2182	5.77978	0.42886	6.29387	0.663046	5.56973	0.677264	48.3097	14.2752	Linz	NULL	NULL	/images/id_2182_400_300.jpg
2181	5.19914	0.503329	6.10958	0.606308	4.526	0.557107	48.3097	14.2752	Linz	NULL	NULL	/images/id_2181_400_300.jpg
2180	5.66198	0.449753	6.44644	0.555897	5.96519	0.603959	48.3097	14.2782	Linz	NULL	NULL	/images/id_2180_400_300.jpg
2187	5.78104	0.518362	5.28351	0.656074	5.16338	0.576893	48.3092	14.2768	Linz	NULL	NULL	/images/id_2187_400_300.jpg
2186	4.98053	0.415872	5.70294	0.807292	5.57137	0.573865	48.3092	14.2768	Linz	NULL	NULL	/images/id_2186_400_300.jpg
2185	6.2728	0.390452	6.70376	0.565707	5.44855	0.515985	48.3092	14.2768	Linz	NULL	NULL	/images/id_2185_400_300.jpg
228	3.70607	0.353549	5.03127	0.728249	4.46592	0.40739	40.7302	-73.933	New York City	117	-1	/images/id_228_400_300.jpg
4606	6.13364	0.460965	6.24881	0.729104	6.04	0.528345	42.36	-71.0664	Boston	317	1	/images/id_4606_400_300.jpg
226	4.72161	0.504041	3.5572	0.407472	3.34719	0.395815	40.6546	-73.9419	New York City	231	1	/images/id_226_400_300.jpg
225	5.55928	0.395389	5.23696	0.719196	4.90145	0.633135	40.6669	-73.8259	New York City	341	3	/images/id_225_400_300.jpg
224	3.88182	0.472225	5.12734	0.5581	5.08817	0.581222	40.7345	-74.0101	New York City	191	8	/images/id_224_400_300.jpg
4602	7.51176	0.474285	6.70487	0.636639	6.73193	0.59589	42.3192	-71.1052	Boston	357	1	/images/id_4602_400_300.jpg
4603	5.71232	0.510529	4.22901	0.622102	5.48518	0.60901	42.3314	-71.0398	Boston	317	6	/images/id_4603_400_300.jpg
4600	6.8081	0.558556	6.17153	0.714239	7.49218	0.483424	42.3103	-71.0702	Boston	345	1	/images/id_4600_400_300.jpg
220	4.06087	0.428521	5.14157	0.737456	3.06576	0.288309	40.704	-73.9406	New York City	230	5	/images/id_220_400_300.jpg
2213	4.33369	0.464806	5.85566	0.66575	4.22709	0.501502	48.3002	14.2937	Linz	NULL	NULL	/images/id_2213_400_300.jpg
2212	6.64325	0.481166	5.72723	0.672497	5.09331	0.589185	48.3002	14.2937	Linz	NULL	NULL	/images/id_2212_400_300.jpg
2211	5.54181	0.471004	6.19457	0.640514	4.30423	0.551159	48.3002	14.2937	Linz	NULL	NULL	/images/id_2211_400_300.jpg
2210	6.26824	0.48084	6.27417	0.631018	5.97833	0.657319	48.3015	14.2922	Linz	NULL	NULL	/images/id_2210_400_300.jpg
2217	5.15472	0.470377	5.60288	0.756133	5.50901	0.606988	48.2988	14.2948	Linz	NULL	NULL	/images/id_2217_400_300.jpg
2216	4.95039	0.591193	4.62695	0.731682	6.10404	0.549763	48.2988	14.2948	Linz	NULL	NULL	/images/id_2216_400_300.jpg
2215	5.0782	0.500428	5.0118	0.779997	5.05837	0.543597	48.2988	14.2948	Linz	NULL	NULL	/images/id_2215_400_300.jpg
2214	5.14108	0.418187	5.35349	0.793913	5.73173	0.457359	48.2993	14.2942	Linz	NULL	NULL	/images/id_2214_400_300.jpg
2219	5.15917	0.571479	6.37761	0.711002	4.88317	0.62373	48.296	14.295	Linz	NULL	NULL	/images/id_2219_400_300.jpg
2218	4.34336	0.504171	6.58795	0.57132	4.73859	0.579066	48.296	14.2953	Linz	NULL	NULL	/images/id_2218_400_300.jpg
1089	5.78159	0.528095	4.78308	0.78588	4.4464	0.585701	42.3127	-71.0547	Boston	230	1	/images/id_1089_400_300.jpg
3375	4.20366	0.416376	4.29911	0.626701	3.94521	0.404763	47.8223	13.016	Salzburg	NULL	NULL	/images/id_3375_400_300.jpg
151	3.82276	0.327046	3.58823	0.493417	3.47605	0.424136	40.8252	-73.9535	New York City	280	0	/images/id_151_400_300.jpg
150	3.64887	0.36345	3.70137	0.57095	3.93961	0.443832	40.725	-73.8701	New York City	72	1	/images/id_150_400_300.jpg
153	5.40944	0.56584	5.57345	0.639844	5.04152	0.627097	40.6373	-73.9772	New York City	201	6	/images/id_153_400_300.jpg
152	5.50841	0.481855	4.33046	0.591822	5.48606	0.544053	40.7787	-73.9879	New York City	281	5	/images/id_152_400_300.jpg
122	4.40344	0.468595	4.83553	0.755665	4.1332	0.503297	40.7807	-73.9865	New York City	317	2	/images/id_122_400_300.jpg
154	6.42143	0.416928	6.26459	0.581004	5.73164	0.684289	40.752	-73.9714	New York City	157	9	/images/id_154_400_300.jpg
156	3.90334	0.342578	7.00297	0.150814	3.88903	0.561259	40.7294	-73.9451	New York City	204	-3	/images/id_156_400_300.jpg
159	4.96034	0.527754	5.17445	0.604717	6.25748	0.575366	40.7516	-73.9724	New York City	273	12	/images/id_159_400_300.jpg
158	3.31669	0.350541	3.67581	0.421798	3.64754	0.478889	40.733	-73.9428	New York City	135	2	/images/id_158_400_300.jpg
1293	5.75871	0.457456	5.44239	0.691389	6.3463	0.47202	42.3569	-71.0556	Boston	179	2	/images/id_1293_400_300.jpg
1088	3.93834	0.413663	4.0243	0.595351	3.32714	0.41388	42.3925	-71.0931	Boston	89	-1	/images/id_1088_400_300.jpg
3761	7.0851	0.547063	5.51837	0.752242	5.28588	0.615762	40.8065	-73.9266	New York City	331	0	/images/id_3761_400_300.jpg
4518	5.1127	0.526686	4.6146	0.930359	2.76789	0.665633	42.3322	-71.0482	Boston	35	2	/images/id_4518_400_300.jpg
4519	1.76172	0.428596	2.98564	0.580078	1.42017	0.456742	42.3421	-71.0508	Boston	349	0	/images/id_4519_400_300.jpg
4512	5.40756	0.628462	5.68756	0.793299	5.49905	0.584196	42.341	-71.1214	Boston	321	-3	/images/id_4512_400_300.jpg
4513	7.47143	0.542844	6.2995	0.812036	8.20186	0.564252	42.3772	-71.1401	Boston	307	2	/images/id_4513_400_300.jpg
4510	3.87249	0.479207	3.56434	0.510382	3.27415	0.588118	42.4015	-71.0359	Boston	355	6	/images/id_4510_400_300.jpg
4511	7.70798	0.427054	6.89393	0.734719	7.96664	0.636827	42.3456	-71.1081	Boston	110	7	/images/id_4511_400_300.jpg
4516	5.0782	0.522002	2.88106	0.687773	4.54773	0.514416	42.2963	-71.0609	Boston	41	1	/images/id_4516_400_300.jpg
4517	7.21586	0.556971	4.76722	0.748465	6.88467	0.613949	42.2946	-71.0637	Boston	45	1	/images/id_4517_400_300.jpg
4514	4.83058	0.54735	3.64828	0.821827	5.62738	0.552578	42.3638	-71.0868	Boston	275	9	/images/id_4514_400_300.jpg
4515	7.99034	0.546677	5.9317	0.833559	7.97329	0.53152	42.3582	-71.0904	Boston	32	4	/images/id_4515_400_300.jpg
1162	4.02993	0.387219	5.84396	0.727246	3.70838	0.580736	42.3028	-71.064	Boston	319	2	/images/id_1162_400_300.jpg
4553	6.1185	0.562075	5.24398	0.696046	6.3001	0.546176	42.4038	-71.1254	Boston	340	1	/images/id_4553_400_300.jpg
1163	4.49916	0.46858	4.17796	0.642956	5.0916	0.551584	42.379	-71.1491	Boston	115	2	/images/id_1163_400_300.jpg
3782	5.6716	0.597582	3.23302	0.667057	4.35737	0.639993	40.8562	-73.9353	New York City	53	-1	/images/id_3782_400_300.jpg
1806	4.72775	0.439092	5.4366	0.808722	5.46649	0.634187	48.2687	14.2893	Linz	NULL	NULL	/images/id_1806_400_300.jpg
3780	5.84184	0.544197	4.6995	0.781722	3.56473	0.5102	40.5929	-73.9748	New York City	329	4	/images/id_3780_400_300.jpg
3781	7.21849	0.443111	5.5315	0.781164	7.63159	0.67587	40.7189	-73.8709	New York City	8	0	/images/id_3781_400_300.jpg
1803	4.89395	0.500047	4.14398	0.456717	4.0833	0.38318	48.2672	14.29	Linz	NULL	NULL	/images/id_1803_400_300.jpg
3787	5.66401	0.576304	4.83434	0.721572	5.96309	0.57752	40.6989	-73.8466	New York City	102	10	/images/id_3787_400_300.jpg
1801	4.67953	0.440148	4.41452	0.582694	3.95952	0.527919	48.2562	14.2882	Linz	NULL	NULL	/images/id_1801_400_300.jpg
1800	5.79637	0.38841	5.94404	0.619772	5.62858	0.555274	48.2562	14.2882	Linz	NULL	NULL	/images/id_1800_400_300.jpg
3788	5.43155	0.558152	4.41214	0.770047	4.85435	0.605906	40.8145	-73.9516	New York City	331	6	/images/id_3788_400_300.jpg
3789	6.74946	0.570229	5.50455	0.738565	8.24043	0.613717	40.7045	-73.8608	New York City	30	1	/images/id_3789_400_300.jpg
1809	5.69544	0.468124	5.14374	0.802326	5.66143	0.508984	48.2687	14.2913	Linz	NULL	NULL	/images/id_1809_400_300.jpg
1808	4.55452	0.472884	3.94392	0.690606	5.00219	0.466971	48.2687	14.2913	Linz	NULL	NULL	/images/id_1808_400_300.jpg
3089	5.8868	0.507098	5.5387	0.624965	5.64091	0.634024	47.7985	13.0543	Salzburg	NULL	NULL	/images/id_3089_400_300.jpg
2160	7.12784	0.3402	5.64198	0.642014	5.68454	0.504747	48.3137	14.2853	Linz	NULL	NULL	/images/id_2160_400_300.jpg
3716	4.91305	0.634922	3.48762	0.789996	3.39725	0.520774	40.7384	-73.8725	New York City	42	0	/images/id_3716_400_300.jpg
3710	7.06317	0.536893	5.0613	0.785737	7.12717	0.638771	40.8094	-73.9628	New York City	56	8	/images/id_3710_400_300.jpg
3259	5.04466	0.451947	6.22632	0.601756	5.33733	0.500833	47.811	13.0332	Salzburg	NULL	NULL	/images/id_3259_400_300.jpg
1948	4.70882	0.431725	5.39653	0.712338	4.02772	0.677051	48.2915	14.3168	Linz	NULL	NULL	/images/id_1948_400_300.jpg
1949	4.70245	0.603862	4.46277	0.674616	4.5779	0.505111	48.2915	14.3168	Linz	NULL	NULL	/images/id_1949_400_300.jpg
1257	5.27807	0.462323	4.83041	0.720056	5.12021	0.423703	42.3373	-71.038	Boston	299	2	/images/id_1257_400_300.jpg
1942	4.28284	0.431269	4.17576	0.679216	3.92907	0.480927	48.2907	14.3055	Linz	NULL	NULL	/images/id_1942_400_300.jpg
3251	5.10928	0.457133	6.50312	0.6505	5.29328	0.621495	47.8118	13.0295	Salzburg	NULL	NULL	/images/id_3251_400_300.jpg
1940	4.53656	0.420475	4.03018	0.462281	5.05275	0.480998	48.2877	14.3048	Linz	NULL	NULL	/images/id_1940_400_300.jpg
1941	6.32088	0.411808	3.92675	0.459946	6.08552	0.558242	48.2892	14.306	Linz	NULL	NULL	/images/id_1941_400_300.jpg
1946	5.09785	0.531569	4.64325	0.634714	5.35986	0.527951	48.2903	14.3107	Linz	NULL	NULL	/images/id_1946_400_300.jpg
3255	5.92922	0.325967	4.97621	0.716183	6.18882	0.442857	47.8117	13.0297	Salzburg	NULL	NULL	/images/id_3255_400_300.jpg
3256	5.73548	0.438785	5.56945	0.665833	5.28884	0.515884	47.8115	13.0298	Salzburg	NULL	NULL	/images/id_3256_400_300.jpg
1945	4.02597	0.464697	5.97019	0.612293	4.10779	0.542941	48.2903	14.3107	Linz	NULL	NULL	/images/id_1945_400_300.jpg
818	5.08487	0.474107	4.79935	0.70953	4.97899	0.55953	40.629	-73.9803	New York City	190	3	/images/id_818_400_300.jpg
819	2.44076	0.242561	3.47369	0.39641	2.79906	0.223665	40.7263	-73.936	New York City	139	-1	/images/id_819_400_300.jpg
810	5.45841	0.463707	3.15444	0.2008	4.33788	0.6304	40.6599	-73.8362	New York City	154	3	/images/id_810_400_300.jpg
811	5.61056	0.424703	5.7494	0.723265	5.46376	0.40468	40.6259	-73.9596	New York City	200	5	/images/id_811_400_300.jpg
812	5.03919	0.482813	4.13329	0.685361	3.43283	0.343707	40.7193	-73.8896	New York City	219	4	/images/id_812_400_300.jpg
813	4.56717	0.549175	5.60632	0.663571	3.68907	0.364486	40.6827	-73.9998	New York City	141	-1	/images/id_813_400_300.jpg
814	4.77031	0.508915	4.00194	0.533416	4.5765	0.551865	40.6257	-73.9237	New York City	216	-5	/images/id_814_400_300.jpg
815	4.30929	0.473879	NULL	NULL	2.67456	0.378047	40.6813	-73.8818	New York City	232	-2	/images/id_815_400_300.jpg
816	6.80423	0.410779	5.7596	0.627667	6.85233	0.446947	40.7468	-73.9204	New York City	129	0	/images/id_816_400_300.jpg
817	3.40043	0.366188	2.97966	0.231851	3.2961	0.395244	40.814	-73.9303	New York City	174	3	/images/id_817_400_300.jpg
1991	4.25331	0.472454	4.39376	0.458099	4.06792	0.54237	48.3023	14.3093	Linz	NULL	NULL	/images/id_1991_400_300.jpg
3495	5.53027	0.598075	6.16863	0.883743	5.72231	0.512977	40.833	-73.9463	New York City	332	3	/images/id_3495_400_300.jpg
1250	4.66965	0.453717	4.97556	0.837917	6.25143	0.57951	42.3964	-71.1011	Boston	265	0	/images/id_1250_400_300.jpg
1622	4.70197	0.519901	6.64544	0.619904	5.05486	0.560814	48.3023	14.283	Linz	NULL	NULL	/images/id_1622_400_300.jpg
1251	5.21787	0.410568	5.25216	0.72646	5.71011	0.561703	42.3533	-71.0572	Boston	136	11	/images/id_1251_400_300.jpg
1621	4.52236	0.474855	6.24807	0.844085	4.83391	0.527315	48.3042	14.2815	Linz	NULL	NULL	/images/id_1621_400_300.jpg
3333	4.76	0.565901	5.06789	0.882517	4.07467	0.403301	47.8025	13.0267	Salzburg	NULL	NULL	/images/id_3333_400_300.jpg
421	5.37481	0.518832	5.01218	0.675141	6.2031	0.367433	40.6723	-74.0049	New York City	143	0	/images/id_421_400_300.jpg
3331	3.85987	0.373765	4.29018	0.68799	3.79551	0.504151	47.8032	13.029	Salzburg	NULL	NULL	/images/id_3331_400_300.jpg
1493	5.09383	0.461865	3.6189	0.5152	5.38184	0.520574	42.3514	-71.144	Boston	276	3	/images/id_1493_400_300.jpg
3337	5.25874	0.458836	5.4845	0.857346	4.74516	0.582539	47.7972	13.0305	Salzburg	NULL	NULL	/images/id_3337_400_300.jpg
1495	6.21246	0.517016	5.25115	0.689525	5.93576	0.51159	42.3492	-71.1155	Boston	124	5	/images/id_1495_400_300.jpg
1496	6.52503	0.395666	6.26455	0.594896	6.97111	0.119178	42.3438	-71.0704	Boston	99	-4	/images/id_1496_400_300.jpg
1497	5.37878	0.580632	6.37133	0.533078	6.37411	0.573919	42.3338	-71.1308	Boston	6	-4	/images/id_1497_400_300.jpg
1498	5.49446	0.445237	5.76503	0.767357	6.10732	0.461679	42.3176	-71.0744	Boston	160	0	/images/id_1498_400_300.jpg
3203	4.49987	0.391275	5.52228	0.545783	3.91235	0.424226	47.8122	13.0635	Salzburg	NULL	NULL	/images/id_3203_400_300.jpg
3339	3.95938	0.371473	4.27506	0.840426	5.84172	0.526358	47.796	13.0302	Salzburg	NULL	NULL	/images/id_3339_400_300.jpg
3338	5.46537	0.435524	5.7078	0.619751	6.38237	0.548327	47.797	13.0303	Salzburg	NULL	NULL	/images/id_3338_400_300.jpg
423	5.82113	0.521104	4.59175	0.55609	4.95062	0.539012	40.6709	-73.9777	New York City	273	2	/images/id_423_400_300.jpg
3202	3.96723	0.376063	3.98502	0.65545	3.77889	0.413516	47.8122	13.0632	Salzburg	NULL	NULL	/images/id_3202_400_300.jpg
1700	5.20651	0.518365	4.30091	0.500368	5.01153	0.58537	48.2875	14.2952	Linz	NULL	NULL	/images/id_1700_400_300.jpg
1701	4.69339	0.478745	4.66033	0.761506	4.13866	0.661556	48.2875	14.295	Linz	NULL	NULL	/images/id_1701_400_300.jpg
1702	4.72097	0.600413	4.81978	0.744841	4.36029	0.626051	48.2838	14.2917	Linz	NULL	NULL	/images/id_1702_400_300.jpg
1394	4.23312	0.522805	3.82108	0.577781	4.48117	0.530871	42.372	-71.0922	Boston	160	8	/images/id_1394_400_300.jpg
1704	4.17821	0.557872	3.39612	0.608415	2.73701	0.249329	48.2835	14.29	Linz	NULL	NULL	/images/id_1704_400_300.jpg
1705	5.37486	0.501724	2.89669	0.471451	4.45141	0.541132	48.2813	14.2835	Linz	NULL	NULL	/images/id_1705_400_300.jpg
1706	4.65479	0.549367	5.42035	0.821114	4.17858	0.511248	48.2813	14.2835	Linz	NULL	NULL	/images/id_1706_400_300.jpg
1707	5.435	0.493465	4.20031	0.669183	5.23214	0.56547	48.279	14.2802	Linz	NULL	NULL	/images/id_1707_400_300.jpg
1708	3.13257	0.372624	2.95729	0.453207	4.03911	0.525612	48.277	14.2767	Linz	NULL	NULL	/images/id_1708_400_300.jpg
1393	5.71216	0.480066	6.07391	0.453478	6.44673	0.502644	42.3292	-71.1169	Boston	163	6	/images/id_1393_400_300.jpg
1168	6.09603	0.352046	5.59896	0.879399	6.05487	0.438658	42.3064	-71.0853	Boston	141	1	/images/id_1168_400_300.jpg
3200	4.44132	0.367516	5.70559	0.652553	4.47506	0.592617	47.8122	13.061	Salzburg	NULL	NULL	/images/id_3200_400_300.jpg
2097	6.45487	0.434651	6.69992	0.562559	5.72886	0.559301	48.3177	14.2792	Linz	NULL	NULL	/images/id_2097_400_300.jpg
1392	5.21021	0.497202	5.18883	1.10413	5.69837	0.615447	42.3686	-71.097	Boston	154	2	/images/id_1392_400_300.jpg
2096	5.93546	0.505802	6.43712	0.578453	7.36454	0.239132	48.3172	14.2797	Linz	NULL	NULL	/images/id_2096_400_300.jpg
1391	6.02518	0.479166	5.29383	0.652985	6.3435	0.493506	42.3373	-71.1438	Boston	230	-3	/images/id_1391_400_300.jpg
4574	7.27331	0.508781	5.99323	0.75512	7.53821	0.554635	42.2898	-71.0496	Boston	291	3	/images/id_4574_400_300.jpg
1390	3.24115	0.346628	4.20521	0.798183	4.94939	0.544262	42.3536	-71.0473	Boston	137	2	/images/id_1390_400_300.jpg
2090	5.28184	0.509707	4.06255	0.620154	6.34351	0.460299	48.3177	14.2835	Linz	NULL	NULL	/images/id_2090_400_300.jpg
1128	4.38959	0.49089	3.38743	0.42751	4.85669	0.572297	42.3735	-71.0884	Boston	130	7	/images/id_1128_400_300.jpg
1129	6.38745	0.360641	6.53526	0.550288	6.15113	0.523327	42.3983	-71.1198	Boston	161	4	/images/id_1129_400_300.jpg
2093	5.48337	0.399838	4.98728	0.861339	5.24	0.590195	48.3165	14.2822	Linz	NULL	NULL	/images/id_2093_400_300.jpg
1120	5.62781	0.587226	5.3485	0.530947	5.14597	0.540426	42.304	-71.0546	Boston	157	2	/images/id_1120_400_300.jpg
1121	4.63711	0.553633	5.38901	0.706939	4.75845	0.476845	42.3756	-71.1305	Boston	219	1	/images/id_1121_400_300.jpg
1122	3.30778	0.448768	4.43265	0.646289	3.16085	0.307673	42.305	-71.0567	Boston	168	2	/images/id_1122_400_300.jpg
1123	5.2393	0.431873	5.83771	0.655324	5.74742	0.593992	42.3331	-71.0338	Boston	230	2	/images/id_1123_400_300.jpg
1124	5.91883	0.418835	4.05407	0.608217	6.20498	0.498932	42.2895	-71.0779	Boston	228	4	/images/id_1124_400_300.jpg
1125	5.24733	0.476967	5.72049	0.645497	5.02423	0.544324	42.3803	-71.1035	Boston	304	2	/images/id_1125_400_300.jpg
1126	4.0979	0.478343	4.08477	0.689415	4.6352	0.58246	42.3979	-71.0858	Boston	208	1	/images/id_1126_400_300.jpg
1127	3.61629	0.396075	3.68616	0.442767	3.81427	0.461771	42.3768	-71.093	Boston	99	1	/images/id_1127_400_300.jpg
4578	5.84712	0.593791	3.9827	0.619559	5.87685	0.61526	42.3172	-71.0756	Boston	54	3	/images/id_4578_400_300.jpg
262	6.49612	0.370825	5.88943	0.546927	6.48406	0.404807	40.7426	-73.9997	New York City	148	2	/images/id_262_400_300.jpg
4579	5.69532	0.596235	3.92844	0.843432	5.82163	0.607616	42.3666	-71.0988	Boston	331	4	/images/id_4579_400_300.jpg
313	6.39964	0.478343	5.13726	0.715423	6.63457	0.484306	40.6984	-73.8419	New York City	190	0	/images/id_313_400_300.jpg
305	5.76912	0.642165	4.26354	0.649504	6.622	0.374505	40.6645	-73.9544	New York City	117	2	/images/id_305_400_300.jpg
2989	5.58211	0.509375	5.98509	0.746359	5.21175	0.545456	47.8055	13.0278	Salzburg	NULL	NULL	/images/id_2989_400_300.jpg
2988	3.88536	0.474752	5.43413	0.611984	5.01037	0.655425	47.805	13.028	Salzburg	NULL	NULL	/images/id_2988_400_300.jpg
3029	4.34781	0.43931	5.64549	0.653151	4.05322	0.571645	47.7867	13.0517	Salzburg	NULL	NULL	/images/id_3029_400_300.jpg
3028	5.79772	0.439578	5.41347	0.73888	6.29948	0.483148	47.8012	13.0393	Salzburg	NULL	NULL	/images/id_3028_400_300.jpg
3027	5.36954	0.476037	4.82849	0.767607	5.22589	0.516988	47.7992	13.055	Salzburg	NULL	NULL	/images/id_3027_400_300.jpg
2099	5.41487	0.438805	5.27484	0.778956	5.53731	0.554287	48.3195	14.2763	Linz	NULL	NULL	/images/id_2099_400_300.jpg
2981	5.76232	0.475383	5.86362	0.826228	5.93433	0.413924	47.8032	13.0392	Salzburg	NULL	NULL	/images/id_2981_400_300.jpg
3024	6.18477	0.391948	5.22487	0.809761	5.97571	0.506393	47.7935	13.0277	Salzburg	NULL	NULL	/images/id_3024_400_300.jpg
2987	5.82674	0.420775	6.02306	0.532308	5.08928	0.573565	47.8032	13.0292	Salzburg	NULL	NULL	/images/id_2987_400_300.jpg
3022	5.2113	0.361625	5.18941	0.737543	6.01789	0.572314	47.7923	13.0267	Salzburg	NULL	NULL	/images/id_3022_400_300.jpg
2985	5.25119	0.444849	6.30566	0.576038	5.12234	0.560098	47.8028	13.0305	Salzburg	NULL	NULL	/images/id_2985_400_300.jpg
3651	5.98914	0.521936	5.60662	0.631398	6.19522	0.643118	40.7665	-73.9162	New York City	359	7	/images/id_3651_400_300.jpg
524	2.91079	0.250823	3.22156	0.152788	2.70088	0.429495	40.712	-73.9173	New York City	225	-3	/images/id_524_400_300.jpg
525	3.2979	0.301502	3.55428	0.62628	3.88937	0.610014	40.7394	-73.8914	New York City	167	9	/images/id_525_400_300.jpg
526	4.90247	0.447887	5.27169	0.7308	4.5531	0.600241	40.751	-73.8526	New York City	222	10	/images/id_526_400_300.jpg
527	5.36707	0.474155	5.48943	0.554333	6.00385	0.469198	40.7347	-73.9988	New York City	176	3	/images/id_527_400_300.jpg
1018	5.04079	0.573398	5.49644	0.760701	5.78607	0.457027	42.3516	-71.134	Boston	189	0	/images/id_1018_400_300.jpg
1019	6.09135	0.456537	4.90147	0.602171	5.23643	0.616962	42.3341	-71.0283	Boston	115	7	/images/id_1019_400_300.jpg
522	4.25819	0.484917	4.6065	0.672292	4.20112	0.590406	40.652	-73.9401	New York City	195	8	/images/id_522_400_300.jpg
523	3.98049	0.333253	4.66864	0.720653	2.91525	0.288294	40.6599	-73.9293	New York City	187	6	/images/id_523_400_300.jpg
1014	3.53133	0.28967	3.24772	0.116063	4.16874	0.532709	42.3664	-71.1069	Boston	155	7	/images/id_1014_400_300.jpg
1015	3.93206	0.522299	4.0859	0.770408	3.97813	0.477447	42.3853	-71.0819	Boston	154	4	/images/id_1015_400_300.jpg
1016	4.31785	0.369431	4.52627	0.463095	4.39714	0.587155	42.35	-71.132	Boston	244	2	/images/id_1016_400_300.jpg
1017	5.1129	0.58015	4.77681	0.595624	4.42562	0.637478	42.3643	-71.1047	Boston	157	11	/images/id_1017_400_300.jpg
1010	4.77776	0.359234	4.95132	0.625642	4.73038	0.524561	42.3783	-71.0911	Boston	200	2	/images/id_1010_400_300.jpg
1011	3.96576	0.41611	4.78579	0.766743	4.45942	0.635658	42.3209	-71.0973	Boston	219	0	/images/id_1011_400_300.jpg
1012	3.12397	0.298403	3.95908	0.770657	3.15926	0.29316	42.3909	-71.0409	Boston	254	6	/images/id_1012_400_300.jpg
1013	6.07782	0.434597	6.0408	0.544684	5.70719	0.478746	42.3262	-71.0778	Boston	195	3	/images/id_1013_400_300.jpg
1234	5.0981	0.442973	5.35941	0.598592	6.75566	0.326629	42.3869	-71.1077	Boston	144	3	/images/id_1234_400_300.jpg
1235	4.40081	0.43647	4.29429	0.585243	3.38866	0.472234	42.3382	-71.0509	Boston	174	1	/images/id_1235_400_300.jpg
1236	5.18452	0.482309	5.52452	0.68894	6.21667	0.600679	42.2872	-71.0677	Boston	206	0	/images/id_1236_400_300.jpg
1237	5.71769	0.710168	5.26392	0.75412	5.81133	0.436276	42.3907	-71.1297	Boston	147	2	/images/id_1237_400_300.jpg
1230	6.86511	0.343849	5.95271	0.60296	7.11126	0.391039	42.3743	-71.1032	Boston	187	-5	/images/id_1230_400_300.jpg
1231	4.26621	0.445521	3.96306	0.563131	4.90424	0.54267	42.3947	-71.1105	Boston	170	0	/images/id_1231_400_300.jpg
1232	5.71866	0.446027	5.92856	0.700512	6.38545	0.46247	42.3527	-71.1484	Boston	86	1	/images/id_1232_400_300.jpg
1233	5.77239	0.525558	4.43064	0.667082	6.10713	0.487377	42.2938	-71.07	Boston	116	0	/images/id_1233_400_300.jpg
4196	8.32777	0.556107	5.02274	0.833578	7.49817	0.656081	40.678	-73.9703	New York City	329	1	/images/id_4196_400_300.jpg
4197	1.49767	0.440238	3.26171	0.660312	1.5522	0.485691	40.6506	-74.018	New York City	351	4	/images/id_4197_400_300.jpg
4194	6.43525	0.556732	5.61255	0.707915	6.46201	0.627954	40.7148	-73.8554	New York City	342	3	/images/id_4194_400_300.jpg
4195	1.92383	0.370559	1.65135	0.700636	2.14063	0.466083	40.7289	-73.9471	New York City	21	2	/images/id_4195_400_300.jpg
1238	6.00416	0.452404	6.54553	0.485553	5.58133	0.392795	42.3359	-71.05	Boston	91	-2	/images/id_1238_400_300.jpg
1239	5.47432	0.554778	3.01945	0.180133	4.5619	0.558691	42.3981	-71.1068	Boston	263	-1	/images/id_1239_400_300.jpg
4190	5.33502	0.529635	3.58707	0.694418	4.25696	0.627265	40.6095	-73.9752	New York City	37	16	/images/id_4190_400_300.jpg
4191	4.93968	0.474892	3.35989	0.631528	4.7113	0.618839	40.701	-73.8806	New York City	26	12	/images/id_4191_400_300.jpg
4358	8.19819	0.481282	7.03484	0.754887	8.73972	0.48687	42.3502	-71.0804	Boston	36	0	/images/id_4358_400_300.jpg
3955	1.05049	0.386585	3.29601	0.525114	1.11398	0.465127	40.6801	-74.017	New York City	325	8	/images/id_3955_400_300.jpg
4354	3.06105	0.519578	2.46278	0.72965	2.45411	0.492407	42.3168	-71.1127	Boston	339	2	/images/id_4354_400_300.jpg
4355	3.74056	0.481713	4.7891	0.656218	5.17461	0.710146	42.3368	-71.0449	Boston	339	4	/images/id_4355_400_300.jpg
4356	4.51265	0.554322	4.68599	0.758834	4.82524	0.599654	42.3819	-71.0666	Boston	348	0	/images/id_4356_400_300.jpg
4357	5.29011	0.50948	5.31071	0.78608	5.36055	0.648231	42.3445	-71.0677	Boston	330	2	/images/id_4357_400_300.jpg
4350	4.15623	0.474918	4.46291	0.688628	4.97122	0.694898	42.3977	-71.0285	Boston	271	6	/images/id_4350_400_300.jpg
4351	3.33893	0.51829	3.66999	0.617822	3.80994	0.50139	42.3144	-71.0729	Boston	67	5	/images/id_4351_400_300.jpg
4352	1.71476	0.417392	3.08785	0.640806	1.3044	0.479188	42.3417	-71.0474	Boston	78	4	/images/id_4352_400_300.jpg
4353	7.21054	0.543361	6.07975	0.803335	7.07388	0.59174	42.3462	-71.0739	Boston	287	5	/images/id_4353_400_300.jpg
1092	5.28669	0.488787	4.48839	0.637292	6.58829	0.458527	42.3913	-71.1104	Boston	156	2	/images/id_1092_400_300.jpg
4677	4.49494	0.536727	3.53883	0.636042	2.99096	0.613194	42.3015	-71.1085	Boston	68	2	/images/id_4677_400_300.jpg
438	4.64679	0.534963	5.40625	0.74649	4.7285	0.539831	40.6463	-74.0063	New York City	154	2	/images/id_438_400_300.jpg
439	6.34642	0.396247	5.82849	0.71714	5.74169	0.556657	40.7634	-73.9132	New York City	190	6	/images/id_439_400_300.jpg
436	3.88104	0.381861	3.71355	0.435056	3.69283	0.381895	40.6651	-73.854	New York City	189	0	/images/id_436_400_300.jpg
437	5.89079	0.416228	5.98487	0.654937	5.43716	0.55685	40.8023	-73.9661	New York City	142	5	/images/id_437_400_300.jpg
434	5.61034	0.429618	4.58564	0.503521	5.33568	0.553549	40.7126	-73.9495	New York City	224	2	/images/id_434_400_300.jpg
435	4.76449	0.492532	3.85117	0.551586	4.63179	0.654329	40.6502	-73.8422	New York City	238	0	/images/id_435_400_300.jpg
432	3.14885	0.439325	3.09995	0.546011	2.95574	0.265508	40.7251	-73.9566	New York City	5	2	/images/id_432_400_300.jpg
433	5.29431	0.459814	4.35706	0.730018	4.58496	0.486178	40.6592	-73.9837	New York City	158	8	/images/id_433_400_300.jpg
430	4.0217	0.419266	4.83911	0.680432	3.69561	0.528104	40.6275	-74.0117	New York City	162	9	/images/id_430_400_300.jpg
431	5.02709	0.692406	5.90506	0.577496	4.26044	0.540948	40.7627	-73.9852	New York City	146	-1	/images/id_431_400_300.jpg
4902	6.72278	0.449867	5.09458	0.786952	5.51477	0.638688	42.3297	-71.1279	Boston	323	5	/images/id_4902_400_300.jpg
3809	6.30608	0.507332	4.79369	0.658431	5.02865	0.627549	40.6439	-73.9382	New York City	24	9	/images/id_3809_400_300.jpg
3808	1.95292	0.493717	3.24732	0.65489	2.52729	0.477593	40.6279	-73.9321	New York City	47	5	/images/id_3808_400_300.jpg
3805	4.67971	0.533102	3.62288	0.85412	4.43453	0.547562	40.8237	-73.9552	New York City	199	13	/images/id_3805_400_300.jpg
3804	5.94468	0.558593	6.58926	0.673887	4.60765	0.703017	40.7264	-73.9862	New York City	1	13	/images/id_3804_400_300.jpg
3807	2.99165	0.509156	3.25553	0.66002	1.24007	0.548394	40.6862	-73.9576	New York City	46	0	/images/id_3807_400_300.jpg
3806	3.78043	0.516211	6.36919	0.756513	4.30365	0.571142	40.6709	-73.88	New York City	323	4	/images/id_3806_400_300.jpg
3801	6.99645	0.616568	6.27639	0.677773	6.55512	0.501651	40.5791	-73.9466	New York City	137	-1	/images/id_3801_400_300.jpg
3800	2.97303	0.411653	2.7722	0.795709	1.57497	0.554252	40.6756	-73.8977	New York City	296	2	/images/id_3800_400_300.jpg
3803	6.45784	0.567139	7.96367	0.75534	6.84154	0.588059	40.7566	-73.9882	New York City	327	9	/images/id_3803_400_300.jpg
3802	3.37457	0.52818	3.78401	0.942661	1.94894	0.61434	40.5983	-73.9553	New York City	332	1	/images/id_3802_400_300.jpg
4671	5.04561	0.634612	4.69905	0.698168	3.4081	0.634216	42.4046	-71.1046	Boston	48	-3	/images/id_4671_400_300.jpg
473	3.71099	0.435301	3.56114	0.612375	4.18151	0.507762	40.6998	-73.9822	New York City	305	12	/images/id_473_400_300.jpg
4906	6.74839	0.546287	6.71844	0.729674	5.8185	0.536848	42.38	-71.0619	Boston	55	-2	/images/id_4906_400_300.jpg
2162	6.08546	0.443135	5.73135	0.654983	5.61348	0.571936	48.3153	14.2773	Linz	NULL	NULL	/images/id_2162_400_300.jpg
1967	5.12676	0.498466	5.83517	0.771672	5.0387	0.529848	48.2978	14.314	Linz	NULL	NULL	/images/id_1967_400_300.jpg
4776	4.36505	0.517752	3.98103	0.882311	4.81144	0.661723	42.3314	-71.0418	Boston	306	2	/images/id_4776_400_300.jpg
4777	4.85501	0.546185	4.40833	0.805446	3.337	0.56736	42.3112	-71.0868	Boston	335	7	/images/id_4777_400_300.jpg
4774	3.00522	0.476776	2.53419	0.762868	2.10796	0.40926	42.3309	-71.0685	Boston	3	2	/images/id_4774_400_300.jpg
4775	1.23184	0.417226	1.61032	0.655013	0.78717	0.55305	42.3542	-71.107	Boston	23	5	/images/id_4775_400_300.jpg
4772	3.26851	0.495379	3.4135	0.75615	3.93616	0.700604	42.404	-71.1397	Boston	25	6	/images/id_4772_400_300.jpg
4773	5.15865	0.64287	3.63982	0.623005	4.89095	0.634675	42.4051	-71.1286	Boston	137	0	/images/id_4773_400_300.jpg
4770	6.1298	0.515185	5.28439	0.816816	6.87055	0.561027	42.3846	-71.1332	Boston	8	8	/images/id_4770_400_300.jpg
4771	4.6455	0.52784	3.57725	0.728064	5.00715	0.686174	42.3575	-71.1083	Boston	330	9	/images/id_4771_400_300.jpg
4440	3.46756	0.528655	5.52156	0.747263	4.1507	0.649239	42.3632	-71.1056	Boston	354	0	/images/id_4440_400_300.jpg
4778	7.3577	0.458607	5.77423	0.834493	6.99604	0.600618	42.2915	-71.0495	Boston	9	7	/images/id_4778_400_300.jpg
4779	5.14741	0.479757	4.63961	0.711948	5.84552	0.593875	42.3571	-71.1462	Boston	317	2	/images/id_4779_400_300.jpg
4174	5.51463	0.51621	4.09075	0.721742	6.1416	0.653515	40.6294	-74.0292	New York City	329	5	/images/id_4174_400_300.jpg
4175	6.40031	0.508802	6.16561	0.787695	7.53529	0.607473	40.7583	-73.9727	New York City	276	15	/images/id_4175_400_300.jpg
4176	2.2953	0.497005	3.3769	0.867249	1.31093	0.521441	40.6717	-73.9941	New York City	343	3	/images/id_4176_400_300.jpg
4177	2.13337	0.540652	3.07163	0.551803	1.18298	0.53873	40.7188	-73.9485	New York City	39	1	/images/id_4177_400_300.jpg
4170	5.86273	0.455537	4.37061	0.783345	4.4521	0.568623	40.6982	-73.8467	New York City	25	12	/images/id_4170_400_300.jpg
4171	3.80524	0.600917	4.81893	0.69148	3.98981	0.646949	40.704	-73.8297	New York City	27	12	/images/id_4171_400_300.jpg
4172	4.63564	0.585754	4.51124	0.774865	4.60176	0.621252	40.6234	-73.9864	New York City	351	10	/images/id_4172_400_300.jpg
4173	2.0157	0.463576	1.88402	0.5387	0.973206	0.469732	40.6104	-73.9233	New York City	97	17	/images/id_4173_400_300.jpg
4178	4.01786	0.539937	5.54794	0.577686	4.36724	0.623687	40.6683	-73.9863	New York City	345	3	/images/id_4178_400_300.jpg
4179	0.941344	0.447162	2.65775	0.604892	1.14774	0.503174	40.6362	-73.9287	New York City	21	0	/images/id_4179_400_300.jpg
3065	4.61693	0.561575	4.52661	0.752858	5.49086	0.574656	47.7895	13.0698	Salzburg	NULL	NULL	/images/id_3065_400_300.jpg
3064	4.99733	0.476061	4.23084	0.681363	4.66226	0.640076	47.7898	13.0713	Salzburg	NULL	NULL	/images/id_3064_400_300.jpg
4619	5.70594	0.578236	5.79558	0.861971	6.11543	0.669268	42.3166	-71.0625	Boston	336	2	/images/id_4619_400_300.jpg
4618	1.60825	0.449194	3.14899	0.617837	1.46535	0.439702	42.2909	-71.0776	Boston	28	2	/images/id_4618_400_300.jpg
238	5.72397	0.525162	5.18628	0.597731	6.09078	0.447423	40.8161	-73.9435	New York City	147	3	/images/id_238_400_300.jpg
239	6.31851	0.463006	4.12619	0.622427	6.32302	0.495992	40.6173	-74.0131	New York City	147	1	/images/id_239_400_300.jpg
234	5.12271	0.559813	4.52065	0.672178	4.72508	0.55849	40.7408	-73.9268	New York City	161	2	/images/id_234_400_300.jpg
4610	5.91297	0.487491	6.47377	0.645625	6.11907	0.522417	42.3453	-71.12	Boston	348	0	/images/id_4610_400_300.jpg
4613	6.57816	0.521196	5.21133	0.857216	5.93153	0.6318	42.3537	-71.1466	Boston	336	5	/images/id_4613_400_300.jpg
4612	4.80489	0.532075	4.02757	0.689409	5.73351	0.562814	42.3521	-71.1303	Boston	327	1	/images/id_4612_400_300.jpg
230	5.81679	0.431082	4.50335	0.635454	5.59362	0.627055	40.8104	-73.9152	New York City	186	8	/images/id_230_400_300.jpg
231	5.25331	0.4945	5.39758	0.573175	3.93104	0.549713	40.6692	-73.9139	New York City	221	5	/images/id_231_400_300.jpg
4617	4.42916	0.544324	5.44084	0.720916	5.10859	0.496807	42.2946	-71.0575	Boston	28	7	/images/id_4617_400_300.jpg
233	3.11027	0.259849	4.68401	0.702197	2.95171	0.144565	40.6443	-73.9908	New York City	280	6	/images/id_233_400_300.jpg
4680	4.77208	0.519852	3.80063	0.933981	5.5597	0.706718	42.3823	-71.1371	Boston	330	4	/images/id_4680_400_300.jpg
2228	5.5438	0.409962	6.53156	0.521535	5.16543	0.553132	48.2978	14.2908	Linz	NULL	NULL	/images/id_2228_400_300.jpg
2229	7.04629	0.419466	7.19824	0.295537	6.47888	0.475778	48.2983	14.2913	Linz	NULL	NULL	/images/id_2229_400_300.jpg
2226	5.44612	0.496912	5.14569	0.863381	4.81332	0.558935	48.2982	14.291	Linz	NULL	NULL	/images/id_2226_400_300.jpg
2227	5.94615	0.387975	5.45741	0.721452	6.23339	0.531875	48.2978	14.2908	Linz	NULL	NULL	/images/id_2227_400_300.jpg
2224	5.99846	0.46816	6.06938	0.680463	5.75687	0.605316	48.2962	14.2952	Linz	NULL	NULL	/images/id_2224_400_300.jpg
2225	5.45195	0.461452	5.12408	0.696992	4.71247	0.574943	48.2962	14.2952	Linz	NULL	NULL	/images/id_2225_400_300.jpg
2222	6.52812	0.496313	5.97701	0.758512	5.54588	0.572109	48.2962	14.2952	Linz	NULL	NULL	/images/id_2222_400_300.jpg
2223	6.24533	0.477016	6.49872	0.533631	6.0216	0.484493	48.2962	14.2952	Linz	NULL	NULL	/images/id_2223_400_300.jpg
2220	3.81247	0.398418	5.25167	0.629749	3.63152	0.412585	48.296	14.2932	Linz	NULL	NULL	/images/id_2220_400_300.jpg
2221	5.62325	0.465716	6.23867	0.495772	6.69322	0.347862	48.2958	14.2928	Linz	NULL	NULL	/images/id_2221_400_300.jpg
1	4.06428	0.501222	3.79136	0.475284	2.7687	0.215421	42.3619	-71.0565	Boston	298	8	/images/id_1_400_300.jpg
146	7.06854	0.290994	7.19373	0.253421	7.32184	0.50582	40.6982	-73.9964	New York City	177	3	/images/id_146_400_300.jpg
147	3.60219	0.332354	3.20877	0.109839	3.98974	0.501832	40.5845	-73.931	New York City	221	-1	/images/id_147_400_300.jpg
144	3.76237	0.403858	6.07193	0.800577	4.32506	0.553716	40.6681	-73.9007	New York City	206	1	/images/id_144_400_300.jpg
145	4.79746	0.447642	5.76098	0.727778	4.54928	0.542289	40.8178	-73.9399	New York City	155	0	/images/id_145_400_300.jpg
142	3.74679	0.458431	4.53364	0.646238	4.23232	0.484135	40.6538	-73.956	New York City	236	-4	/images/id_142_400_300.jpg
143	4.85213	0.562471	5.51621	0.941128	4.28928	0.469533	40.6874	-73.8602	New York City	242	-1	/images/id_143_400_300.jpg
140	4.31065	0.455341	3.7151	0.507905	4.33931	0.592134	40.6631	-73.9378	New York City	114	3	/images/id_140_400_300.jpg
141	3.43578	0.387944	4.11102	0.675885	3.14846	0.334363	40.6142	-73.9413	New York City	175	1	/images/id_141_400_300.jpg
148	4.43083	0.544789	3.02711	0.264185	3.49086	0.41446	40.7639	-73.9977	New York City	118	4	/images/id_148_400_300.jpg
149	4.68284	0.447444	5.30353	0.705721	3.62772	0.435125	40.8723	-73.9195	New York City	171	2	/images/id_149_400_300.jpg
4505	2.15648	0.542636	1.98078	0.597199	2.97815	0.582697	42.3302	-71.0855	Boston	352	0	/images/id_4505_400_300.jpg
4504	5.38307	0.619507	3.7261	0.674315	5.04402	0.586749	42.3913	-71.1104	Boston	336	2	/images/id_4504_400_300.jpg
4507	6.52888	0.541947	4.35201	0.644451	6.69882	0.529169	42.3772	-71.1337	Boston	134	0	/images/id_4507_400_300.jpg
4506	5.60007	0.52398	5.97888	0.760435	5.31244	0.572595	42.3852	-71.1156	Boston	30	4	/images/id_4506_400_300.jpg
4501	6.48758	0.564904	5.99346	0.73849	7.02976	0.636235	42.3127	-71.0547	Boston	50	1	/images/id_4501_400_300.jpg
4500	3.57158	0.548575	2.76469	0.761904	1.41578	0.545886	42.3925	-71.0931	Boston	269	-1	/images/id_4500_400_300.jpg
4503	4.98418	0.559989	4.57889	0.824396	3.02682	0.52804	42.3072	-71.0824	Boston	15	1	/images/id_4503_400_300.jpg
4502	8.05203	0.589502	4.45693	0.797152	6.47793	0.597076	42.3328	-71.1373	Boston	85	-2	/images/id_4502_400_300.jpg
4509	0.924566	0.421324	2.69601	0.675284	1.11088	0.487699	42.3866	-71.0339	Boston	313	7	/images/id_4509_400_300.jpg
4508	6.68469	0.484094	6.19142	0.718616	7.00619	0.597154	42.3169	-71.1109	Boston	344	7	/images/id_4508_400_300.jpg
3401	4.94504	0.570758	4.66428	0.678059	5.31344	0.63465	47.8178	13.0302	Salzburg	NULL	NULL	/images/id_3401_400_300.jpg
2088	5.23873	0.488733	4.36888	0.708951	5.52268	0.550137	48.3185	14.2832	Linz	NULL	NULL	/images/id_2088_400_300.jpg
2089	5.0641	0.419805	6.17341	0.641364	5.03314	0.563116	48.3183	14.2833	Linz	NULL	NULL	/images/id_2089_400_300.jpg
121	6.51967	0.387707	5.89197	0.716077	6.00594	0.596928	40.6257	-73.9515	New York City	195	7	/images/id_121_400_300.jpg
2082	4.25926	0.430387	4.99081	0.599573	3.49156	0.277864	48.3178	14.28	Linz	NULL	NULL	/images/id_2082_400_300.jpg
2083	4.64691	0.571284	4.44347	0.670166	4.68586	0.770006	48.3175	14.2802	Linz	NULL	NULL	/images/id_2083_400_300.jpg
2080	5.81347	0.457711	4.29051	0.641207	5.82187	0.551779	48.3193	14.2788	Linz	NULL	NULL	/images/id_2080_400_300.jpg
2081	4.62272	0.49471	4.72875	0.530096	5.60696	0.480636	48.3188	14.2793	Linz	NULL	NULL	/images/id_2081_400_300.jpg
2086	5.41707	0.447888	6.17367	0.600026	4.64706	0.453614	48.3182	14.2805	Linz	NULL	NULL	/images/id_2086_400_300.jpg
2087	5.81791	0.465501	5.77127	0.580385	5.28102	0.491231	48.3187	14.2828	Linz	NULL	NULL	/images/id_2087_400_300.jpg
2084	5.00678	0.454954	6.03996	0.672426	6.42646	0.466138	48.3178	14.2803	Linz	NULL	NULL	/images/id_2084_400_300.jpg
2085	5.46612	0.583829	4.8382	0.660439	6.16915	0.501362	48.3178	14.2803	Linz	NULL	NULL	/images/id_2085_400_300.jpg
3342	4.91707	0.429784	4.78824	0.705935	6.47455	0.574174	47.79	13.0502	Salzburg	NULL	NULL	/images/id_3342_400_300.jpg
3402	5.11607	0.503252	4.26854	0.575509	5.61212	0.58589	47.8177	13.03	Salzburg	NULL	NULL	/images/id_3402_400_300.jpg
1190	3.19884	0.292232	3.72378	0.634487	3.91266	0.495678	42.3425	-71.0665	Boston	126	0	/images/id_1190_400_300.jpg
124	6.84084	0.297431	5.25241	0.705958	6.89649	0.466268	40.6862	-73.9685	New York City	204	0	/images/id_124_400_300.jpg
1193	5.00319	0.504139	5.14222	0.760935	5.86932	0.608862	42.3203	-71.1035	Boston	192	0	/images/id_1193_400_300.jpg
125	4.50071	0.507281	3.74295	0.577196	5.24569	0.538409	40.5966	-73.9886	New York City	192	-4	/images/id_125_400_300.jpg
3341	5.31763	0.460212	5.95959	0.712664	5.73281	0.62678	47.7947	13.0317	Salzburg	NULL	NULL	/images/id_3341_400_300.jpg
126	5.54302	0.447281	5.63623	0.733249	4.84318	0.547575	40.732	-73.9001	New York City	209	8	/images/id_126_400_300.jpg
3093	5.99843	0.440418	4.1247	0.605997	5.34171	0.493604	47.7997	13.0537	Salzburg	NULL	NULL	/images/id_3093_400_300.jpg
1194	3.45911	0.371017	3.94425	0.540159	3.33253	0.391777	42.3799	-71.0903	Boston	131	-3	/images/id_1194_400_300.jpg
128	5.00067	0.451339	3.6017	0.417456	4.7805	0.561571	40.6117	-73.9472	New York City	46	-3	/images/id_128_400_300.jpg
1197	3.71124	0.518614	3.71808	0.416036	3.38357	0.306279	42.4034	-71.0627	Boston	139	1	/images/id_1197_400_300.jpg
3408	4.51394	0.38569	3.76528	0.705131	5.90821	0.589429	47.8172	13.0328	Salzburg	NULL	NULL	/images/id_3408_400_300.jpg
3345	4.36396	0.480559	3.31232	0.462798	3.76381	0.780952	47.8117	13.0258	Salzburg	NULL	NULL	/images/id_3345_400_300.jpg
1832	4.60465	0.448505	6.4087	0.564045	4.53222	0.652436	48.275	14.3013	Linz	NULL	NULL	/images/id_1832_400_300.jpg
1833	5.8153	0.476342	4.98393	0.521686	6.33728	0.542863	48.2742	14.3025	Linz	NULL	NULL	/images/id_1833_400_300.jpg
1830	5.25302	0.464608	5.42223	0.725055	5.20403	0.526859	48.275	14.3012	Linz	NULL	NULL	/images/id_1830_400_300.jpg
1831	3.81084	0.384909	3.63278	0.648859	4.74523	0.515907	48.275	14.3013	Linz	NULL	NULL	/images/id_1831_400_300.jpg
1836	5.0098	0.526988	4.78206	0.741901	5.22313	0.47622	48.2733	14.3027	Linz	NULL	NULL	/images/id_1836_400_300.jpg
1837	5.79623	0.49208	5.50517	0.753989	5.90208	0.443786	48.272	14.2987	Linz	NULL	NULL	/images/id_1837_400_300.jpg
1834	4.88373	0.399649	4.32159	0.794991	6.36305	0.58144	48.2733	14.3027	Linz	NULL	NULL	/images/id_1834_400_300.jpg
1835	3.41647	0.403246	3.66342	0.476478	5.0213	0.506403	48.2733	14.3027	Linz	NULL	NULL	/images/id_1835_400_300.jpg
3795	4.55906	0.489629	4.2269	0.829713	3.97834	0.601724	40.8215	-73.9212	New York City	129	3	/images/id_3795_400_300.jpg
3794	5.4979	0.578894	4.84135	0.764433	5.29952	0.624094	40.6762	-73.9516	New York City	311	5	/images/id_3794_400_300.jpg
3797	5.60302	0.637757	5.01025	0.624011	5.19365	0.658984	40.6375	-73.9886	New York City	270	3	/images/id_3797_400_300.jpg
1839	5.73802	0.460484	5.13274	0.780227	4.91869	0.515411	48.2717	14.2988	Linz	NULL	NULL	/images/id_1839_400_300.jpg
3791	3.02408	0.588482	3.73162	0.716936	3.25344	0.589053	40.7745	-73.9367	New York City	51	4	/images/id_3791_400_300.jpg
3790	2.64962	0.518462	2.56122	0.665079	3.3632	0.618677	40.7226	-73.8499	New York City	301	6	/images/id_3790_400_300.jpg
3793	4.07367	0.55399	7.33183	0.79097	4.82616	0.654111	40.7118	-73.9969	New York City	144	11	/images/id_3793_400_300.jpg
3792	6.62322	0.550153	6.52435	0.785851	5.11071	0.624337	40.7047	-73.9617	New York City	351	1	/images/id_3792_400_300.jpg
2154	4.41444	0.479452	5.37439	0.682112	4.65071	0.513193	48.312	14.2877	Linz	NULL	NULL	/images/id_2154_400_300.jpg
2155	5.7115	0.454469	7.1279	0.578224	6.91017	0.427242	48.3117	14.2875	Linz	NULL	NULL	/images/id_2155_400_300.jpg
939	6.14669	0.426689	5.02919	0.677913	5.94751	0.45485	42.3462	-71.0739	Boston	107	5	/images/id_939_400_300.jpg
2157	3.71328	0.495278	3.3398	0.38097	3.7067	0.493497	48.3098	14.2838	Linz	NULL	NULL	/images/id_2157_400_300.jpg
2150	5.32385	0.376481	7.31097	0.495085	7.04151	0.347933	48.314	14.2772	Linz	NULL	NULL	/images/id_2150_400_300.jpg
2151	5.72593	0.482635	4.83124	0.709924	5.48131	0.596488	48.3183	14.2768	Linz	NULL	NULL	/images/id_2151_400_300.jpg
2152	4.76361	0.478899	4.02163	0.600248	4.30812	0.497986	48.3142	14.2865	Linz	NULL	NULL	/images/id_2152_400_300.jpg
2153	4.22544	0.592867	4.13864	0.639613	3.68619	0.370427	48.3133	14.2868	Linz	NULL	NULL	/images/id_2153_400_300.jpg
933	3.611	0.331199	4.04586	0.582208	3.33429	0.480742	42.3367	-71.0837	Boston	180	2	/images/id_933_400_300.jpg
932	5.58843	0.506576	4.99572	0.752654	4.68892	0.539039	42.3759	-71.0583	Boston	180	-2	/images/id_932_400_300.jpg
931	4.74039	0.48251	5.54695	0.688866	6.03736	0.577414	42.301	-71.0687	Boston	185	6	/images/id_931_400_300.jpg
930	5.8453	0.549887	5.38225	0.564142	4.81029	0.522568	42.3156	-71.0715	Boston	129	1	/images/id_930_400_300.jpg
2158	4.03634	0.426584	4.66278	0.571762	3.8904	0.505322	48.3137	14.2853	Linz	NULL	NULL	/images/id_2158_400_300.jpg
2159	4.77177	0.470389	4.43679	0.571369	5.4269	0.645869	48.3137	14.2853	Linz	NULL	NULL	/images/id_2159_400_300.jpg
935	3.98247	0.388228	4.55722	0.735278	5.16337	0.671293	42.3671	-71.0944	Boston	175	2	/images/id_935_400_300.jpg
934	4.98536	0.568864	4.60865	0.698461	5.99731	0.537966	42.3373	-71.0504	Boston	171	2	/images/id_934_400_300.jpg
4874	5.1673	0.511865	3.86728	0.774924	5.36471	0.678916	42.3355	-71.0707	Boston	0	12	/images/id_4874_400_300.jpg
3055	4.83645	0.454687	5.66263	0.784651	3.52516	0.470198	47.7987	13.0612	Salzburg	NULL	NULL	/images/id_3055_400_300.jpg
1955	6.37598	0.516138	5.23279	0.846719	5.37891	0.551358	48.2935	14.316	Linz	NULL	NULL	/images/id_1955_400_300.jpg
1954	3.78991	0.441642	4.14104	0.56024	4.87061	0.568301	48.2923	14.3157	Linz	NULL	NULL	/images/id_1954_400_300.jpg
1957	5.64523	0.449583	5.36254	0.743791	6.27271	0.558354	48.2947	14.3155	Linz	NULL	NULL	/images/id_1957_400_300.jpg
1956	4.48803	0.314774	5.02133	0.695945	4.51725	0.509402	48.2942	14.3157	Linz	NULL	NULL	/images/id_1956_400_300.jpg
1951	3.55689	0.477054	3.70759	0.435631	4.77807	0.503324	48.2913	14.317	Linz	NULL	NULL	/images/id_1951_400_300.jpg
1950	3.78333	0.414575	3.29077	0.505533	3.60122	0.2879	48.2915	14.3168	Linz	NULL	NULL	/images/id_1950_400_300.jpg
1953	5.42524	0.538492	3.39004	0.70415	4.27297	0.613415	48.2922	14.3157	Linz	NULL	NULL	/images/id_1953_400_300.jpg
1952	5.10739	0.424404	3.79257	0.635747	5.15661	0.495788	48.2922	14.3157	Linz	NULL	NULL	/images/id_1952_400_300.jpg
4408	6.71116	0.506769	5.20256	0.852748	7.9463	0.559535	42.3831	-71.129	Boston	276	2	/images/id_4408_400_300.jpg
1959	6.23785	0.458794	5.77426	0.611297	5.46501	0.589281	48.2948	14.314	Linz	NULL	NULL	/images/id_1959_400_300.jpg
1958	5.36502	0.526431	6.72159	0.559176	6.64571	0.406986	48.2945	14.314	Linz	NULL	NULL	/images/id_1958_400_300.jpg
1828	5.38324	0.518647	6.21121	0.497791	6.31236	0.585278	48.2748	14.3007	Linz	NULL	NULL	/images/id_1828_400_300.jpg
3249	4.8016	0.51981	5.40102	0.640402	4.87338	0.503805	47.8117	13.0317	Salzburg	NULL	NULL	/images/id_3249_400_300.jpg
3248	4.65938	0.446931	4.72034	0.586817	4.41374	0.488972	47.8117	13.0318	Salzburg	NULL	NULL	/images/id_3248_400_300.jpg
3096	5.65861	0.496973	6.67841	0.51705	5.82528	0.533073	47.8013	13.0447	Salzburg	NULL	NULL	/images/id_3096_400_300.jpg
3243	5.93068	0.508578	4.19444	0.56295	4.58414	0.387145	47.811	13.0395	Salzburg	NULL	NULL	/images/id_3243_400_300.jpg
3242	4.85159	0.547952	3.57426	0.490921	4.66512	0.607567	47.8102	13.0408	Salzburg	NULL	NULL	/images/id_3242_400_300.jpg
3241	3.43787	0.408019	3.44646	0.444014	4.15949	0.549742	47.8098	13.0427	Salzburg	NULL	NULL	/images/id_3241_400_300.jpg
3240	4.67223	0.492989	3.70452	0.507856	4.3104	0.593137	47.8092	13.041	Salzburg	NULL	NULL	/images/id_3240_400_300.jpg
3247	4.18732	0.489667	5.52392	0.674617	4.43346	0.545717	47.8113	13.0333	Salzburg	NULL	NULL	/images/id_3247_400_300.jpg
3246	5.23988	0.507722	4.67349	0.715481	6.04795	0.504147	47.8112	13.0347	Salzburg	NULL	NULL	/images/id_3246_400_300.jpg
3245	5.21679	0.427308	5.87075	0.611899	5.01147	0.537997	47.8112	13.0358	Salzburg	NULL	NULL	/images/id_3245_400_300.jpg
3244	4.63698	0.54651	5.51172	0.436135	4.3562	0.508964	47.8105	13.038	Salzburg	NULL	NULL	/images/id_3244_400_300.jpg
4404	7.24133	0.499272	4.37307	0.690885	7.05105	0.587651	42.3822	-71.1162	Boston	348	9	/images/id_4404_400_300.jpg
828	4.78963	0.48456	5.0087	0.706138	4.35736	0.523481	40.7294	-73.9779	New York City	156	5	/images/id_828_400_300.jpg
4405	6.25323	0.554157	5.51305	0.743924	5.94624	0.611757	42.3505	-71.1543	Boston	333	0	/images/id_4405_400_300.jpg
825	4.65917	0.46526	4.66552	0.575456	4.62157	0.555763	40.6608	-73.9515	New York City	123	4	/images/id_825_400_300.jpg
824	3.9755	0.435939	4.97914	0.728449	4.97638	0.554555	40.7667	-73.9385	New York City	194	7	/images/id_824_400_300.jpg
827	4.81369	0.453759	4.54753	0.68166	4.27682	0.540703	40.8115	-73.9668	New York City	184	2	/images/id_827_400_300.jpg
826	3.02552	0.348045	4.37181	0.508481	4.33094	0.449553	40.7719	-73.9931	New York City	156	3	/images/id_826_400_300.jpg
821	5.4567	0.488712	4.28295	0.713558	5.06063	0.593075	40.7635	-73.8676	New York City	166	4	/images/id_821_400_300.jpg
4406	5.87521	0.553965	5.70976	0.700989	5.54853	0.682064	42.3544	-71.1311	Boston	36	2	/images/id_4406_400_300.jpg
823	5.22969	0.537724	5.41325	0.737063	4.93194	0.507124	40.7541	-73.9902	New York City	152	5	/images/id_823_400_300.jpg
822	3.21398	0.311909	4.16722	0.648608	3.2206	0.138155	40.7266	-73.939	New York City	200	4	/images/id_822_400_300.jpg
1177	3.34582	0.361789	2.98851	0.475783	3.17759	0.35476	42.3983	-71.1325	Boston	234	-4	/images/id_1177_400_300.jpg
4407	6.83792	0.530226	5.55512	0.694704	8.31529	0.595354	42.3852	-71.1209	Boston	34	1	/images/id_4407_400_300.jpg
4258	4.35086	0.489503	4.18107	0.774732	4.02582	0.583891	40.6128	-74.0011	New York City	349	17	/images/id_4258_400_300.jpg
4400	6.96445	0.567994	4.37495	0.677416	6.1576	0.573047	42.3379	-71.0812	Boston	357	6	/images/id_4400_400_300.jpg
4312	6.86075	0.572332	5.14857	0.859318	7.78252	0.765072	40.6438	-73.9668	New York City	20	3	/images/id_4312_400_300.jpg
4401	5.58992	0.504426	4.7048	0.915621	6.85912	0.668945	42.388	-71.0481	Boston	340	5	/images/id_4401_400_300.jpg
1483	5.82819	0.500201	4.59609	0.639517	4.12699	0.533131	42.3251	-71.0593	Boston	182	5	/images/id_1483_400_300.jpg
1482	4.49115	0.399458	4.67142	0.770759	5.60543	0.462548	42.3465	-71.1472	Boston	325	3	/images/id_1482_400_300.jpg
1481	3.55382	0.449072	2.83372	0.38281	3.15871	0.436685	42.3258	-71.0566	Boston	304	2	/images/id_1481_400_300.jpg
1480	5.12453	0.44596	3.71851	0.621318	4.60168	0.554952	42.3202	-71.0751	Boston	146	2	/images/id_1480_400_300.jpg
1487	5.19193	0.465692	3.98041	0.569647	5.71998	0.513757	42.3124	-71.0666	Boston	151	0	/images/id_1487_400_300.jpg
1486	5.69534	0.521937	5.86896	0.66275	5.28349	0.563031	42.3495	-71.0404	Boston	266	0	/images/id_1486_400_300.jpg
1485	6.8341	0.352364	5.28858	0.668791	6.25022	0.51488	42.3736	-71.1038	Boston	54	-2	/images/id_1485_400_300.jpg
3309	5.15033	0.472056	4.96333	0.677079	4.65228	0.634971	47.8002	13.0102	Salzburg	NULL	NULL	/images/id_3309_400_300.jpg
3306	5.15968	0.439212	4.33765	0.470688	3.8896	0.511576	47.7985	13.0195	Salzburg	NULL	NULL	/images/id_3306_400_300.jpg
3307	4.88541	0.54961	4.64294	0.672639	4.38927	0.541257	47.7992	13.0187	Salzburg	NULL	NULL	/images/id_3307_400_300.jpg
1489	5.31614	0.434409	4.76535	0.584865	5.05923	0.461316	42.3148	-71.1148	Boston	321	2	/images/id_1489_400_300.jpg
1488	4.56961	0.480716	5.16497	0.719843	4.28632	0.488653	42.3321	-71.0728	Boston	87	3	/images/id_1488_400_300.jpg
3302	4.18282	0.5582	4.43904	0.817657	4.2413	0.485037	47.7973	13.021	Salzburg	NULL	NULL	/images/id_3302_400_300.jpg
3303	5.28822	0.523997	6.38917	0.549879	5.07574	0.655174	47.7975	13.0207	Salzburg	NULL	NULL	/images/id_3303_400_300.jpg
3300	4.9055	0.417331	4.73289	0.606762	5.04343	0.59188	47.7972	13.0222	Salzburg	NULL	NULL	/images/id_3300_400_300.jpg
3301	5.11222	0.596539	6.5381	0.621673	4.04344	0.477767	47.797	13.0215	Salzburg	NULL	NULL	/images/id_3301_400_300.jpg
797	6.1236	0.436479	6.44548	0.503462	6.30048	0.559988	40.643	-74.0114	New York City	167	1	/images/id_797_400_300.jpg
2147	5.62658	0.456239	4.68629	0.816847	5.38785	0.46255	48.3142	14.2718	Linz	NULL	NULL	/images/id_2147_400_300.jpg
1711	4.28221	0.434496	4.50127	0.825062	4.14619	0.57946	48.2712	14.2693	Linz	NULL	NULL	/images/id_1711_400_300.jpg
794	5.52302	0.519418	6.17603	0.686031	6.85854	0.437526	40.7306	-73.9956	New York City	185	1	/images/id_794_400_300.jpg
1717	5.9664	0.471797	4.38934	0.742165	4.47735	0.586907	48.2768	14.2763	Linz	NULL	NULL	/images/id_1717_400_300.jpg
792	4.99781	0.47461	6.31284	0.74506	3.55045	0.366482	40.6918	-73.9485	New York City	148	2	/images/id_792_400_300.jpg
791	6.15642	0.412231	5.00336	0.670474	4.57759	0.50402	40.8164	-73.9189	New York City	145	3	/images/id_791_400_300.jpg
2146	5.76546	0.456789	5.69189	0.642212	6.66537	0.410117	48.3142	14.2718	Linz	NULL	NULL	/images/id_2146_400_300.jpg
1719	4.4788	0.464752	6.71464	0.411055	6.45436	0.410542	48.2748	14.2773	Linz	NULL	NULL	/images/id_1719_400_300.jpg
1718	5.14032	0.528415	4.3361	0.751185	5.09433	0.60055	48.2757	14.2792	Linz	NULL	NULL	/images/id_1718_400_300.jpg
799	3.03105	0.319926	3.08931	0.386005	2.76919	0.316657	40.6279	-73.899	New York City	184	2	/images/id_799_400_300.jpg
798	3.06882	0.357506	3.90443	0.656987	2.73258	0.202923	40.6359	-73.9126	New York City	286	0	/images/id_798_400_300.jpg
4318	6.47833	0.551922	3.67023	0.756594	5.5853	0.575473	40.6281	-73.922	New York City	22	5	/images/id_4318_400_300.jpg
1271	6.34501	0.417021	4.66164	0.60543	5.67316	0.570271	42.3377	-71.0979	Boston	187	-5	/images/id_1271_400_300.jpg
610	4.69659	0.452925	3.16229	0.222096	4.77978	0.703977	40.6887	-73.8402	New York City	187	8	/images/id_610_400_300.jpg
1139	5.07824	0.551361	4.67613	0.828223	5.20697	0.558052	42.4038	-71.1254	Boston	148	3	/images/id_1139_400_300.jpg
1273	5.49689	0.526874	5.10673	0.714715	3.88712	0.491483	42.2835	-71.0581	Boston	108	0	/images/id_1273_400_300.jpg
3051	5.3102	0.507511	6.69787	0.61915	5.65125	0.579918	47.7958	13.0533	Salzburg	NULL	NULL	/images/id_3051_400_300.jpg
4063	4.21965	0.58413	4.38383	0.642141	4.67013	0.572472	40.6877	-73.918	New York City	16	6	/images/id_4063_400_300.jpg
1133	6.04192	0.501171	5.2125	0.745191	6.71246	0.421127	42.3706	-71.0987	Boston	171	0	/images/id_1133_400_300.jpg
1132	5.01294	0.499714	3.86284	0.555876	5.44603	0.600143	42.2939	-71.0557	Boston	186	0	/images/id_1132_400_300.jpg
1131	6.7105	0.32877	5.58632	0.926137	7.01871	0.375474	42.3086	-71.1142	Boston	103	3	/images/id_1131_400_300.jpg
1130	6.42903	0.455373	5.1128	0.74641	6.47271	0.489203	42.3689	-71.1056	Boston	188	0	/images/id_1130_400_300.jpg
1137	4.12304	0.411403	4.52123	0.794649	3.82342	0.440871	42.38	-71.0315	Boston	209	0	/images/id_1137_400_300.jpg
1136	5.00041	0.562459	4.94573	0.672531	6.0192	0.489875	42.3567	-71.1113	Boston	184	0	/images/id_1136_400_300.jpg
1134	4.98537	0.642675	5.33632	0.677992	5.41364	0.528845	42.2942	-71.0742	Boston	172	-1	/images/id_1134_400_300.jpg
4257	2.73986	0.481243	3.05925	0.699683	2.95382	0.475988	40.6666	-73.8479	New York City	113	3	/images/id_4257_400_300.jpg
2061	3.65804	0.463182	4.07876	0.508241	3.69069	0.488255	48.3235	14.2875	Linz	NULL	NULL	/images/id_2061_400_300.jpg
4066	6.2047	0.478882	4.52327	0.820103	6.57285	0.653851	40.7503	-73.9733	New York City	344	6	/images/id_4066_400_300.jpg
4256	1.64581	0.477959	1.88611	0.578744	2.03557	0.490559	40.6784	-73.8331	New York City	336	11	/images/id_4256_400_300.jpg
3018	5.92358	0.440495	4.89539	0.614739	6.82774	0.479054	47.7953	13.0193	Salzburg	NULL	NULL	/images/id_3018_400_300.jpg
3019	5.1481	0.507324	5.34548	0.732685	6.46106	0.403989	47.7952	13.0195	Salzburg	NULL	NULL	/images/id_3019_400_300.jpg
1994	3.80432	0.387395	3.68911	0.414467	3.81147	0.453555	48.302	14.3102	Linz	NULL	NULL	/images/id_1994_400_300.jpg
3012	4.56024	0.471626	5.71424	0.919121	4.53213	0.43957	47.8025	13.0193	Salzburg	NULL	NULL	/images/id_3012_400_300.jpg
3013	5.43535	0.407809	4.6396	0.786018	3.58022	0.538783	47.8025	13.0193	Salzburg	NULL	NULL	/images/id_3013_400_300.jpg
3010	4.51303	0.498395	4.07299	0.42652	4.20091	0.618053	47.8027	13.0138	Salzburg	NULL	NULL	/images/id_3010_400_300.jpg
3011	3.95497	0.43207	4.71103	0.745506	5.33123	0.594807	47.8038	13.018	Salzburg	NULL	NULL	/images/id_3011_400_300.jpg
3016	4.85633	0.569161	5.8461	0.71624	5.66202	0.427411	47.7963	13.0182	Salzburg	NULL	NULL	/images/id_3016_400_300.jpg
3017	4.83972	0.587132	5.78413	0.781713	6.65636	0.491016	47.7957	13.0188	Salzburg	NULL	NULL	/images/id_3017_400_300.jpg
3014	4.46409	0.442088	4.98067	0.829835	4.402	0.592256	47.7985	13.0217	Salzburg	NULL	NULL	/images/id_3014_400_300.jpg
3015	3.19718	0.39635	4.54839	0.580304	4.67659	0.549436	47.7967	13.0175	Salzburg	NULL	NULL	/images/id_3015_400_300.jpg
519	4.54273	0.477579	4.18372	0.629245	4.24444	0.61462	40.7574	-74.0048	New York City	185	2	/images/id_519_400_300.jpg
518	3.50099	0.443029	4.70937	0.68417	3.82596	0.480965	40.7518	-73.8613	New York City	222	4	/images/id_518_400_300.jpg
2149	5.3157	0.504511	5.28861	0.792117	5.91364	0.540784	48.3147	14.2758	Linz	NULL	NULL	/images/id_2149_400_300.jpg
1009	4.59215	0.452822	4.08453	0.577041	4.70859	0.490122	42.359	-71.1269	Boston	200	-1	/images/id_1009_400_300.jpg
1008	6.25163	0.425568	5.88141	0.651546	5.13932	0.634635	42.3314	-71.0379	Boston	137	2	/images/id_1008_400_300.jpg
1007	4.83727	0.50314	5.65791	0.854142	4.71726	0.583462	42.3119	-71.1143	Boston	152	3	/images/id_1007_400_300.jpg
510	5.53874	0.362292	5.25438	0.631855	4.53239	0.483574	40.6282	-74.0251	New York City	146	5	/images/id_510_400_300.jpg
1005	4.51918	0.567124	4.92481	0.805263	4.92573	0.817714	42.3588	-71.1085	Boston	172	11	/images/id_1005_400_300.jpg
512	5.5905	0.419618	5.49559	0.978536	5.42559	0.55068	40.6387	-73.9998	New York City	163	3	/images/id_512_400_300.jpg
1003	4.23293	0.408096	5.45807	0.767597	5.09917	0.660405	42.3477	-71.0451	Boston	343	9	/images/id_1003_400_300.jpg
514	5.07903	0.503826	5.96267	0.59316	5.30114	0.552876	40.7672	-73.982	New York City	149	4	/images/id_514_400_300.jpg
517	5.49239	0.426585	5.35354	0.784027	6.31273	0.532673	40.7779	-73.9598	New York City	135	6	/images/id_517_400_300.jpg
1000	4.29023	0.421697	4.22117	0.601279	4.55972	0.603126	42.398	-71.1035	Boston	197	4	/images/id_1000_400_300.jpg
4189	8.32724	0.602638	7.10844	0.738665	7.59467	0.634063	40.6948	-73.9712	New York City	33	11	/images/id_4189_400_300.jpg
1226	5.59082	0.448462	6.96949	0.376166	7.27347	0.260173	42.3391	-71.1233	Boston	170	2	/images/id_1226_400_300.jpg
621	3.12243	0.231726	4.01321	0.841101	3.33151	0.395149	40.6438	-74.0202	New York City	154	1	/images/id_621_400_300.jpg
1224	3.91088	0.431879	4.97803	0.71746	6.00096	0.541556	42.313	-71.0943	Boston	169	0	/images/id_1224_400_300.jpg
627	4.66006	0.448654	4.35445	0.568306	4.27342	0.581146	40.7019	-73.9946	New York City	184	5	/images/id_627_400_300.jpg
626	3.36738	0.342802	3.62231	0.530882	2.74338	0.242506	40.6221	-73.992	New York City	145	5	/images/id_626_400_300.jpg
1221	4.21432	0.536981	4.2449	0.783113	4.9305	0.572887	42.3383	-71.097	Boston	327	11	/images/id_1221_400_300.jpg
624	4.59833	0.523998	3.47531	0.445535	4.24994	0.432727	40.7538	-73.8888	New York City	197	0	/images/id_624_400_300.jpg
4181	3.33446	0.532661	3.18244	0.700236	4.18187	0.544535	40.7425	-73.9368	New York City	51	11	/images/id_4181_400_300.jpg
4180	6.81347	0.495211	6.3848	0.596201	8.09394	0.568297	40.711	-73.8493	New York City	343	5	/images/id_4180_400_300.jpg
4183	2.33146	0.558138	3.91229	0.81481	3.40019	0.533846	40.6792	-73.8316	New York City	27	9	/images/id_4183_400_300.jpg
4182	2.29341	0.507556	2.59556	0.728985	2.14603	0.629903	40.7538	-73.9192	New York City	346	10	/images/id_4182_400_300.jpg
4185	5.3209	0.52025	5.45784	0.781848	4.94318	0.557274	40.6196	-73.968	New York City	304	9	/images/id_4185_400_300.jpg
4184	5.03784	0.531186	4.24971	0.691572	5.09775	0.662078	40.6169	-73.9963	New York City	351	6	/images/id_4184_400_300.jpg
1229	3.21403	0.304303	3.4985	0.4174	3.7095	0.470212	42.3608	-71.1359	Boston	158	-5	/images/id_1229_400_300.jpg
4186	4.46181	0.609444	6.39042	0.652951	6.01019	0.703446	40.7036	-74.0073	New York City	32	7	/images/id_4186_400_300.jpg
4349	4.45869	0.554468	4.27621	0.83074	5.86172	0.579177	42.3671	-71.0944	Boston	355	2	/images/id_4349_400_300.jpg
4348	7.55945	0.517489	5.05666	0.762841	7.39864	0.584222	42.3373	-71.0504	Boston	351	2	/images/id_4348_400_300.jpg
4347	3.96145	0.590121	4.63125	0.77605	3.77532	0.58272	42.3367	-71.0837	Boston	0	2	/images/id_4347_400_300.jpg
4346	6.4003	0.585102	4.5876	0.713208	4.25922	0.581768	42.3759	-71.0583	Boston	0	-2	/images/id_4346_400_300.jpg
4345	4.452	0.477317	7.69864	0.780147	5.35087	0.604737	42.301	-71.0687	Boston	5	6	/images/id_4345_400_300.jpg
4344	7.05297	0.433194	4.5306	0.686326	7.22903	0.513257	42.3156	-71.0715	Boston	309	1	/images/id_4344_400_300.jpg
4343	6.51296	0.502117	6.3145	0.587143	6.51917	0.532644	42.3145	-71.0922	Boston	329	2	/images/id_4343_400_300.jpg
4342	4.23209	0.506855	5.37161	0.656731	4.90736	0.695668	42.329	-71.1199	Boston	9	1	/images/id_4342_400_300.jpg
4341	7.11696	0.559197	4.66811	0.724947	8.79701	0.586648	42.2942	-71.0687	Boston	278	-2	/images/id_4341_400_300.jpg
4340	8.35086	0.621166	4.52897	0.668607	7.245	0.57793	42.3354	-71.1407	Boston	85	-3	/images/id_4340_400_300.jpg
1996	4.29034	0.446107	5.45081	0.901095	5.78019	0.535073	48.3025	14.309	Linz	NULL	NULL	/images/id_1996_400_300.jpg
3197	4.06769	0.342501	4.76185	0.623539	3.66504	0.434852	47.8103	13.0598	Salzburg	NULL	NULL	/images/id_3197_400_300.jpg
2256	5.44689	0.401504	6.79332	0.55925	6.43912	0.488275	48.3018	14.2947	Linz	NULL	NULL	/images/id_2256_400_300.jpg
2	5.34255	0.449919	5.4111	0.705295	5.19499	0.508435	42.3638	-71.063	Boston	140	12	/images/id_2_400_300.jpg
4464	4.52618	0.569492	6.29233	0.807095	5.14752	0.645157	42.3393	-71.0904	Boston	26	3	/images/id_4464_400_300.jpg
1081	4.21053	0.499025	NULL	NULL	4.50479	0.509411	42.3606	-71.1384	Boston	77	2	/images/id_1081_400_300.jpg
4392	6.46937	0.494339	5.47338	0.593358	5.47496	0.602165	42.3326	-71.0326	Boston	323	2	/images/id_4392_400_300.jpg
3878	4.15875	0.573016	4.88333	0.804494	4.99221	0.572436	40.6287	-73.8994	New York City	2	2	/images/id_3878_400_300.jpg
3879	5.29011	0.553282	4.74893	0.73213	4.20617	0.670201	40.8851	-73.9024	New York City	19	5	/images/id_3879_400_300.jpg
3196	3.64966	0.393763	4.34379	0.801214	3.51481	0.350067	47.8098	13.0603	Salzburg	NULL	NULL	/images/id_3196_400_300.jpg
3870	5.17801	0.509434	3.02085	0.739681	4.21482	0.642317	40.6317	-73.9243	New York City	331	1	/images/id_3870_400_300.jpg
3871	6.40646	0.498831	4.83142	0.664684	7.0146	0.652795	40.5977	-73.9697	New York City	11	4	/images/id_3871_400_300.jpg
3872	3.00369	0.447533	3.60211	0.7652	1.31426	0.410798	40.6849	-73.9066	New York City	358	2	/images/id_3872_400_300.jpg
3873	6.66493	0.446621	4.87889	0.681364	4.85566	0.589805	40.7587	-73.907	New York City	8	5	/images/id_3873_400_300.jpg
3874	2.82673	0.480597	4.26085	0.688355	3.33682	0.577198	40.7034	-73.9201	New York City	6	7	/images/id_3874_400_300.jpg
3875	3.32014	0.481907	2.09797	0.739006	3.19161	0.639938	40.7246	-73.8861	New York City	67	3	/images/id_3875_400_300.jpg
3876	3.42057	0.543811	3.50777	0.752326	2.70707	0.508391	40.8678	-73.93	New York City	166	8	/images/id_3876_400_300.jpg
3877	3.70728	0.564747	3.6789	0.73203	5.01441	0.582108	40.6264	-73.9505	New York City	113	6	/images/id_3877_400_300.jpg
4395	6.60775	0.578525	5.40632	0.715407	6.13075	0.579201	42.3045	-71.1054	Boston	7	2	/images/id_4395_400_300.jpg
1286	5.12265	0.513065	4.79706	0.633108	5.46456	0.931565	42.375	-71.053	Boston	172	1	/images/id_1286_400_300.jpg
1714	3.23206	0.345529	3.71013	0.381283	3.59321	0.435314	48.2732	14.2688	Linz	NULL	NULL	/images/id_1714_400_300.jpg
2958	4.52419	0.452034	4.78759	0.68	4.01089	0.538127	47.7938	13.0728	Salzburg	NULL	NULL	/images/id_2958_400_300.jpg
11	5.35812	0.492531	4.69438	0.685363	5.76315	0.669379	42.3624	-71.0619	Boston	208	2	/images/id_11_400_300.jpg
10	4.97362	0.514601	3.67471	0.609095	5.40131	0.712157	42.3633	-71.0653	Boston	110	4	/images/id_10_400_300.jpg
13	6.08683	0.478509	6.16832	0.521514	4.64801	0.580916	40.7583	-73.9229	New York City	183	0	/images/id_13_400_300.jpg
12	3.68256	0.405171	3.96451	0.542961	3.80885	0.485502	42.3674	-71.0669	Boston	169	5	/images/id_12_400_300.jpg
15	2.56844	0.289441	3.14587	0.510137	2.67013	0.223715	42.3669	-71.0413	Boston	191	-1	/images/id_15_400_300.jpg
14	3.87368	0.462748	5.26542	0.816008	5.60568	0.543541	42.3521	-71.0524	Boston	194	3	/images/id_14_400_300.jpg
17	6.21442	0.422617	5.81919	0.552915	6.47105	0.478731	42.3621	-71.0525	Boston	191	1	/images/id_17_400_300.jpg
16	6.22434	0.404259	6.82344	0.374643	7.28238	0.300911	42.3589	-71.0581	Boston	93	8	/images/id_16_400_300.jpg
19	5.64959	0.490704	6.06458	0.620307	5.81891	0.515667	42.3588	-71.0575	Boston	250	4	/images/id_19_400_300.jpg
1922	5.51755	0.439168	4.01645	0.660939	5.76066	0.562855	48.2798	14.3095	Linz	NULL	NULL	/images/id_1922_400_300.jpg
1992	4.89694	0.441031	5.62045	0.674677	5.34698	0.539304	48.3023	14.3093	Linz	NULL	NULL	/images/id_1992_400_300.jpg
1923	6.02137	0.533528	3.55341	0.510604	5.47735	0.662107	48.2807	14.3108	Linz	NULL	NULL	/images/id_1923_400_300.jpg
1924	5.3666	0.620872	4.19526	0.59846	3.85265	0.492718	48.2795	14.311	Linz	NULL	NULL	/images/id_1924_400_300.jpg
3273	4.45061	0.539112	5.06967	0.494094	5.6344	0.487116	47.8115	13.0282	Salzburg	NULL	NULL	/images/id_3273_400_300.jpg
3904	3.80498	0.527288	2.88068	0.766023	4.15707	0.747255	40.6791	-73.8345	New York City	356	6	/images/id_3904_400_300.jpg
3905	4.67511	0.555556	2.35708	0.716112	1.78737	0.677608	40.8605	-73.9272	New York City	356	10	/images/id_3905_400_300.jpg
3906	3.96264	0.507435	6.54201	0.624221	2.66708	0.672545	40.7287	-73.9816	New York City	1	3	/images/id_3906_400_300.jpg
3907	4.25736	0.524064	4.9225	0.590556	3.29656	0.624429	40.6081	-74.0105	New York City	15	7	/images/id_3907_400_300.jpg
3900	5.48335	0.518307	3.75901	0.744917	4.00296	0.634828	40.6914	-73.8324	New York City	1	12	/images/id_3900_400_300.jpg
3901	5.10663	0.595244	5.26478	0.807291	5.58778	0.588453	40.6701	-73.9618	New York City	40	18	/images/id_3901_400_300.jpg
3902	4.29289	0.469475	3.32064	0.72608	3.564	0.568711	40.7388	-73.8816	New York City	34	9	/images/id_3902_400_300.jpg
3903	3.34731	0.543792	3.99265	0.774015	3.41925	0.66856	40.6662	-73.9496	New York City	288	10	/images/id_3903_400_300.jpg
1927	4.19125	0.487931	3.99602	0.519491	4.21791	0.502505	48.2807	14.3087	Linz	NULL	NULL	/images/id_1927_400_300.jpg
3908	4.77779	0.494171	6.25478	0.858074	2.78047	0.670522	40.635	-73.9499	New York City	356	5	/images/id_3908_400_300.jpg
3909	1.96821	0.393767	2.13761	0.555003	1.72976	0.363726	40.611	-73.9841	New York City	9	6	/images/id_3909_400_300.jpg
4761	5.15901	0.535862	2.96209	0.766204	4.06086	0.578503	42.3923	-71.0987	Boston	8	10	/images/id_4761_400_300.jpg
4760	6.97041	0.56954	5.14698	0.784657	6.9975	0.656421	42.3146	-71.0555	Boston	320	6	/images/id_4760_400_300.jpg
4763	7.10865	0.486551	5.12459	0.773131	7.11008	0.542336	42.3508	-71.1564	Boston	316	5	/images/id_4763_400_300.jpg
4762	7.04223	0.487363	6.14459	0.703382	6.17781	0.596269	42.3815	-71.1221	Boston	353	6	/images/id_4762_400_300.jpg
4765	2.86244	0.579367	4.6322	0.694903	2.5037	0.601337	42.3363	-71.0416	Boston	300	-4	/images/id_4765_400_300.jpg
4764	7.40729	0.532712	7.34659	0.708742	8.61751	0.536364	42.3577	-71.0719	Boston	45	9	/images/id_4764_400_300.jpg
4767	5.59872	0.581436	4.16098	0.657104	3.86012	0.490117	42.34	-71.1185	Boston	261	5	/images/id_4767_400_300.jpg
4766	4.89536	0.542037	5.37015	0.680741	4.29313	0.522158	42.3906	-71.1122	Boston	332	4	/images/id_4766_400_300.jpg
4769	5.51682	0.574585	6.23202	0.84998	4.16904	0.668017	42.373	-71.122	Boston	324	6	/images/id_4769_400_300.jpg
4768	7.48836	0.559416	6.69468	0.733532	7.79346	0.509749	42.2826	-71.0618	Boston	314	9	/images/id_4768_400_300.jpg
4167	5.60335	0.493875	6.18518	0.782644	7.12402	0.533903	40.8018	-73.9611	New York City	331	24	/images/id_4167_400_300.jpg
4166	2.02379	0.448619	5.46993	0.884464	1.43229	0.562901	40.6943	-73.9293	New York City	350	5	/images/id_4166_400_300.jpg
4165	5.26268	0.580181	4.34853	0.714114	8.11365	0.603544	40.7998	-73.9702	New York City	343	3	/images/id_4165_400_300.jpg
4164	1.68171	0.396593	2.20536	0.70324	1.90482	0.478822	40.7211	-73.9167	New York City	324	5	/images/id_4164_400_300.jpg
4163	4.7737	0.547467	3.49388	0.596338	3.77105	0.579863	40.8091	-73.9126	New York City	325	7	/images/id_4163_400_300.jpg
4162	0.465477	0.462276	1.97053	0.661715	1.62788	0.514609	40.7096	-73.9278	New York City	28	4	/images/id_4162_400_300.jpg
4161	2.81658	0.558493	2.65132	0.691255	3.12083	0.629382	40.6865	-73.9483	New York City	35	6	/images/id_4161_400_300.jpg
4160	4.72828	0.582902	5.32173	0.74843	2.87988	0.502034	40.7764	-73.9104	New York City	356	4	/images/id_4160_400_300.jpg
599	5.07032	0.446392	5.21712	0.657666	5.12472	0.496303	40.7229	-73.9461	New York City	237	3	/images/id_599_400_300.jpg
4268	3.34287	0.527078	3.23305	0.704131	2.26083	0.459576	40.6276	-73.9421	New York City	7	11	/images/id_4268_400_300.jpg
4169	6.8383	0.586365	6.41546	0.842061	5.83077	0.607309	40.7625	-73.9297	New York City	344	9	/images/id_4169_400_300.jpg
4168	5.55651	0.535846	4.13229	0.701676	4.14757	0.560507	40.7336	-73.8805	New York City	0	7	/images/id_4168_400_300.jpg
3090	6.06447	0.501291	6.07797	0.451028	5.98782	0.643589	47.7995	13.053	Salzburg	NULL	NULL	/images/id_3090_400_300.jpg
688	3.60839	0.363033	3.51048	0.60143	3.13905	0.304118	40.6151	-73.9047	New York City	176	-2	/images/id_688_400_300.jpg
201	5.33331	0.501712	5.01989	0.708982	5.09393	0.604505	40.7665	-73.9162	New York City	179	7	/images/id_201_400_300.jpg
200	6.35489	0.411503	4.96716	0.69846	5.66777	0.63174	40.7219	-73.8899	New York City	185	1	/images/id_200_400_300.jpg
202	5.19082	0.514602	2.77532	0.312032	4.93764	0.63136	40.7525	-73.8744	New York City	155	3	/images/id_202_400_300.jpg
3475	5.90664	0.598493	6.17267	0.843982	7.73245	0.5222	42.3495	-71.0746	Boston	15	14	/images/id_3475_400_300.jpg
209	5.77119	0.486741	4.48217	0.72213	5.8669	0.619341	40.7615	-73.9269	New York City	187	0	/images/id_209_400_300.jpg
3476	4.76472	0.557877	3.71482	0.808282	3.06191	0.510444	42.3707	-71.0615	Boston	9	16	/images/id_3476_400_300.jpg
1352	5.37521	0.455744	4.33648	0.610053	5.9697	0.522729	42.3815	-71.1221	Boston	173	6	/images/id_1352_400_300.jpg
3989	6.84415	0.551594	5.57086	0.715771	7.51951	0.618288	40.6832	-73.9312	New York City	313	5	/images/id_3989_400_300.jpg
831	4.18907	0.421114	3.79901	0.566318	3.53818	0.378111	40.6557	-73.9072	New York City	197	6	/images/id_831_400_300.jpg
4706	7.22762	0.548968	7.0519	0.624842	8.38351	0.584419	42.3629	-71.0553	Boston	357	0	/images/id_4706_400_300.jpg
836	4.69104	0.502111	6.97424	0.482312	4.15656	0.527731	40.7587	-73.9874	New York City	132	5	/images/id_836_400_300.jpg
2250	4.67527	0.528588	4.76757	0.931667	3.67958	0.461664	48.2992	14.2945	Linz	NULL	NULL	/images/id_2250_400_300.jpg
837	3.93313	0.386055	4.59901	0.768541	3.46275	0.365061	40.7457	-73.9134	New York City	146	11	/images/id_837_400_300.jpg
2239	5.04618	0.378559	6.2097	0.617028	5.83829	0.61917	48.3008	14.2992	Linz	NULL	NULL	/images/id_2239_400_300.jpg
2238	5.32047	0.507092	4.59959	0.613572	6.81434	0.291937	48.301	14.2982	Linz	NULL	NULL	/images/id_2238_400_300.jpg
3472	5.11189	0.576719	7.5415	0.66237	6.88816	0.673733	42.3638	-71.063	Boston	325	12	/images/id_3472_400_300.jpg
2231	5.48946	0.479981	5.70314	0.767966	5.4447	0.601916	48.2997	14.292	Linz	NULL	NULL	/images/id_2231_400_300.jpg
2230	4.85758	0.525403	5.66011	0.602071	5.1408	0.668044	48.2995	14.2917	Linz	NULL	NULL	/images/id_2230_400_300.jpg
2233	5.45423	0.436909	5.2988	0.832113	5.89732	0.533928	48.2982	14.2912	Linz	NULL	NULL	/images/id_2233_400_300.jpg
2232	5.85051	0.440216	5.99803	0.685813	5.98637	0.54764	48.2982	14.2912	Linz	NULL	NULL	/images/id_2232_400_300.jpg
2235	4.46126	0.402986	4.78225	0.731151	3.97361	0.488267	48.3003	14.2957	Linz	NULL	NULL	/images/id_2235_400_300.jpg
2234	4.94776	0.475827	6.89918	0.487909	6.31415	0.535694	48.3005	14.296	Linz	NULL	NULL	/images/id_2234_400_300.jpg
2237	5.58845	0.428615	4.62745	0.682109	5.5189	0.552331	48.301	14.2975	Linz	NULL	NULL	/images/id_2237_400_300.jpg
2236	5.34737	0.433746	6.6376	0.437791	5.66942	0.37503	48.3003	14.2957	Linz	NULL	NULL	/images/id_2236_400_300.jpg
229	4.80882	0.545817	4.77412	0.647193	4.028	0.576234	40.6402	-73.889	New York City	192	-2	/images/id_229_400_300.jpg
3498	0.797571	0.498667	4.08511	0.891814	1.44875	0.575192	40.699	-73.9288	New York City	19	0	/images/id_3498_400_300.jpg
3499	3.08541	0.475125	4.89436	0.679198	3.22265	0.51206	40.6998	-73.8873	New York City	43	3	/images/id_3499_400_300.jpg
3496	3.07512	0.639356	3.63974	0.684489	1.91347	0.520583	40.7618	-73.942	New York City	326	1	/images/id_3496_400_300.jpg
3497	3.59573	0.559597	4.20765	0.66924	3.83221	0.592404	40.6861	-73.8279	New York City	10	0	/images/id_3497_400_300.jpg
3494	2.85374	0.488824	3.16743	0.686921	1.95934	0.599676	40.676	-73.9872	New York City	4	0	/images/id_3494_400_300.jpg
4609	6.37515	0.536154	7.02644	0.631289	7.29129	0.597202	42.2984	-71.0848	Boston	179	2	/images/id_4609_400_300.jpg
3492	2.05945	0.472219	3.06598	0.591551	1.42382	0.552333	42.3782	-71.0866	Boston	14	12	/images/id_3492_400_300.jpg
3493	2.28528	0.575477	5.35974	0.799054	1.11	0.609008	40.7503	-73.9523	New York City	25	2	/images/id_3493_400_300.jpg
3490	7.28841	0.514205	4.36241	0.75193	6.57941	0.621326	42.3588	-71.0575	Boston	39	4	/images/id_3490_400_300.jpg
3491	1.33066	0.472389	5.87373	0.85497	1.31422	0.425663	42.3819	-71.0566	Boston	75	2	/images/id_3491_400_300.jpg
2095	5.34225	0.479702	5.0548	0.624067	5.76152	0.564732	48.3165	14.282	Linz	NULL	NULL	/images/id_2095_400_300.jpg
2094	4.87387	0.543264	4.71211	0.671188	3.91547	0.54446	48.3165	14.2822	Linz	NULL	NULL	/images/id_2094_400_300.jpg
4572	5.12307	0.551991	5.69177	0.772626	5.49255	0.663009	42.4034	-71.1075	Boston	225	2	/images/id_4572_400_300.jpg
4573	3.97112	0.511154	2.52849	0.70113	3.07347	0.554807	42.3188	-71.0917	Boston	205	6	/images/id_4573_400_300.jpg
2091	4.19266	0.397669	3.39647	0.425066	4.72979	0.546736	48.3173	14.2833	Linz	NULL	NULL	/images/id_2091_400_300.jpg
3659	4.50924	0.535617	5.4501	0.716617	2.49085	0.472289	40.8746	-73.9097	New York City	18	-1	/images/id_3659_400_300.jpg
4576	6.31222	0.495519	6.07847	0.862941	7.56057	0.610109	42.3028	-71.064	Boston	123	1	/images/id_4576_400_300.jpg
4607	3.10048	0.548406	2.72327	0.864887	3.29651	0.577923	42.3203	-71.1035	Boston	354	0	/images/id_4607_400_300.jpg
3654	3.05888	0.393314	2.46377	0.759425	2.04473	0.510067	40.6679	-73.8701	New York City	319	5	/images/id_3654_400_300.jpg
3655	7.13864	0.535743	4.35511	0.756318	6.96861	0.633891	40.7607	-73.8844	New York City	142	6	/images/id_3655_400_300.jpg
3656	8.01742	0.586641	7.24114	0.491019	8.56866	0.65099	40.7885	-73.9728	New York City	333	9	/images/id_3656_400_300.jpg
3657	7.30636	0.521491	5.30867	0.687359	6.55051	0.621936	40.7615	-73.9269	New York City	7	0	/images/id_3657_400_300.jpg
3650	7.07602	0.548548	3.13392	0.505071	7.9408	0.584135	40.7219	-73.8899	New York City	5	1	/images/id_3650_400_300.jpg
2098	4.65534	0.494713	4.74252	0.66793	5.61467	0.552667	48.3185	14.2825	Linz	NULL	NULL	/images/id_2098_400_300.jpg
3652	4.07524	0.549039	2.03587	0.575746	2.02767	0.497298	40.7525	-73.8744	New York City	335	3	/images/id_3652_400_300.jpg
3653	1.81199	0.490819	2.00723	0.656712	2.41931	0.428917	40.6898	-73.8432	New York City	274	7	/images/id_3653_400_300.jpg
4605	5.54493	0.587279	5.7932	0.70556	5.39603	0.581498	42.3106	-71.0836	Boston	43	-1	/images/id_4605_400_300.jpg
223	4.37414	0.429622	5.12263	0.78476	4.22627	0.606816	40.6867	-73.8675	New York City	219	2	/images/id_223_400_300.jpg
3953	3.79008	0.529524	3.05606	0.683173	2.52686	0.469455	40.7561	-73.9136	New York City	20	2	/images/id_3953_400_300.jpg
222	3.46017	0.394387	4.23694	0.518681	3.66496	0.452255	40.8025	-73.9088	New York City	240	2	/images/id_222_400_300.jpg
221	4.04122	0.446353	3.85739	0.542191	3.80248	0.467043	40.5996	-73.9476	New York City	207	5	/images/id_221_400_300.jpg
4601	3.34719	0.553719	3.64299	0.567291	2.53866	0.545464	42.2967	-71.0476	Boston	218	-2	/images/id_4601_400_300.jpg
598	4.71901	0.465072	4.28423	0.635545	4.75133	0.614498	40.8835	-73.906	New York City	144	4	/images/id_598_400_300.jpg
4888	4.43713	0.582581	4.98731	0.923337	3.38975	0.587958	42.3514	-71.144	Boston	96	3	/images/id_4888_400_300.jpg
4889	4.40145	0.52251	4.04845	0.815256	3.35422	0.54551	42.3575	-71.1062	Boston	348	4	/images/id_4889_400_300.jpg
4880	4.13255	0.518481	4.91939	0.708188	3.41737	0.571795	42.3251	-71.0593	Boston	2	5	/images/id_4880_400_300.jpg
4881	6.3066	0.476695	5.7192	0.782026	6.19333	0.62213	42.3736	-71.1038	Boston	234	-2	/images/id_4881_400_300.jpg
4882	6.70797	0.494326	5.7393	0.748396	6.67631	0.657388	42.3124	-71.0666	Boston	331	0	/images/id_4882_400_300.jpg
4883	3.18773	0.485031	2.69403	0.668835	3.28438	0.662373	42.3321	-71.0728	Boston	267	3	/images/id_4883_400_300.jpg
4884	6.80865	0.489207	6.55609	0.787303	7.01937	0.62348	42.3148	-71.1148	Boston	141	2	/images/id_4884_400_300.jpg
4885	4.55484	0.546195	4.34257	0.700364	6.40449	0.654372	42.3835	-71.0808	Boston	191	0	/images/id_4885_400_300.jpg
4886	2.64759	0.537919	2.05953	0.823897	1.26049	0.54761	42.3986	-71.1368	Boston	112	4	/images/id_4886_400_300.jpg
4887	1.54245	0.46465	1.62462	0.746304	0.653492	0.54755	42.3298	-71.072	Boston	155	-7	/images/id_4887_400_300.jpg
1829	4.44559	0.563398	3.78856	0.499532	4.48019	0.567311	48.275	14.301	Linz	NULL	NULL	/images/id_1829_400_300.jpg
4409	7.31796	0.435006	5.23945	0.861998	7.07869	0.518859	42.3041	-71.061	Boston	28	11	/images/id_4409_400_300.jpg
1825	5.5504	0.558663	5.38005	0.637576	5.75577	0.458436	48.2742	14.2983	Linz	NULL	NULL	/images/id_1825_400_300.jpg
1824	4.37915	0.453073	4.75338	0.808127	4.31227	0.528697	48.2738	14.2977	Linz	NULL	NULL	/images/id_1824_400_300.jpg
1827	5.92618	0.379928	6.98151	0.571306	5.66992	0.734326	48.2748	14.3003	Linz	NULL	NULL	/images/id_1827_400_300.jpg
1826	4.73855	0.46725	5.27606	0.631899	5.97278	0.518218	48.2745	14.2995	Linz	NULL	NULL	/images/id_1826_400_300.jpg
1821	4.07138	0.419974	3.88154	0.603955	3.42139	0.429787	48.2705	14.2928	Linz	NULL	NULL	/images/id_1821_400_300.jpg
1820	5.9817	0.477118	4.94941	0.711123	4.07361	0.546207	48.2705	14.2928	Linz	NULL	NULL	/images/id_1820_400_300.jpg
4402	3.18974	0.557875	6.57697	0.825887	2.24628	0.54429	42.3232	-71.0682	Boston	19	3	/images/id_4402_400_300.jpg
4403	3.41265	0.563728	4.24238	0.689345	4.91618	0.605337	42.3848	-71.1294	Boston	11	9	/images/id_4403_400_300.jpg
928	6.34956	0.394806	5.96964	0.707736	6.69946	0.40135	42.329	-71.1199	Boston	189	1	/images/id_928_400_300.jpg
929	6.06096	0.610364	5.07692	0.765043	5.99243	0.621615	42.3145	-71.0922	Boston	149	2	/images/id_929_400_300.jpg
2145	4.83947	0.479558	4.75089	0.708746	4.90479	0.516993	48.315	14.2693	Linz	NULL	NULL	/images/id_2145_400_300.jpg
2144	5.02776	0.47165	5.30776	0.719405	5.54999	0.615918	48.315	14.2693	Linz	NULL	NULL	/images/id_2144_400_300.jpg
2143	5.5564	0.487015	5.55569	0.723894	5.90404	0.357156	48.3143	14.272	Linz	NULL	NULL	/images/id_2143_400_300.jpg
2142	6.57101	0.409672	5.89482	0.766485	6.9126	0.326641	48.314	14.2732	Linz	NULL	NULL	/images/id_2142_400_300.jpg
2141	4.96064	0.41486	4.84388	0.786046	5.18333	0.540713	48.3153	14.2737	Linz	NULL	NULL	/images/id_2141_400_300.jpg
2140	6.42606	0.45628	5.10731	0.754065	5.85133	0.598317	48.3157	14.2742	Linz	NULL	NULL	/images/id_2140_400_300.jpg
920	5.67692	0.45621	5.47821	0.704491	5.82122	0.482473	42.3888	-71.1283	Boston	191	3	/images/id_920_400_300.jpg
921	6.36741	0.393906	6.70108	0.559332	5.26624	0.639786	42.3695	-71.1061	Boston	194	3	/images/id_921_400_300.jpg
922	5.85138	0.416299	4.85726	0.805924	5.60445	0.530225	42.316	-71.0988	Boston	171	3	/images/id_922_400_300.jpg
923	5.66264	0.439811	5.10766	0.616585	5.8098	0.507846	42.3764	-71.1357	Boston	15	0	/images/id_923_400_300.jpg
924	5.6978	0.507299	4.14559	0.66059	5.76788	0.450334	42.3456	-71.1467	Boston	194	4	/images/id_924_400_300.jpg
925	5.17876	0.512478	5.26112	0.614448	6.10939	0.540263	42.3848	-71.1278	Boston	203	0	/images/id_925_400_300.jpg
926	6.85907	0.459258	5.92484	0.698263	7.13933	0.377729	42.3354	-71.1407	Boston	265	-3	/images/id_926_400_300.jpg
2148	5.29019	0.528494	5.48067	0.691236	5.51351	0.573002	48.3152	14.2732	Linz	NULL	NULL	/images/id_2148_400_300.jpg
3950	5.43214	0.549459	3.41543	0.699806	4.15206	0.606838	40.6002	-73.9567	New York City	6	9	/images/id_3950_400_300.jpg
3276	5.1003	0.465803	3.5398	0.592873	5.43087	0.625055	47.8115	13.0295	Salzburg	NULL	NULL	/images/id_3276_400_300.jpg
3277	5.97337	0.604427	6.05488	0.634419	5.56513	0.598651	47.8115	13.0295	Salzburg	NULL	NULL	/images/id_3277_400_300.jpg
3274	4.79766	0.614209	4.23025	0.570419	4.59073	0.557997	47.8115	13.0282	Salzburg	NULL	NULL	/images/id_3274_400_300.jpg
3275	5.38194	0.472424	4.25634	0.67687	4.68246	0.402366	47.8115	13.0282	Salzburg	NULL	NULL	/images/id_3275_400_300.jpg
3272	5.63262	0.447718	5.81117	0.747536	6.49051	0.534755	47.8115	13.0282	Salzburg	NULL	NULL	/images/id_3272_400_300.jpg
1925	4.33504	0.480936	4.76501	0.725428	4.82636	0.607326	48.2792	14.3117	Linz	NULL	NULL	/images/id_1925_400_300.jpg
1926	5.46638	0.549768	4.64606	0.660901	5.2826	0.689264	48.2797	14.3097	Linz	NULL	NULL	/images/id_1926_400_300.jpg
3271	4.86037	0.441795	5.65567	0.712356	4.51514	0.493414	47.8117	13.0268	Salzburg	NULL	NULL	/images/id_3271_400_300.jpg
1928	5.33038	0.435366	3.73743	0.541024	4.68678	0.583962	48.2807	14.3087	Linz	NULL	NULL	/images/id_1928_400_300.jpg
1929	4.20284	0.403059	3.96052	0.554221	4.87734	0.545394	48.2807	14.3087	Linz	NULL	NULL	/images/id_1929_400_300.jpg
475	4.37704	0.543039	4.37274	0.604065	4.05509	0.406082	40.7326	-73.8922	New York City	196	7	/images/id_475_400_300.jpg
496	4.62689	0.455302	4.57417	0.618822	4.18082	0.517573	40.7476	-73.9013	New York City	218	5	/images/id_496_400_300.jpg
3278	4.26505	0.522104	2.86362	0.532319	5.22967	0.495437	47.8063	13.0328	Salzburg	NULL	NULL	/images/id_3278_400_300.jpg
3279	4.46763	0.579358	4.87861	0.649531	5.00805	0.708464	47.8052	13.032	Salzburg	NULL	NULL	/images/id_3279_400_300.jpg
3474	1.82217	0.439212	2.67733	0.652891	2.98162	0.542549	42.3438	-71.0423	Boston	1	0	/images/id_3474_400_300.jpg
833	3.41521	0.317828	4.01389	0.707489	3.36321	0.303747	40.6318	-73.885	New York City	198	7	/images/id_833_400_300.jpg
830	3.09308	0.298005	4.202	0.638168	4.15164	0.578433	40.65	-73.8318	New York City	190	4	/images/id_830_400_300.jpg
3477	4.59872	0.63338	5.54907	0.75652	5.14891	0.557878	42.3627	-71.0639	Boston	163	7	/images/id_3477_400_300.jpg
3470	4.6111	0.432952	5.41831	0.664412	4.21706	0.510088	47.8198	13.069	Salzburg	NULL	NULL	/images/id_3470_400_300.jpg
3471	3.73639	0.521328	3.57384	0.692265	3.12654	0.516876	42.3619	-71.0565	Boston	92	8	/images/id_3471_400_300.jpg
834	4.03379	0.419036	5.1177	0.701016	3.10123	0.365265	40.6074	-73.9785	New York City	192	6	/images/id_834_400_300.jpg
3473	4.07134	0.527591	2.6861	0.681725	4.79937	0.562191	42.3386	-71.0664	Boston	17	2	/images/id_3473_400_300.jpg
490	4.26305	0.415728	5.03411	0.820032	4.45806	0.571775	40.6081	-74.0105	New York City	195	7	/images/id_490_400_300.jpg
838	5.91739	0.468379	4.76357	0.587106	6.23183	0.476539	40.7146	-74.0072	New York City	165	5	/images/id_838_400_300.jpg
839	6.34761	0.427676	5.83653	0.565697	6.2105	0.499652	40.7306	-73.9571	New York City	220	11	/images/id_839_400_300.jpg
3478	2.83685	0.48661	3.51645	0.734932	2.6332	0.597474	42.3784	-71.0911	Boston	24	8	/images/id_3478_400_300.jpg
3479	5.56263	0.529097	5.44975	0.779827	6.05524	0.555313	42.3491	-71.043	Boston	75	6	/images/id_3479_400_300.jpg
491	4.61789	0.475906	5.78336	0.663608	4.79795	0.5162	40.635	-73.9499	New York City	176	5	/images/id_491_400_300.jpg
3	3.08477	0.179888	2.64783	0.324934	3.33748	0.315761	42.3386	-71.0664	Boston	197	2	/images/id_3_400_300.jpg
492	3.5178	0.317479	4.59475	0.591843	3.37548	0.416028	40.611	-73.9841	New York City	189	6	/images/id_492_400_300.jpg
2937	4.3401	0.503468	5.60631	0.826203	5.5316	0.547476	47.7938	13.0758	Salzburg	NULL	NULL	/images/id_2937_400_300.jpg
359	4.86182	0.463977	6.02594	0.684494	5.56474	0.554296	40.6989	-73.8466	New York City	282	10	/images/id_359_400_300.jpg
4223	3.70509	0.555139	3.41695	0.555673	4.45415	0.498019	40.7685	-73.8981	New York City	15	4	/images/id_4223_400_300.jpg
671	5.02252	0.530483	4.17248	0.732226	6.17569	0.580889	40.7183	-73.8379	New York City	69	4	/images/id_671_400_300.jpg
1986	4.51888	0.487303	4.46128	0.539107	3.94582	0.381908	48.2988	14.3125	Linz	NULL	NULL	/images/id_1986_400_300.jpg
3332	4.77565	0.614379	4.5595	0.585077	6.0356	0.544674	47.8033	13.0285	Salzburg	NULL	NULL	/images/id_3332_400_300.jpg
4681	6.36238	0.555511	7.4202	0.668836	7.99427	0.662178	42.3271	-71.1079	Boston	341	6	/images/id_4681_400_300.jpg
3319	5.05787	0.523662	4.62935	0.722835	5.20115	0.408324	47.7977	13.0228	Salzburg	NULL	NULL	/images/id_3319_400_300.jpg
3318	6.50164	0.449253	4.50228	0.635831	4.79304	0.581021	47.7972	13.0223	Salzburg	NULL	NULL	/images/id_3318_400_300.jpg
3311	4.20282	0.445257	4.64593	0.552148	4.16028	0.449355	47.7958	13.0088	Salzburg	NULL	NULL	/images/id_3311_400_300.jpg
3310	4.76642	0.502365	4.46634	0.773733	4.1064	0.526877	47.797	13.0065	Salzburg	NULL	NULL	/images/id_3310_400_300.jpg
3313	5.31792	0.378071	5.14312	0.686052	4.6711	0.474059	47.7933	13.0162	Salzburg	NULL	NULL	/images/id_3313_400_300.jpg
3312	4.54907	0.475473	5.47219	0.658525	3.98757	0.537938	47.7942	13.008	Salzburg	NULL	NULL	/images/id_3312_400_300.jpg
3315	4.13797	0.398415	4.22619	0.6749	4.55822	0.39433	47.7935	13.0187	Salzburg	NULL	NULL	/images/id_3315_400_300.jpg
3314	5.3111	0.49943	5.47627	0.731371	5.75085	0.702051	47.7935	13.0167	Salzburg	NULL	NULL	/images/id_3314_400_300.jpg
3317	5.39748	0.442865	6.28052	0.565297	5.4939	0.740866	47.7963	13.021	Salzburg	NULL	NULL	/images/id_3317_400_300.jpg
3316	4.78889	0.629152	4.58973	0.708498	3.85634	0.539203	47.7947	13.0187	Salzburg	NULL	NULL	/images/id_3316_400_300.jpg
784	4.31102	0.464497	3.98046	0.677406	3.52929	0.416425	40.7474	-73.9065	New York City	153	2	/images/id_784_400_300.jpg
785	3.46924	0.347851	4.01461	0.536541	3.02807	0.445178	40.6652	-73.957	New York City	233	12	/images/id_785_400_300.jpg
786	3.92717	0.436395	4.12597	0.632857	5.39524	0.530434	40.6807	-73.8905	New York City	218	10	/images/id_786_400_300.jpg
787	5.30954	0.463555	6.15629	0.489521	5.76629	0.605835	40.7495	-73.995	New York City	164	11	/images/id_787_400_300.jpg
780	5.79109	0.408651	5.85192	0.64641	5.57814	0.561844	40.7148	-73.8554	New York City	162	3	/images/id_780_400_300.jpg
781	3.05084	0.237787	4.48523	0.891895	2.93098	0.176921	40.7289	-73.9471	New York City	201	2	/images/id_781_400_300.jpg
782	6.09718	0.527365	5.81243	0.741816	6.86719	0.267831	40.678	-73.9703	New York City	149	1	/images/id_782_400_300.jpg
1729	5.39368	0.495985	3.40782	0.459714	5.05304	0.684197	48.2752	14.2793	Linz	NULL	NULL	/images/id_1729_400_300.jpg
1726	4.64832	0.463972	5.18445	0.700572	5.74206	0.620864	48.2743	14.277	Linz	NULL	NULL	/images/id_1726_400_300.jpg
1727	6.10688	0.448951	5.11923	0.743598	5.70641	0.604523	48.2713	14.2765	Linz	NULL	NULL	/images/id_1727_400_300.jpg
1724	6.26906	0.400276	4.51334	0.739649	5.70182	0.5048	48.2745	14.2772	Linz	NULL	NULL	/images/id_1724_400_300.jpg
1725	3.65828	0.354192	3.68729	0.650085	4.11558	0.606321	48.2743	14.277	Linz	NULL	NULL	/images/id_1725_400_300.jpg
1722	4.82073	0.516939	5.18557	0.759744	4.29565	0.59687	48.2752	14.2775	Linz	NULL	NULL	/images/id_1722_400_300.jpg
1723	6.09955	0.483937	6.01349	0.655695	6.14826	0.548586	48.2757	14.2762	Linz	NULL	NULL	/images/id_1723_400_300.jpg
1720	4.6205	0.596243	3.50571	0.450633	5.85959	0.561391	48.2748	14.2773	Linz	NULL	NULL	/images/id_1720_400_300.jpg
1721	4.98256	0.529294	4.90231	0.866055	5.66389	0.603839	48.275	14.2777	Linz	NULL	NULL	/images/id_1721_400_300.jpg
1790	5.03451	0.550217	4.61016	0.710856	4.43109	0.554234	48.2618	14.2897	Linz	NULL	NULL	/images/id_1790_400_300.jpg
1984	4.4429	0.492245	4.04287	0.51919	4.04423	0.420865	48.2975	14.3102	Linz	NULL	NULL	/images/id_1984_400_300.jpg
252	4.98923	0.579602	4.9767	0.770148	6.03952	0.671756	40.7448	-73.9872	New York City	182	4	/images/id_252_400_300.jpg
4878	6.42637	0.544208	4.10759	0.923207	5.56856	0.598119	42.3202	-71.0751	Boston	326	2	/images/id_4878_400_300.jpg
468	4.73552	0.509376	4.96979	0.718318	5.12313	0.506126	40.7219	-73.8466	New York City	86	5	/images/id_468_400_300.jpg
3005	5.50306	0.466823	5.53398	0.636626	6.3851	0.525433	47.8028	13.0113	Salzburg	NULL	NULL	/images/id_3005_400_300.jpg
3004	5.10798	0.55585	5.70159	0.829816	6.58751	0.47325	47.8037	13.009	Salzburg	NULL	NULL	/images/id_3004_400_300.jpg
3007	4.53218	0.455345	4.81944	0.696071	5.01924	0.648253	47.803	13.0113	Salzburg	NULL	NULL	/images/id_3007_400_300.jpg
63	5.86868	0.426401	4.03046	0.622565	6.19592	0.586615	40.6015	-73.9695	New York City	199	4	/images/id_63_400_300.jpg
64	6.03358	0.510495	6.62222	0.493265	7.17663	0.394501	40.7134	-73.8377	New York City	323	-2	/images/id_64_400_300.jpg
65	3.36057	0.311478	3.09826	0.144586	2.98522	0.35575	40.6683	-73.8998	New York City	196	-2	/images/id_65_400_300.jpg
66	4.38005	0.486451	5.89864	0.705062	5.31829	0.675582	40.8002	-73.9375	New York City	151	0	/images/id_66_400_300.jpg
3002	5.46723	0.431336	5.28909	0.69306	4.42626	0.405183	47.8042	13.014	Salzburg	NULL	NULL	/images/id_3002_400_300.jpg
68	4.10911	0.469758	4.21916	0.695601	4.69877	0.682823	40.6384	-74.022	New York City	162	0	/images/id_68_400_300.jpg
69	5.91946	0.437583	3.81975	0.709392	4.90941	0.598123	40.7382	-73.8734	New York City	98	2	/images/id_69_400_300.jpg
3009	5.04792	0.439478	5.44547	0.819953	7.37288	0.221594	47.8027	13.014	Salzburg	NULL	NULL	/images/id_3009_400_300.jpg
3008	5.13074	0.425017	4.06122	0.497969	4.29023	0.441601	47.803	13.0133	Salzburg	NULL	NULL	/images/id_3008_400_300.jpg
407	5.38455	0.559017	4.20731	0.549606	4.69111	0.669338	40.6176	-74.0391	New York City	309	5	/images/id_407_400_300.jpg
406	3.44415	0.394178	3.37477	0.356754	2.83974	0.199611	40.7686	-73.9288	New York City	239	4	/images/id_406_400_300.jpg
405	6.27902	0.367246	6.17201	0.767741	5.1438	0.576966	40.7474	-73.982	New York City	151	9	/images/id_405_400_300.jpg
1038	5.13637	0.536492	4.58511	0.779609	6.03396	0.582069	42.291	-71.0406	Boston	164	2	/images/id_1038_400_300.jpg
1039	5.58368	0.544186	6.38854	0.596814	6.4512	0.471315	42.3417	-71.0879	Boston	37	9	/images/id_1039_400_300.jpg
508	3.35692	0.286731	3.24884	0.31412	3.25707	0.404319	40.6668	-73.9233	New York City	251	2	/images/id_508_400_300.jpg
509	5.75872	0.438309	4.46839	0.505218	5.44026	0.573275	40.8037	-73.9604	New York City	175	2	/images/id_509_400_300.jpg
1032	5.48813	0.407604	5.46566	0.824046	6.48912	0.489816	42.3498	-71.0907	Boston	55	6	/images/id_1032_400_300.jpg
403	4.79116	0.498036	3.86087	0.501142	4.31245	0.468372	40.7502	-73.8939	New York City	203	9	/images/id_403_400_300.jpg
250	4.49565	0.481201	5.10345	0.918156	4.75589	0.593166	40.6883	-74.0185	New York City	176	-7	/images/id_250_400_300.jpg
1031	4.63161	0.463182	4.05983	0.646107	5.30819	0.573373	42.3784	-71.123	Boston	215	2	/images/id_1031_400_300.jpg
1036	6.1554	0.468795	5.53185	0.699357	5.60595	0.51821	42.3771	-71.063	Boston	182	1	/images/id_1036_400_300.jpg
1037	6.19712	0.49313	5.28265	0.668198	5.43163	0.469759	42.2856	-71.0521	Boston	197	0	/images/id_1037_400_300.jpg
1034	5.82235	0.519452	6.73539	0.643612	6.074	0.469644	42.3809	-71.0665	Boston	160	8	/images/id_1034_400_300.jpg
501	5.88643	0.517786	4.55992	0.759682	5.89157	0.729059	40.742	-73.9964	New York City	92	12	/images/id_501_400_300.jpg
1212	6.70019	0.356664	5.60226	0.742866	6.20641	0.446147	42.378	-71.1118	Boston	218	1	/images/id_1212_400_300.jpg
1213	4.54072	0.534812	4.57993	0.79822	5.07553	0.776017	42.3657	-71.1142	Boston	185	-8	/images/id_1213_400_300.jpg
1210	4.31354	0.566369	4.55358	0.571843	4.72294	0.499971	42.3426	-71.146	Boston	206	5	/images/id_1210_400_300.jpg
1211	6.32716	0.512913	4.4825	0.671883	6.1136	0.503987	42.3684	-71.0987	Boston	163	-1	/images/id_1211_400_300.jpg
1216	5.33743	0.516611	4.64408	0.642109	4.95469	0.625025	42.3018	-71.0756	Boston	290	2	/images/id_1216_400_300.jpg
1217	5.62471	0.40202	6.92378	0.628692	6.05687	0.499573	42.3305	-71.0352	Boston	214	1	/images/id_1217_400_300.jpg
1214	5.47264	0.585835	4.09581	0.645226	5.36681	0.715111	42.3349	-71.0933	Boston	195	1	/images/id_1214_400_300.jpg
1215	5.80651	0.521528	6.47071	0.396051	5.15424	0.602032	42.3882	-71.1017	Boston	169	2	/images/id_1215_400_300.jpg
638	3.92901	0.376454	5.52978	0.689822	3.65884	0.384604	40.7512	-73.8602	New York City	205	5	/images/id_638_400_300.jpg
639	5.90272	0.496273	5.32019	0.950414	5.5885	0.526733	40.6289	-74.0336	New York City	152	6	/images/id_639_400_300.jpg
1218	4.83393	0.475388	5.84828	0.679657	4.98724	0.570152	42.3727	-71.1258	Boston	152	2	/images/id_1218_400_300.jpg
1219	4.24271	0.411419	4.59871	0.800274	4.67786	0.508981	42.3686	-71.0805	Boston	178	0	/images/id_1219_400_300.jpg
4920	6.15278	0.510484	5.29155	0.760245	7.78981	0.559723	48.2715	14.2787	Linz	NULL	NULL	/images/id_4920_400_300.jpg
4378	5.0349	0.573634	5.57038	0.712847	4.9371	0.6661	42.3231	-71.088	Boston	352	2	/images/id_4378_400_300.jpg
4379	4.40128	0.608419	3.33497	0.657614	5.90477	0.68213	42.3512	-71.1158	Boston	224	5	/images/id_4379_400_300.jpg
1243	5.21678	0.380312	5.44812	0.666786	5.78247	0.468351	42.2883	-71.0682	Boston	332	-1	/images/id_1243_400_300.jpg
4372	4.4342	0.451615	3.27319	0.620107	4.51666	0.634099	42.3615	-71.0863	Boston	322	9	/images/id_4372_400_300.jpg
4373	7.12937	0.636311	6.71395	0.698361	8.02219	0.555515	42.345	-71.1113	Boston	30	3	/images/id_4373_400_300.jpg
4370	1.68609	0.486004	4.00034	0.855054	3.16052	0.590003	42.3565	-71.1506	Boston	250	8	/images/id_4370_400_300.jpg
4371	6.83464	0.531815	5.45656	0.772363	6.18236	0.543472	42.3752	-71.1353	Boston	31	-1	/images/id_4371_400_300.jpg
4376	3.63545	0.497206	5.46286	0.720736	5.01351	0.689335	42.3955	-71.0278	Boston	11	7	/images/id_4376_400_300.jpg
4377	2.86587	0.461815	3.97263	0.713164	2.67047	0.515315	42.3967	-71.0257	Boston	104	4	/images/id_4377_400_300.jpg
4374	3.44231	0.408353	2.37247	0.601841	1.14497	0.496821	42.3313	-71.0707	Boston	16	9	/images/id_4374_400_300.jpg
4375	2.67704	0.513877	3.38718	0.755821	4.54554	0.663459	42.3531	-71.0833	Boston	116	14	/images/id_4375_400_300.jpg
1728	5.10957	0.501942	4.61151	0.575574	5.36526	0.492689	48.2752	14.2793	Linz	NULL	NULL	/images/id_1728_400_300.jpg
1106	5.0746	0.505657	5.94414	0.647071	5.77254	0.570035	42.3322	-71.0482	Boston	215	2	/images/id_1106_400_300.jpg
1455	6.33104	0.438979	4.72394	0.683393	6.17598	0.53222	42.3283	-71.0786	Boston	336	7	/images/id_1455_400_300.jpg
1104	5.89292	0.438808	5.13716	0.606016	5.62016	0.575118	42.2963	-71.0609	Boston	221	1	/images/id_1104_400_300.jpg
1105	6.48929	0.399066	6.72685	0.545588	7.04478	0.352276	42.2946	-71.0637	Boston	225	1	/images/id_1105_400_300.jpg
1102	5.37422	0.533511	4.84933	0.597178	4.50844	0.543363	42.3638	-71.0868	Boston	95	9	/images/id_1102_400_300.jpg
1451	5.6394	0.514502	6.12278	0.574098	5.48872	0.532854	42.3313	-71.1193	Boston	216	12	/images/id_1451_400_300.jpg
1100	4.9082	0.461591	3.70053	0.485052	4.78404	0.572607	42.341	-71.1214	Boston	141	-3	/images/id_1100_400_300.jpg
1101	7.05876	0.316081	6.81747	0.465711	6.90452	0.246748	42.3772	-71.1401	Boston	127	2	/images/id_1101_400_300.jpg
4457	7.56232	0.50884	6.2107	0.61775	6.78819	0.581612	42.371	-71.1142	Boston	267	7	/images/id_4457_400_300.jpg
408	3.35373	0.318493	5.11933	0.669799	3.1149	0.29034	40.8178	-73.9301	New York City	141	3	/images/id_408_400_300.jpg
1458	4.62094	0.524184	4.91547	0.73792	4.70758	0.492444	42.385	-71.1315	Boston	185	11	/images/id_1458_400_300.jpg
1459	4.08453	0.385113	5.96286	0.620851	3.93576	0.417752	42.3577	-71.1065	Boston	117	7	/images/id_1459_400_300.jpg
1108	3.2507	0.312934	3.79736	0.543179	4.288	0.517659	42.2957	-71.0895	Boston	92	0	/images/id_1108_400_300.jpg
4830	3.9624	0.495245	3.16181	0.744127	3.77638	0.595301	42.3849	-71.0805	Boston	342	15	/images/id_4830_400_300.jpg
4080	2.70849	0.516285	3.73354	0.638923	2.93253	0.520092	40.5777	-73.9644	New York City	300	1	/images/id_4080_400_300.jpg
4081	7.11529	0.493978	5.52818	0.705172	7.07267	0.506192	40.7176	-73.8589	New York City	36	4	/images/id_4081_400_300.jpg
4082	5.79623	0.503998	7.89755	0.72798	5.58645	0.613968	40.8213	-73.9505	New York City	343	8	/images/id_4082_400_300.jpg
3868	6.2018	0.543428	5.95925	0.888734	6.74906	0.576202	40.7642	-73.9747	New York City	332	8	/images/id_3868_400_300.jpg
4084	1.43757	0.429565	5.22644	0.859124	1.32325	0.443386	40.725	-73.9338	New York City	26	5	/images/id_4084_400_300.jpg
4085	2.77095	0.534323	2.03782	0.880709	3.39579	0.60532	40.67	-73.8807	New York City	39	4	/images/id_4085_400_300.jpg
4086	1.82118	0.50676	3.7965	0.62818	2.79674	0.395691	40.7183	-73.8379	New York City	249	11	/images/id_4086_400_300.jpg
4087	4.65115	0.51715	4.08397	0.813653	5.38245	0.5788	40.7535	-73.9966	New York City	332	8	/images/id_4087_400_300.jpg
4088	5.21829	0.492037	4.53028	0.756208	5.37583	0.721129	40.7228	-73.9978	New York City	350	6	/images/id_4088_400_300.jpg
788	5.72718	0.502896	5.96636	0.627362	4.95615	0.629058	40.7204	-73.9544	New York City	104	0	/images/id_788_400_300.jpg
3861	0.829224	0.558469	4.62691	0.724512	1.5349	0.44403	40.7511	-73.9418	New York City	341	2	/images/id_3861_400_300.jpg
3860	6.55076	0.57272	5.56139	0.752421	5.94075	0.665268	40.8222	-73.9405	New York City	329	6	/images/id_3860_400_300.jpg
3867	5.61339	0.49776	5.15166	0.702294	5.54654	0.704103	40.6493	-73.9311	New York City	18	4	/images/id_3867_400_300.jpg
3866	4.44888	0.578627	3.55879	0.691007	4.39456	0.549923	40.749	-73.9495	New York City	346	5	/images/id_3866_400_300.jpg
3865	4.00852	0.560113	3.54382	0.742608	4.07939	0.582847	40.6658	-73.9615	New York City	13	6	/images/id_3865_400_300.jpg
789	4.89103	0.469452	4.18095	0.568072	3.6338	0.391885	40.6544	-73.9778	New York City	185	5	/images/id_789_400_300.jpg
3737	4.42852	0.464565	4.35559	0.680282	3.29498	0.46933	40.7443	-73.8823	New York City	334	1	/images/id_3737_400_300.jpg
322	6.3611	0.431774	5.98469	0.613569	5.99258	0.618032	40.6761	-73.9658	New York City	142	1	/images/id_322_400_300.jpg
3837	3.04532	0.425345	2.16577	0.510853	2.33647	0.409581	40.6106	-73.9821	New York City	12	2	/images/id_3837_400_300.jpg
2245	4.34254	0.546123	3.2887	0.418506	4.0169	0.468221	48.3017	14.3002	Linz	NULL	NULL	/images/id_2245_400_300.jpg
3736	4.5129	0.534474	3.13668	0.717369	4.07434	0.674688	40.741	-73.8879	New York City	284	1	/images/id_3736_400_300.jpg
467	4.72917	0.545356	4.51165	0.519553	4.6765	0.627736	40.7585	-73.8983	New York City	193	10	/images/id_467_400_300.jpg
4833	6.31233	0.500095	4.62332	0.734586	6.02768	0.654407	42.3058	-71.0599	Boston	31	-3	/images/id_4833_400_300.jpg
4458	4.74617	0.525557	4.02522	0.752231	4.47948	0.572589	42.3998	-71.1033	Boston	355	5	/images/id_4458_400_300.jpg
1890	3.94274	0.271411	4.28905	0.673845	4.14964	0.524571	48.2667	14.3082	Linz	NULL	NULL	/images/id_1890_400_300.jpg
1891	5.28128	0.497762	3.67164	0.51239	4.66795	0.505599	48.268	14.307	Linz	NULL	NULL	/images/id_1891_400_300.jpg
3731	7.12971	0.556335	4.51572	0.673335	6.41363	0.626984	40.7119	-73.8553	New York City	350	0	/images/id_3731_400_300.jpg
4832	6.77664	0.598894	6.41333	0.779017	7.11958	0.677985	42.3905	-71.0992	Boston	344	5	/images/id_4832_400_300.jpg
4903	5.40036	0.561962	4.84377	0.657057	7.45187	0.588564	42.2986	-71.0699	Boston	30	3	/images/id_4903_400_300.jpg
3917	2.46138	0.54244	3.77747	0.599171	2.73313	0.46349	40.6742	-73.9538	New York City	339	7	/images/id_3917_400_300.jpg
3916	4.04779	0.492615	3.49339	0.74412	3.79356	0.506535	40.6275	-73.9152	New York City	338	8	/images/id_3916_400_300.jpg
3915	3.71893	0.565175	3.61825	0.571924	3.70783	0.546616	40.6142	-73.9438	New York City	359	8	/images/id_3915_400_300.jpg
3914	2.90413	0.497664	5.63656	0.797645	2.80692	0.540858	40.6712	-73.9337	New York City	23	8	/images/id_3914_400_300.jpg
3913	3.671	0.517812	3.22627	0.896453	2.43567	0.443005	40.7476	-73.9013	New York City	38	5	/images/id_3913_400_300.jpg
3912	6.02023	0.519847	3.07401	0.6778	6.25328	0.716512	40.6613	-73.8433	New York City	325	0	/images/id_3912_400_300.jpg
3911	5.46834	0.564093	3.43521	0.714359	5.35777	0.678245	40.6088	-74.011	New York City	13	6	/images/id_3911_400_300.jpg
3910	6.41186	0.605983	4.16247	0.69622	6.13662	0.576868	40.6197	-73.9504	New York City	314	1	/images/id_3910_400_300.jpg
3147	4.42581	0.494426	5.54456	0.642091	4.14361	0.397182	47.8207	13.0533	Salzburg	NULL	NULL	/images/id_3147_400_300.jpg
2134	5.3939	0.399495	5.67312	0.646112	5.81879	0.394606	48.3163	14.2733	Linz	NULL	NULL	/images/id_2134_400_300.jpg
3919	2.30246	0.595032	3.40616	0.723195	2.55896	0.629643	40.5799	-73.9696	New York City	100	13	/images/id_3919_400_300.jpg
3918	5.41898	0.52763	5.34098	0.81502	7.47405	0.489644	40.742	-73.9964	New York City	272	12	/images/id_3918_400_300.jpg
2135	5.2829	0.430743	5.20195	0.801883	5.80607	0.493908	48.317	14.2717	Linz	NULL	NULL	/images/id_2135_400_300.jpg
4798	5.20635	0.539908	7.14541	0.692188	5.24566	0.592386	42.3804	-71.0323	Boston	19	15	/images/id_4798_400_300.jpg
4799	7.82285	0.516186	4.53443	0.843292	7.21972	0.637613	42.3536	-71.0473	Boston	353	17	/images/id_4799_400_300.jpg
1636	4.61781	0.482094	4.1598	0.678595	5.94289	0.571059	48.2938	14.2798	Linz	NULL	NULL	/images/id_1636_400_300.jpg
4794	4.54879	0.618019	3.45414	0.702068	3.7442	0.494363	42.3973	-71.1061	Boston	344	5	/images/id_4794_400_300.jpg
4795	1.90916	0.438694	2.84461	0.854316	2.5599	0.68448	42.3925	-71.0266	Boston	328	8	/images/id_4795_400_300.jpg
4796	4.21954	0.514519	4.89676	0.808648	4.84136	0.603259	42.3198	-71.0702	Boston	15	9	/images/id_4796_400_300.jpg
4797	7.33702	0.499887	5.04195	0.691311	6.58033	0.556159	42.2821	-71.0626	Boston	303	1	/images/id_4797_400_300.jpg
4790	2.8676	0.51992	3.7892	0.729951	4.40446	0.664058	42.3638	-71.1229	Boston	60	5	/images/id_4790_400_300.jpg
4791	4.57309	0.508241	3.97521	0.726929	5.02283	0.62036	42.297	-71.0816	Boston	31	7	/images/id_4791_400_300.jpg
4792	0.872134	0.478664	1.84713	0.706489	0.767843	0.568141	42.3359	-71.0552	Boston	343	8	/images/id_4792_400_300.jpg
4793	5.01467	0.507467	6.87896	0.737265	5.8976	0.610602	42.2891	-71.0766	Boston	33	10	/images/id_4793_400_300.jpg
4152	2.18745	0.476455	1.47284	0.693722	2.07834	0.471045	40.5946	-73.9913	New York City	354	3	/images/id_4152_400_300.jpg
4153	5.91737	0.478319	5.3686	0.714306	3.9735	0.672718	40.706	-73.8281	New York City	332	9	/images/id_4153_400_300.jpg
4150	6.25863	0.575977	6.76924	0.781115	5.15133	0.62851	40.7614	-73.9663	New York City	333	1	/images/id_4150_400_300.jpg
4151	2.58577	0.442645	2.25514	0.705225	1.99139	0.495793	40.6653	-73.8952	New York City	24	-2	/images/id_4151_400_300.jpg
4156	4.85065	0.559935	2.83809	0.775333	5.11721	0.663593	40.7385	-73.9225	New York City	329	3	/images/id_4156_400_300.jpg
4157	3.00204	0.517735	4.0162	0.851396	2.11538	0.548615	40.7145	-73.9374	New York City	332	-1	/images/id_4157_400_300.jpg
4154	1.78613	0.564197	1.55878	0.889267	1.94563	0.510316	40.6586	-73.895	New York City	15	8	/images/id_4154_400_300.jpg
4155	2.96544	0.478913	3.44486	0.487855	2.41446	0.595892	40.6783	-73.9996	New York City	335	4	/images/id_4155_400_300.jpg
4158	4.08773	0.561454	4.51814	0.786221	4.27858	0.640551	40.7622	-73.8828	New York City	36	-1	/images/id_4158_400_300.jpg
4159	3.69132	0.50841	4.53805	0.785839	3.82547	0.608432	40.7079	-73.9599	New York City	342	10	/images/id_4159_400_300.jpg
4699	7.52156	0.672048	3.45937	0.776224	7.90741	0.596521	42.3468	-71.1298	Boston	7	1	/images/id_4699_400_300.jpg
4834	5.27031	0.628154	5.44619	0.731293	5.6032	0.586288	42.3233	-71.0746	Boston	358	3	/images/id_4834_400_300.jpg
4929	5.52595	0.544145	5.62245	0.622457	6.87711	0.590242	48.2925	14.2913	Linz	NULL	NULL	/images/id_4929_400_300.jpg
4034	1.08827	0.468864	2.3146	0.526847	1.38537	0.520145	40.6753	-73.8948	New York City	14	4	/images/id_4034_400_300.jpg
216	4.91881	0.571025	5.68026	0.812563	5.02179	0.655088	40.6255	-73.9869	New York City	282	-2	/images/id_216_400_300.jpg
217	4.79563	0.492624	4.15666	0.638562	5.11099	0.571381	40.6688	-73.9889	New York City	150	0	/images/id_217_400_300.jpg
214	3.22291	0.356166	4.37659	0.650258	2.80105	0.254602	40.6637	-73.8761	New York City	189	0	/images/id_214_400_300.jpg
215	5.822	0.362486	3.75535	0.585221	5.64234	0.532588	40.6168	-73.904	New York City	173	0	/images/id_215_400_300.jpg
212	3.72242	0.451848	NULL	NULL	3.369	0.413282	40.6616	-73.8971	New York City	141	4	/images/id_212_400_300.jpg
213	5.63734	0.456818	5.8884	0.535679	4.93003	0.646232	40.8766	-73.9095	New York City	335	7	/images/id_213_400_300.jpg
210	6.03867	0.451854	5.96611	0.792622	6.10547	0.545953	40.7658	-73.9807	New York City	274	7	/images/id_210_400_300.jpg
211	3.57661	0.460781	5.25422	0.792956	3.93168	0.524093	40.8746	-73.9097	New York City	198	-1	/images/id_211_400_300.jpg
1186	5.79066	0.587764	6.47992	0.629452	5.43843	0.500163	42.3103	-71.0702	Boston	183	1	/images/id_1186_400_300.jpg
218	5.37422	0.459372	5.74777	0.703699	5.29677	0.61325	40.7747	-73.9065	New York City	201	0	/images/id_218_400_300.jpg
219	3.75531	0.374074	3.88803	0.711376	3.44314	0.382394	40.6686	-73.9046	New York City	152	10	/images/id_219_400_300.jpg
578	4.13419	0.384578	3.93551	0.60103	3.99855	0.460812	40.6482	-73.9607	New York City	201	8	/images/id_578_400_300.jpg
4837	3.3798	0.539787	3.62127	0.630918	5.17738	0.5801	42.3764	-71.0368	Boston	19	7	/images/id_4837_400_300.jpg
956	3.84362	0.405232	4.37959	0.686075	3.35532	0.323739	42.3565	-71.1506	Boston	76	1	/images/id_956_400_300.jpg
4	5.9154	0.4751	5.78167	0.69913	6.78631	0.394225	42.3495	-71.0746	Boston	190	8	/images/id_4_400_300.jpg
324	6.26726	0.427501	4.25866	0.68458	5.41913	0.539475	40.6149	-73.9296	New York City	171	1	/images/id_324_400_300.jpg
3097	5.86897	0.481666	5.66322	0.588503	6.47731	0.396795	47.802	13.0438	Salzburg	NULL	NULL	/images/id_3097_400_300.jpg
3489	5.26675	0.551733	4.66148	0.747711	6.85538	0.574837	42.3636	-71.0666	Boston	197	9	/images/id_3489_400_300.jpg
3488	7.21693	0.514679	6.61997	0.854358	6.87799	0.54399	42.3621	-71.0525	Boston	7	1	/images/id_3488_400_300.jpg
981	5.59058	0.507352	6.23325	0.510677	5.91024	0.51497	42.3045	-71.1054	Boston	177	2	/images/id_981_400_300.jpg
1252	3.6926	0.414421	3.54581	0.582044	3.41289	0.43348	42.4042	-71.1395	Boston	207	1	/images/id_1252_400_300.jpg
3182	6.5748	0.444637	5.44587	0.780931	5.92461	0.517613	47.807	13.0525	Salzburg	NULL	NULL	/images/id_3182_400_300.jpg
3481	5.63011	0.48791	5.66411	0.722756	6.59641	0.59677	42.3633	-71.0653	Boston	261	3	/images/id_3481_400_300.jpg
3480	2.80211	0.45634	2.34161	0.775143	2.56588	0.666851	42.355	-71.0773	Boston	222	9	/images/id_3480_400_300.jpg
3483	7.68478	0.57291	7.21339	0.843756	8.88439	0.652408	42.3674	-71.0669	Boston	22	3	/images/id_3483_400_300.jpg
3482	4.33327	0.568567	3.8702	0.74604	5.42929	0.647642	42.3624	-71.0619	Boston	28	2	/images/id_3482_400_300.jpg
3485	3.55412	0.527733	5.0145	0.834457	5.34292	0.571672	42.3521	-71.0524	Boston	355	10	/images/id_3485_400_300.jpg
3484	7.53337	0.515003	4.99771	0.934862	6.19084	0.683952	40.7583	-73.9229	New York City	3	0	/images/id_3484_400_300.jpg
3487	6.86942	0.470501	6.77477	0.676241	7.45989	0.614211	42.3589	-71.0581	Boston	259	8	/images/id_3487_400_300.jpg
3486	2.01244	0.411898	3.02303	0.640631	1.83896	0.368341	42.3669	-71.0413	Boston	350	0	/images/id_3486_400_300.jpg
4563	5.6285	0.522248	5.27296	0.908887	5.47132	0.641258	42.3354	-71.0709	Boston	13	6	/images/id_4563_400_300.jpg
4562	2.84949	0.553347	4.01307	0.78959	3.7013	0.552512	42.3763	-71.0668	Boston	4	0	/images/id_4562_400_300.jpg
4561	4.79729	0.556802	4.01467	0.783027	4.44544	0.607554	42.3512	-71.1444	Boston	285	-1	/images/id_4561_400_300.jpg
4560	6.74601	0.495916	5.27754	0.774724	8.10866	0.636253	42.347	-71.1263	Boston	324	-2	/images/id_4560_400_300.jpg
4567	5.31442	0.544897	6.10662	0.663342	5.22343	0.618636	42.3827	-71.1273	Boston	168	3	/images/id_4567_400_300.jpg
4566	7.08368	0.46323	6.20595	0.790103	6.91368	0.496398	42.3526	-71.1281	Boston	324	4	/images/id_4566_400_300.jpg
4565	5.56395	0.592565	5.67561	0.791568	4.90045	0.527094	42.3884	-71.0329	Boston	336	6	/images/id_4565_400_300.jpg
4564	6.06548	0.63196	4.52777	0.750001	6.10112	0.596804	42.3452	-71.0744	Boston	295	0	/images/id_4564_400_300.jpg
3647	3.72191	0.541137	3.18081	0.818039	3.07192	0.565815	40.8259	-73.9373	New York City	322	5	/images/id_3647_400_300.jpg
3646	4.96828	0.604217	7.36784	0.691855	5.08451	0.590131	40.6357	-73.9886	New York City	164	11	/images/id_3646_400_300.jpg
4569	2.00429	0.444786	3.51944	0.67803	0.895672	0.524853	42.385	-71.0758	Boston	236	-2	/images/id_4569_400_300.jpg
4568	5.47595	0.515522	5.63932	0.682287	4.71123	0.546773	42.3437	-71.1492	Boston	336	3	/images/id_4568_400_300.jpg
3643	4.64381	0.53116	3.09377	0.687128	3.69806	0.587653	40.6439	-73.9386	New York City	33	3	/images/id_3643_400_300.jpg
3642	6.1695	0.537242	5.65558	0.836005	6.71256	0.493732	40.6188	-74.0171	New York City	104	2	/images/id_3642_400_300.jpg
3641	1.32484	0.484481	1.12391	0.636657	0.887312	0.470328	40.6696	-73.9001	New York City	136	2	/images/id_3641_400_300.jpg
3640	2.07551	0.493503	2.3136	0.671159	2.11454	0.354482	40.7236	-73.8687	New York City	165	3	/images/id_3640_400_300.jpg
60	3.96087	0.46467	3.15135	0.357788	3.56772	0.384733	40.6994	-73.9471	New York City	200	0	/images/id_60_400_300.jpg
3183	4.96821	0.58019	5.88939	0.583968	4.98129	0.470366	47.807	13.0525	Salzburg	NULL	NULL	/images/id_3183_400_300.jpg
61	4.94773	0.559714	4.55327	0.77409	4.85081	0.533097	40.6007	-73.9939	New York City	194	-1	/images/id_61_400_300.jpg
62	3.67526	0.324282	3.18775	0.267619	4.70971	0.555733	40.657	-73.9802	New York City	235	2	/images/id_62_400_300.jpg
3006	5.25268	0.429309	4.70752	0.633676	6.53333	0.348576	47.803	13.0112	Salzburg	NULL	NULL	/images/id_3006_400_300.jpg
3001	3.96082	0.465707	5.17698	0.603111	4.07556	0.493996	47.8015	13.015	Salzburg	NULL	NULL	/images/id_3001_400_300.jpg
3000	3.27943	0.32147	3.93491	0.551555	2.76087	0.362638	47.8015	13.015	Salzburg	NULL	NULL	/images/id_3000_400_300.jpg
4899	5.91678	0.63849	4.35703	0.704118	5.70223	0.554452	42.3372	-71.0944	Boston	81	-2	/images/id_4899_400_300.jpg
4898	2.47738	0.477218	2.5934	0.619865	1.99521	0.409502	42.3163	-71.0827	Boston	323	-1	/images/id_4898_400_300.jpg
3003	4.09734	0.359843	4.30978	0.539099	3.34329	0.39122	47.8037	13.0097	Salzburg	NULL	NULL	/images/id_3003_400_300.jpg
4893	6.54048	0.572095	6.00045	0.71402	5.54892	0.632128	42.3176	-71.0744	Boston	331	1	/images/id_4893_400_300.jpg
4892	7.63453	0.51212	5.47121	0.832344	8.35982	0.542113	42.3338	-71.1308	Boston	186	-4	/images/id_4892_400_300.jpg
4891	6.32647	0.512468	4.80533	0.713111	7.4574	0.477327	42.3438	-71.0704	Boston	279	-4	/images/id_4891_400_300.jpg
4890	6.38643	0.512184	4.03802	0.685185	4.72931	0.621181	42.3492	-71.1155	Boston	304	5	/images/id_4890_400_300.jpg
4897	6.8199	0.524919	4.99771	0.814404	7.08672	0.679818	42.3104	-71.1182	Boston	302	1	/images/id_4897_400_300.jpg
4896	2.75216	0.500898	5.00116	0.654618	5.17961	0.510622	42.3539	-71.0498	Boston	286	11	/images/id_4896_400_300.jpg
4895	2.71887	0.490329	1.8744	0.5507	0.737403	0.619094	42.3547	-71.1434	Boston	353	1	/images/id_4895_400_300.jpg
4894	1.15993	0.512684	2.8402	0.784399	0.804407	0.55232	42.3388	-71.043	Boston	7	-2	/images/id_4894_400_300.jpg
4136	4.24861	0.550508	3.94701	0.70805	4.05489	0.658318	40.6541	-73.9422	New York City	26	0	/images/id_4136_400_300.jpg
1401	5.52573	0.527617	6.5849	0.629878	5.92534	0.57045	42.3505	-71.1226	Boston	173	4	/images/id_1401_400_300.jpg
312	3.85765	0.41858	4.7241	0.799706	4.10704	0.501692	40.7406	-73.9737	New York City	148	7	/images/id_312_400_300.jpg
1858	3.38534	0.261422	3.98572	0.541067	5.41429	0.577193	48.275	14.3078	Linz	NULL	NULL	/images/id_1858_400_300.jpg
1859	4.2891	0.500783	3.51641	0.59027	4.94077	0.465586	48.2748	14.3092	Linz	NULL	NULL	/images/id_1859_400_300.jpg
4419	3.13967	0.523055	4.65352	0.746851	3.72987	0.621313	42.3588	-71.1085	Boston	352	11	/images/id_4419_400_300.jpg
4418	4.5386	0.519626	2.10068	0.801031	3.24554	0.49291	42.3784	-71.0608	Boston	340	12	/images/id_4418_400_300.jpg
4417	2.99596	0.63827	6.4589	0.646608	5.56275	0.607934	42.3477	-71.0451	Boston	163	9	/images/id_4417_400_300.jpg
1851	3.92419	0.484715	4.69241	0.712955	3.94816	0.406238	48.2742	14.3052	Linz	NULL	NULL	/images/id_1851_400_300.jpg
4415	3.99111	0.621122	2.85189	0.633388	2.90841	0.491456	42.3656	-71.0365	Boston	348	12	/images/id_4415_400_300.jpg
1853	4.55162	0.489986	5.49105	0.579327	5.14618	0.649439	48.2742	14.3052	Linz	NULL	NULL	/images/id_1853_400_300.jpg
1854	5.66297	0.422783	4.90603	0.612263	4.80194	0.595487	48.2742	14.3058	Linz	NULL	NULL	/images/id_1854_400_300.jpg
1855	5.59625	0.486971	4.12238	0.551977	5.37378	0.474861	48.2743	14.3068	Linz	NULL	NULL	/images/id_1855_400_300.jpg
1856	4.51992	0.497652	4.29291	0.714574	4.44624	0.51003	48.275	14.3078	Linz	NULL	NULL	/images/id_1856_400_300.jpg
1857	4.12339	0.463431	4.11811	0.631036	4.34969	0.506808	48.275	14.3078	Linz	NULL	NULL	/images/id_1857_400_300.jpg
2172	3.79389	0.358028	4.29846	0.722604	3.75855	0.405933	48.3122	14.281	Linz	NULL	NULL	/images/id_2172_400_300.jpg
2173	4.19976	0.506693	4.56231	0.633822	3.57914	0.380231	48.3122	14.281	Linz	NULL	NULL	/images/id_2173_400_300.jpg
2170	3.49515	0.380774	5.04048	0.698575	3.92793	0.425102	48.3132	14.2783	Linz	NULL	NULL	/images/id_2170_400_300.jpg
2171	5.23916	0.494962	6.67671	0.590086	5.20486	0.601843	48.3132	14.2785	Linz	NULL	NULL	/images/id_2171_400_300.jpg
2176	4.63234	0.478482	4.09513	0.628302	4.89413	0.498021	48.3105	14.2773	Linz	NULL	NULL	/images/id_2176_400_300.jpg
918	5.80406	0.468647	4.84246	0.762771	6.18036	0.521719	42.3427	-71.1039	Boston	114	2	/images/id_918_400_300.jpg
2174	3.51383	0.395021	5.03839	0.72299	3.9079	0.476518	48.312	14.2805	Linz	NULL	NULL	/images/id_2174_400_300.jpg
2175	4.50861	0.56956	3.97401	0.481045	4.1939	0.633039	48.3107	14.2777	Linz	NULL	NULL	/images/id_2175_400_300.jpg
247	5.28072	0.465036	4.98442	0.756595	3.94425	0.548121	40.7741	-73.9808	New York City	147	1	/images/id_247_400_300.jpg
914	4.63353	0.506839	3.87806	0.505548	4.01642	0.36512	42.3721	-71.0959	Boston	184	5	/images/id_914_400_300.jpg
917	5.12997	0.481985	4.33705	0.672712	5.96944	0.498934	42.3806	-71.1136	Boston	200	8	/images/id_917_400_300.jpg
916	5.66997	0.491359	5.91654	0.656604	6.04056	0.590839	42.3366	-71.0284	Boston	127	0	/images/id_916_400_300.jpg
911	3.46466	0.382695	3.63762	0.560984	3.98664	0.462186	40.6717	-73.8634	New York City	151	5	/images/id_911_400_300.jpg
910	4.53092	0.522963	4.10644	0.670426	4.89055	0.727761	40.7649	-73.9571	New York City	155	11	/images/id_910_400_300.jpg
913	4.8354	0.491581	4.80099	0.742367	5.35637	0.599964	42.3608	-71.0881	Boston	288	5	/images/id_913_400_300.jpg
912	3.66746	0.385962	3.76157	0.52546	3.30252	0.282027	40.7995	-73.9099	New York City	190	6	/images/id_912_400_300.jpg
1421	5.00731	0.576235	4.1917	0.650601	5.70235	0.549627	42.3849	-71.0805	Boston	162	15	/images/id_1421_400_300.jpg
516	3.27535	0.348296	3.52865	0.531183	3.19463	0.360579	40.6977	-73.9357	New York City	76	2	/images/id_516_400_300.jpg
3261	4.1758	0.458974	4.82682	0.675436	4.98199	0.52024	47.8098	13.033	Salzburg	NULL	NULL	/images/id_3261_400_300.jpg
1932	5.57059	0.491452	4.84902	0.851634	5.57849	0.565557	48.2863	14.3042	Linz	NULL	NULL	/images/id_1932_400_300.jpg
1931	5.21307	0.431096	4.03638	0.795883	5.02601	0.61141	48.2853	14.3025	Linz	NULL	NULL	/images/id_1931_400_300.jpg
3262	4.95627	0.427156	4.59548	0.654813	4.84627	0.628318	47.809	13.033	Salzburg	NULL	NULL	/images/id_3262_400_300.jpg
1937	5.57893	0.447436	4.75189	0.754421	5.0281	0.564232	48.2872	14.304	Linz	NULL	NULL	/images/id_1937_400_300.jpg
1936	5.36596	0.508761	4.62349	0.647982	5.04949	0.427081	48.2853	14.3038	Linz	NULL	NULL	/images/id_1936_400_300.jpg
1935	3.19291	0.283972	2.57674	0.38158	3.37997	0.37115	48.2858	14.3063	Linz	NULL	NULL	/images/id_1935_400_300.jpg
3266	5.70247	0.435202	6.32331	0.554735	5.52665	0.436261	47.809	13.0275	Salzburg	NULL	NULL	/images/id_3266_400_300.jpg
3269	5.64364	0.462789	5.93208	0.571678	4.04815	0.49191	47.8103	13.0263	Salzburg	NULL	NULL	/images/id_3269_400_300.jpg
3268	4.13589	0.416049	4.43814	0.65711	5.04386	0.543776	47.809	13.0272	Salzburg	NULL	NULL	/images/id_3268_400_300.jpg
1939	3.81405	0.381216	3.58006	0.568048	4.3947	0.549472	48.2877	14.3048	Linz	NULL	NULL	/images/id_1939_400_300.jpg
1938	4.26071	0.44616	4.24046	0.831826	4.31229	0.443379	48.2872	14.3042	Linz	NULL	NULL	/images/id_1938_400_300.jpg
3369	6.66089	0.402	7.24967	0.564529	6.07624	0.475745	47.822	13.0138	Salzburg	NULL	NULL	/images/id_3369_400_300.jpg
847	5.17022	0.5407	4.77738	0.67952	4.62422	0.508748	40.584	-73.9699	New York City	108	0	/images/id_847_400_300.jpg
3466	5.3737	0.435701	5.13414	0.594864	4.71885	0.600871	47.8132	13.0678	Salzburg	NULL	NULL	/images/id_3466_400_300.jpg
3465	3.4183	0.39511	5.43552	0.669352	4.32052	0.503991	47.8098	13.0642	Salzburg	NULL	NULL	/images/id_3465_400_300.jpg
3464	4.17038	0.439027	4.16304	0.593096	4.44489	0.607889	47.8083	13.0658	Salzburg	NULL	NULL	/images/id_3464_400_300.jpg
3463	4.72263	0.497588	4.02523	0.645382	3.69576	0.499465	47.8	13.0645	Salzburg	NULL	NULL	/images/id_3463_400_300.jpg
3462	5.90481	0.405734	6.76989	0.623185	5.75546	0.429945	47.7968	13.0517	Salzburg	NULL	NULL	/images/id_3462_400_300.jpg
3461	6.40366	0.441038	6.81004	0.576258	6.36088	0.482326	47.7993	13.0552	Salzburg	NULL	NULL	/images/id_3461_400_300.jpg
840	6.53687	0.418074	5.40318	0.808509	6.31207	0.561874	40.7157	-73.8386	New York City	174	7	/images/id_840_400_300.jpg
4277	7.08121	0.495063	6.77211	0.788866	7.30426	0.562594	40.7945	-73.951	New York City	341	9	/images/id_4277_400_300.jpg
1090	5.53292	0.40672	5.40112	0.753	6.42388	0.544832	42.3328	-71.1373	Boston	274	-2	/images/id_1090_400_300.jpg
1426	5.65903	0.525779	4.92772	0.816507	4.90378	0.584906	42.3086	-71.0506	Boston	163	11	/images/id_1426_400_300.jpg
849	5.6568	0.467329	5.65487	0.69892	5.57205	0.506247	40.7309	-73.9875	New York City	162	11	/images/id_849_400_300.jpg
3468	4.72316	0.452064	5.69577	0.741617	5.75369	0.55482	47.815	13.07	Salzburg	NULL	NULL	/images/id_3468_400_300.jpg
3364	4.84814	0.471622	5.50835	0.823839	5.6262	0.546324	47.8185	13.0103	Salzburg	NULL	NULL	/images/id_3364_400_300.jpg
3365	5.40221	0.42637	5.7268	0.643859	5.55617	0.492567	47.8193	13.0097	Salzburg	NULL	NULL	/images/id_3365_400_300.jpg
459	4.24052	0.434215	5.26841	0.63821	3.80963	0.441406	40.8678	-73.93	New York City	346	8	/images/id_459_400_300.jpg
3460	4.39921	0.460046	4.9501	0.614755	4.2474	0.485056	47.7847	13.0718	Salzburg	NULL	NULL	/images/id_3460_400_300.jpg
3367	5.70293	0.397391	4.41135	0.552795	6.39535	0.551126	47.821	13.0148	Salzburg	NULL	NULL	/images/id_3367_400_300.jpg
4905	6.96516	0.547904	6.19001	0.738436	6.73199	0.573148	42.3423	-71.0815	Boston	281	0	/images/id_4905_400_300.jpg
1739	4.18214	0.436492	4.20647	0.561721	5.01358	0.629112	48.2722	14.2817	Linz	NULL	NULL	/images/id_1739_400_300.jpg
1738	4.71834	0.493778	5.03254	0.539884	5.12776	0.585862	48.2722	14.2817	Linz	NULL	NULL	/images/id_1738_400_300.jpg
3702	3.64152	0.612644	3.82316	0.727854	3.82721	0.667298	40.7446	-73.9078	New York City	338	4	/images/id_3702_400_300.jpg
1731	5.17177	0.502748	4.51059	0.673395	5.65431	0.53835	48.274	14.2793	Linz	NULL	NULL	/images/id_1731_400_300.jpg
1730	5.62978	0.509545	5.25339	0.671353	6.44631	0.369373	48.2748	14.2797	Linz	NULL	NULL	/images/id_1730_400_300.jpg
1733	4.73294	0.453862	4.95001	0.651949	5.69623	0.652283	48.2715	14.2787	Linz	NULL	NULL	/images/id_1733_400_300.jpg
1732	5.87107	0.421354	5.60502	0.734659	6.29972	0.482893	48.2715	14.2787	Linz	NULL	NULL	/images/id_1732_400_300.jpg
1735	5.40947	0.456812	4.00178	0.63132	6.64519	0.459647	48.2722	14.2807	Linz	NULL	NULL	/images/id_1735_400_300.jpg
1734	5.09656	0.492985	5.37518	0.668423	5.71281	0.617889	48.2707	14.2802	Linz	NULL	NULL	/images/id_1734_400_300.jpg
1736	5.62079	0.465719	5.33401	0.592302	5.3657	0.480749	48.2722	14.2807	Linz	NULL	NULL	/images/id_1736_400_300.jpg
499	3.96926	0.406224	4.49336	0.659218	3.96441	0.401815	40.6275	-73.9152	New York City	158	8	/images/id_499_400_300.jpg
732	4.35304	0.459665	4.45655	0.510513	4.02054	0.47433	40.6807	-73.8501	New York City	308	2	/images/id_732_400_300.jpg
1220	3.51081	0.376104	3.55237	0.503769	3.0402	0.415095	42.3816	-71.0799	Boston	230	-1	/images/id_1220_400_300.jpg
796	4.86415	0.546175	5.52466	0.521767	4.66904	0.645501	40.8249	-73.9517	New York City	172	6	/images/id_796_400_300.jpg
753	3.89487	0.458512	4.9699	0.540052	3.93899	0.425572	40.8018	-73.9611	New York City	151	24	/images/id_753_400_300.jpg
752	3.24282	0.317815	3.62083	0.500198	NULL	NULL	40.6943	-73.9293	New York City	170	5	/images/id_752_400_300.jpg
751	6.02924	0.443443	5.41688	0.657069	6.35982	0.421885	40.7998	-73.9702	New York City	144	-2	/images/id_751_400_300.jpg
750	3.39468	0.388515	3.50356	0.500531	3.03389	0.11773	40.7211	-73.9167	New York City	144	5	/images/id_750_400_300.jpg
757	5.57288	0.47833	4.28891	0.659245	4.03351	0.474944	40.704	-73.8297	New York City	192	8	/images/id_757_400_300.jpg
756	5.11954	0.57154	4.59336	0.739479	6.20593	0.427318	40.6982	-73.8467	New York City	197	12	/images/id_756_400_300.jpg
755	6.05516	0.410113	4.27612	0.622886	5.10826	0.630981	40.7625	-73.9297	New York City	164	9	/images/id_755_400_300.jpg
754	5.21413	0.49518	4.35461	0.731155	4.51989	0.595057	40.7336	-73.8805	New York City	180	7	/images/id_754_400_300.jpg
759	3.66761	0.399178	4.32006	0.621024	3.01522	0.34433	40.6104	-73.9233	New York City	288	5	/images/id_759_400_300.jpg
758	3.69159	0.376301	3.85486	0.471367	3.49546	0.480913	40.6234	-73.9864	New York City	160	6	/images/id_758_400_300.jpg
1805	5.15596	0.604439	5.79705	0.65811	5.43826	0.527246	48.2688	14.2887	Linz	NULL	NULL	/images/id_1805_400_300.jpg
3070	5.94067	0.484766	4.8438	0.697682	6.65762	0.478033	47.7923	13.0677	Salzburg	NULL	NULL	/images/id_3070_400_300.jpg
3071	3.89705	0.304189	4.22117	0.635338	3.92789	0.541353	47.7923	13.0677	Salzburg	NULL	NULL	/images/id_3071_400_300.jpg
3072	4.48504	0.371263	4.93086	0.630462	5.07876	0.456706	47.7923	13.0677	Salzburg	NULL	NULL	/images/id_3072_400_300.jpg
3073	5.54235	0.468131	5.72578	0.554019	5.92833	0.45518	47.7925	13.0693	Salzburg	NULL	NULL	/images/id_3073_400_300.jpg
3074	5.74449	0.418923	3.68686	0.60144	5.37783	0.518538	47.7925	13.0693	Salzburg	NULL	NULL	/images/id_3074_400_300.jpg
2959	5.92216	0.469012	5.50505	0.620259	4.91586	0.56546	47.7893	13.0743	Salzburg	NULL	NULL	/images/id_2959_400_300.jpg
3076	4.29742	0.525041	4.55565	0.742219	5.2225	0.581698	47.7942	13.0678	Salzburg	NULL	NULL	/images/id_3076_400_300.jpg
3077	4.03649	0.411214	5.83098	0.742981	6.25501	0.452127	47.7957	13.0648	Salzburg	NULL	NULL	/images/id_3077_400_300.jpg
2954	5.29513	0.621564	6.11723	0.737287	6.13162	0.464949	47.7932	13.081	Salzburg	NULL	NULL	/images/id_2954_400_300.jpg
3786	4.07507	0.57242	5.35933	0.862207	3.58279	0.674957	40.888	-73.905	New York City	341	1	/images/id_3786_400_300.jpg
2956	4.09674	0.491004	4.38572	0.614286	4.37725	0.466053	47.7942	13.0737	Salzburg	NULL	NULL	/images/id_2956_400_300.jpg
2957	5.1734	0.535528	4.85914	0.744332	4.75608	0.490112	47.7938	13.0728	Salzburg	NULL	NULL	/images/id_2957_400_300.jpg
2950	4.1789	0.377257	4.53549	0.534959	4.6651	0.545376	47.797	13.0738	Salzburg	NULL	NULL	/images/id_2950_400_300.jpg
2951	4.35697	0.515688	4.29123	0.585657	4.63685	0.504114	47.7988	13.0752	Salzburg	NULL	NULL	/images/id_2951_400_300.jpg
2952	6.17239	0.476919	4.95447	0.759992	6.51099	0.457457	47.8025	13.0785	Salzburg	NULL	NULL	/images/id_2952_400_300.jpg
2953	5.17724	0.556409	5.67078	0.627493	6.23166	0.552989	47.7978	13.08	Salzburg	NULL	NULL	/images/id_2953_400_300.jpg
1025	4.98946	0.474846	3.76177	0.541687	5.41832	0.56192	42.32	-71.0589	Boston	51	0	/images/id_1025_400_300.jpg
1024	5.9813	0.454396	6.45033	0.601631	6.34637	0.544903	42.3826	-71.1145	Boston	121	-1	/images/id_1024_400_300.jpg
1027	4.38617	0.40057	3.73426	0.541038	5.73037	0.642679	42.3632	-71.1056	Boston	174	0	/images/id_1027_400_300.jpg
1026	6.03631	0.409716	5.92208	0.72968	5.29443	0.485079	42.288	-71.0518	Boston	242	1	/images/id_1026_400_300.jpg
1021	4.82915	0.541279	4.18537	0.882494	4.46661	0.483298	42.3931	-71.1145	Boston	156	2	/images/id_1021_400_300.jpg
3784	1.72269	0.498551	1.18259	0.76909	2.95142	0.662642	40.6779	-73.9182	New York City	217	5	/images/id_3784_400_300.jpg
1023	4.21664	0.439554	4.73515	0.829351	5.58196	0.537579	42.2959	-71.0581	Boston	222	7	/images/id_1023_400_300.jpg
1022	5.04312	0.442515	4.22685	0.627355	4.39242	0.513165	42.3655	-71.0611	Boston	252	5	/images/id_1022_400_300.jpg
502	3.74471	0.383578	2.64512	0.312989	3.8774	0.43615	40.5799	-73.9696	New York City	280	6	/images/id_502_400_300.jpg
3785	4.29809	0.515271	3.87578	0.597572	5.31327	0.674617	40.7379	-73.9037	New York City	219	-2	/images/id_3785_400_300.jpg
1029	6.21341	0.484365	4.85261	0.690353	5.94124	0.49564	42.3212	-71.0741	Boston	220	2	/images/id_1029_400_300.jpg
1028	4.8295	0.40328	5.35966	0.65519	6.03588	0.524656	42.3305	-71.0747	Boston	58	-4	/images/id_1028_400_300.jpg
503	3.4926	0.371074	3.99123	0.419007	3.47214	0.405126	40.8015	-73.9415	New York City	189	1	/images/id_503_400_300.jpg
500	4.73857	0.467897	4.59845	0.811974	4.96218	0.535836	40.6742	-73.9538	New York City	159	7	/images/id_500_400_300.jpg
1035	4.74307	0.526952	5.9057	0.663371	4.08866	0.61433	42.3783	-71.0531	Boston	242	4	/images/id_1035_400_300.jpg
605	6.35502	0.328466	5.03539	0.812259	6.68431	0.448921	40.7571	-73.962	New York City	145	5	/images/id_605_400_300.jpg
630	3.62332	0.41468	3.38697	0.439671	3.82285	0.574898	40.6515	-73.8379	New York City	194	6	/images/id_630_400_300.jpg
4367	5.46925	0.543967	4.59405	0.717593	5.03	0.658561	42.3755	-71.102	Boston	10	8	/images/id_4367_400_300.jpg
4366	6.72655	0.533817	5.42321	0.747644	7.42523	0.570833	42.3389	-71.0546	Boston	358	3	/images/id_4366_400_300.jpg
4361	5.29061	0.462933	6.19631	0.819155	5.55605	0.612068	42.2928	-71.0763	Boston	303	0	/images/id_4361_400_300.jpg
1807	5.02124	0.564261	5.67363	0.766352	6.83789	0.450879	48.2687	14.2907	Linz	NULL	NULL	/images/id_1807_400_300.jpg
603	4.97373	0.534545	4.49525	0.726528	6.63017	0.45299	40.6664	-73.9647	New York City	181	5	/images/id_603_400_300.jpg
631	4.88063	0.52467	5.6833	0.631557	5.9807	0.498947	40.7371	-73.9814	New York City	184	12	/images/id_631_400_300.jpg
1205	4.77858	0.53379	5.45741	0.738667	5.05207	0.657797	42.3166	-71.0625	Boston	167	2	/images/id_1205_400_300.jpg
1204	3.20608	0.32589	5.23755	0.821746	3.78894	0.325678	42.2909	-71.0776	Boston	279	-2	/images/id_1204_400_300.jpg
1207	5.17291	0.511045	5.78527	0.759885	4.67093	0.468393	42.4047	-71.1259	Boston	268	8	/images/id_1207_400_300.jpg
1206	4.17271	0.509879	4.57212	0.813958	3.56065	0.374643	42.3872	-71.0448	Boston	25	8	/images/id_1206_400_300.jpg
609	5.88281	0.413874	5.77173	0.640697	5.77133	0.560082	40.7728	-73.9584	New York City	197	5	/images/id_609_400_300.jpg
1200	4.82392	0.522626	5.24555	0.565221	4.99148	0.593982	42.3094	-71.1078	Boston	243	6	/images/id_1200_400_300.jpg
1203	6.09891	0.391841	5.80242	0.790129	5.99255	0.473069	42.2946	-71.0575	Boston	208	7	/images/id_1203_400_300.jpg
1202	3.99998	0.418653	3.90392	0.585872	4.2564	0.535408	42.3472	-71.0658	Boston	172	3	/images/id_1202_400_300.jpg
1358	5.69801	0.496632	5.10022	0.660495	4.78702	0.576282	42.34	-71.1185	Boston	81	5	/images/id_1358_400_300.jpg
634	4.71602	0.474138	4.51837	0.687347	3.64631	0.368811	40.7988	-73.934	New York City	156	6	/images/id_634_400_300.jpg
635	5.36716	0.482607	5.64358	0.524104	4.894	0.570436	40.7326	-73.9917	New York City	146	5	/images/id_635_400_300.jpg
3108	4.10424	0.468908	3.89053	0.62711	3.34442	0.405641	47.8078	13.043	Salzburg	NULL	NULL	/images/id_3108_400_300.jpg
3109	5.32291	0.492275	4.69746	0.748691	4.48336	0.538175	47.8078	13.043	Salzburg	NULL	NULL	/images/id_3109_400_300.jpg
2003	4.69726	0.499565	5.58255	0.838709	4.88685	0.62307	48.3058	14.3042	Linz	NULL	NULL	/images/id_2003_400_300.jpg
3104	5.12146	0.511633	4.59202	0.586657	5.02693	0.598299	47.8072	13.0405	Salzburg	NULL	NULL	/images/id_3104_400_300.jpg
3105	6.08409	0.380365	6.25541	0.594444	6.21354	0.535325	47.8073	13.0412	Salzburg	NULL	NULL	/images/id_3105_400_300.jpg
3106	5.26507	0.548345	5.95275	0.584742	5.17475	0.533367	47.8073	13.0412	Salzburg	NULL	NULL	/images/id_3106_400_300.jpg
3107	5.18769	0.483729	5.00887	0.772048	6.47354	0.40784	47.8078	13.043	Salzburg	NULL	NULL	/images/id_3107_400_300.jpg
3100	5.5732	0.508162	5.1083	0.834263	6.73104	0.391911	47.8035	13.042	Salzburg	NULL	NULL	/images/id_3100_400_300.jpg
3101	5.17447	0.428602	4.39355	0.622975	5.43475	0.522227	47.8042	13.04	Salzburg	NULL	NULL	/images/id_3101_400_300.jpg
3102	5.31827	0.466627	5.87583	0.593709	4.47029	0.510395	47.805	13.0397	Salzburg	NULL	NULL	/images/id_3102_400_300.jpg
3103	6.28525	0.395875	5.65257	0.726179	6.74061	0.451972	47.805	13.0397	Salzburg	NULL	NULL	/images/id_3103_400_300.jpg
1447	5.64407	0.49309	5.74499	0.692619	4.51677	0.447198	42.3065	-71.0722	Boston	174	3	/images/id_1447_400_300.jpg
1446	5.96584	0.372276	4.88724	0.667099	6.21367	0.641878	42.3774	-71.0563	Boston	146	1	/images/id_1446_400_300.jpg
1113	5.68615	0.503384	6.30727	0.552749	5.90824	0.819387	42.3514	-71.1297	Boston	154	-2	/images/id_1113_400_300.jpg
1444	5.91758	0.357709	6.47358	0.740865	6.45029	0.469949	42.2965	-71.0671	Boston	146	6	/images/id_1444_400_300.jpg
5	4.2912	0.453086	6.8789	0.486847	5.78894	0.588654	42.3707	-71.0615	Boston	186	8	/images/id_5_400_300.jpg
1442	6.67613	0.306101	4.71478	0.581596	5.748	0.529506	42.3113	-71.0645	Boston	186	6	/images/id_1442_400_300.jpg
1117	4.60893	0.468486	3.60671	0.43041	5.58844	0.515729	42.3367	-71.1351	Boston	201	2	/images/id_1117_400_300.jpg
1440	4.74685	0.418608	3.05747	0.445898	4.46033	0.624124	42.3707	-71.0439	Boston	137	6	/images/id_1440_400_300.jpg
1119	4.26919	0.393494	4.45457	0.671526	4.74519	0.482793	42.3968	-71.0894	Boston	135	2	/images/id_1119_400_300.jpg
1118	4.99744	0.493173	5.71068	0.613928	5.12277	0.66352	42.2896	-71.0872	Boston	159	1	/images/id_1118_400_300.jpg
1351	3.69186	0.396679	4.25978	0.690337	4.71788	0.561612	42.3923	-71.0987	Boston	188	10	/images/id_1351_400_300.jpg
1449	5.38661	0.470523	6.3059	0.534394	6.14632	0.387617	42.3339	-71.1071	Boston	153	1	/images/id_1449_400_300.jpg
1448	2.92646	0.287817	4.1302	0.557517	2.68787	0.295091	42.403	-71.0627	Boston	222	1	/images/id_1448_400_300.jpg
4093	5.02335	0.548653	3.66736	0.749711	5.55519	0.633059	40.8768	-73.9086	New York City	278	5	/images/id_4093_400_300.jpg
4092	4.127	0.534598	4.95564	0.785358	3.99554	0.622922	40.8086	-73.9129	New York City	333	14	/images/id_4092_400_300.jpg
4091	3.00642	0.426527	5.25367	0.859369	2.78317	0.549213	40.619	-73.9254	New York City	235	3	/images/id_4091_400_300.jpg
4278	4.34759	0.527093	5.04707	0.741698	4.72826	0.607522	40.6996	-73.8446	New York City	204	-1	/images/id_4278_400_300.jpg
4097	5.47952	0.581272	4.42419	0.688897	5.49514	0.593269	40.8315	-73.8226	New York City	14	-1	/images/id_4097_400_300.jpg
2004	5.63421	0.428498	5.71863	0.557356	4.44919	0.421319	48.3078	14.3038	Linz	NULL	NULL	/images/id_2004_400_300.jpg
4095	1.72664	0.394647	2.80155	0.77619	1.65308	0.470835	40.7249	-73.9555	New York City	21	2	/images/id_4095_400_300.jpg
4094	1.18388	0.450869	3.6716	0.802603	2.14319	0.442876	40.6804	-73.8819	New York City	36	3	/images/id_4094_400_300.jpg
461	4.905	0.639161	4.4065	0.697657	4.99608	0.637017	40.6287	-73.8994	New York City	182	2	/images/id_461_400_300.jpg
4099	6.79859	0.566988	3.89998	0.690814	5.86619	0.536093	40.7236	-73.8747	New York City	14	2	/images/id_4099_400_300.jpg
4858	7.02545	0.538762	7.33499	0.738804	8.98636	0.647038	42.2937	-71.0703	Boston	25	5	/images/id_4858_400_300.jpg
4826	2.33233	0.513446	2.92242	0.71387	3.42358	0.513997	42.3553	-71.1456	Boston	339	13	/images/id_4826_400_300.jpg
4857	6.50221	0.536744	5.09533	0.766262	7.33339	0.616519	42.2899	-71.0694	Boston	336	10	/images/id_4857_400_300.jpg
1355	5.88622	0.518442	6.6712	0.604198	6.65244	0.486298	42.3577	-71.0719	Boston	225	9	/images/id_1355_400_300.jpg
489	5.05289	0.538626	4.95823	0.716625	4.58803	0.58448	40.7287	-73.9816	New York City	181	3	/images/id_489_400_300.jpg
488	3.92365	0.467903	6.45147	0.600242	4.88136	0.524324	40.8605	-73.9272	New York City	176	10	/images/id_488_400_300.jpg
487	3.61416	0.446666	3.95455	0.486895	3.89212	0.395017	40.6791	-73.8345	New York City	176	6	/images/id_487_400_300.jpg
486	3.9897	0.506216	3.69968	0.470639	4.27239	0.518755	40.6662	-73.9496	New York City	110	4	/images/id_486_400_300.jpg
485	5.06381	0.437818	4.45383	0.723245	5.42784	0.611354	40.7388	-73.8816	New York City	214	-4	/images/id_485_400_300.jpg
462	5.77247	0.551593	4.28169	0.591454	3.81989	0.322627	40.8851	-73.9024	New York City	199	5	/images/id_462_400_300.jpg
483	4.11008	0.468296	4.75555	0.793818	3.56471	0.422612	40.6914	-73.8324	New York City	181	5	/images/id_483_400_300.jpg
4587	5.43482	0.496325	3.33324	0.800124	3.30225	0.585195	42.3304	-71.1243	Boston	36	-1	/images/id_4587_400_300.jpg
481	3.43811	0.364079	3.84943	0.567293	3.13568	0.439925	40.7054	-73.8845	New York City	95	4	/images/id_481_400_300.jpg
1804	5.02351	0.512204	3.7328	0.591116	3.94082	0.420203	48.2688	14.2887	Linz	NULL	NULL	/images/id_1804_400_300.jpg
4586	1.56898	0.448704	3.62217	0.700065	2.96978	0.602205	42.2944	-71.0526	Boston	293	2	/images/id_4586_400_300.jpg
4581	5.39432	0.61729	5.91053	0.704853	4.5085	0.538155	42.3565	-71.156	Boston	21	0	/images/id_4581_400_300.jpg
451	6.50278	0.390374	7.08871	0.275827	6.46324	0.411079	40.7642	-73.9747	New York City	152	8	/images/id_451_400_300.jpg
4827	1.06288	0.460464	2.95688	0.655482	1.04849	0.515382	42.3801	-71.0402	Boston	315	3	/images/id_4827_400_300.jpg
4580	5.25225	0.525862	5.9522	0.805152	4.20177	0.531048	42.3373	-71.0346	Boston	59	5	/images/id_4580_400_300.jpg
4583	7.18126	0.492045	5.88597	0.697419	8.40921	0.677932	42.2978	-71.0733	Boston	316	1	/images/id_4583_400_300.jpg
4850	6.67537	0.523998	5.86602	0.737895	6.60011	0.506468	42.2965	-71.0671	Boston	326	6	/images/id_4850_400_300.jpg
1430	5.07052	0.454748	6.11172	0.612501	5.66361	0.613365	42.3494	-71.0638	Boston	236	6	/images/id_1430_400_300.jpg
3922	3.87376	0.516201	3.41317	0.823072	3.52287	0.627553	40.6877	-73.9086	New York City	9	4	/images/id_3922_400_300.jpg
3923	6.26487	0.539218	4.85171	0.745515	5.27079	0.619064	40.7373	-73.9009	New York City	345	4	/images/id_3923_400_300.jpg
3920	2.15776	0.381195	4.17767	0.80348	1.38833	0.627386	40.8015	-73.9415	New York City	9	1	/images/id_3920_400_300.jpg
3921	5.38077	0.537026	5.26673	0.885168	5.71534	0.640433	40.8034	-73.9551	New York City	320	6	/images/id_3921_400_300.jpg
3926	6.61533	0.442546	5.5589	0.625826	5.37312	0.665166	40.8037	-73.9604	New York City	355	2	/images/id_3926_400_300.jpg
3927	5.21308	0.536739	4.39821	0.6086	2.97667	0.526775	40.6282	-74.0251	New York City	326	5	/images/id_3927_400_300.jpg
3924	4.88751	0.549602	4.41808	0.786744	4.14824	0.637559	40.7928	-73.8248	New York City	28	5	/images/id_3924_400_300.jpg
3925	1.91288	0.575553	2.5839	0.642059	0.98808	0.567659	40.6668	-73.9233	New York City	41	-3	/images/id_3925_400_300.jpg
3928	4.92703	0.536484	5.59976	0.64254	3.96359	0.549473	40.7544	-73.9349	New York City	11	2	/images/id_3928_400_300.jpg
3929	4.94928	0.503882	5.26552	0.677637	3.99274	0.511737	40.6387	-73.9998	New York City	343	3	/images/id_3929_400_300.jpg
3993	1.83706	0.547713	2.99984	0.590069	2.04215	0.651556	40.7051	-73.8897	New York City	11	1	/images/id_3993_400_300.jpg
4789	4.47447	0.622022	4.63166	0.747693	4.40005	0.600868	42.3261	-71.0591	Boston	122	3	/images/id_4789_400_300.jpg
4788	5.06606	0.428956	4.28957	0.729046	5.84211	0.654654	42.3504	-71.0775	Boston	12	13	/images/id_4788_400_300.jpg
4787	1.73749	0.48791	2.27515	0.580536	2.27311	0.556217	42.3566	-71.0729	Boston	41	8	/images/id_4787_400_300.jpg
4786	5.28227	0.527388	3.27696	0.772673	4.37294	0.529197	42.3857	-71.0919	Boston	340	2	/images/id_4786_400_300.jpg
4785	4.81321	0.519283	4.10438	0.721932	3.18116	0.641516	42.3477	-71.1493	Boston	5	13	/images/id_4785_400_300.jpg
4784	4.04456	0.484954	4.96922	0.790261	7.33116	0.667918	42.4027	-71.0401	Boston	41	10	/images/id_4784_400_300.jpg
4783	7.71082	0.503354	5.66907	0.785357	7.30364	0.509819	42.3421	-71.0916	Boston	54	7	/images/id_4783_400_300.jpg
4782	3.95596	0.596269	3.9028	0.772813	3.60945	0.675728	42.3544	-71.1456	Boston	1	2	/images/id_4782_400_300.jpg
4781	3.60553	0.580639	2.87763	0.654405	3.47365	0.534375	42.3792	-71.0571	Boston	358	0	/images/id_4781_400_300.jpg
4780	4.78793	0.59623	3.82181	0.825969	5.76928	0.61992	42.3774	-71.1302	Boston	42	3	/images/id_4780_400_300.jpg
4149	1.59269	0.503595	2.27492	0.759587	1.93858	0.484725	40.6679	-73.8732	New York City	27	1	/images/id_4149_400_300.jpg
4148	3.68676	0.539773	4.81588	0.767009	3.93929	0.619893	40.6815	-73.8777	New York City	16	5	/images/id_4148_400_300.jpg
4145	4.95991	0.522214	4.58447	0.77342	4.97291	0.654657	40.704	-73.8809	New York City	13	0	/images/id_4145_400_300.jpg
4144	5.83911	0.455653	5.99874	0.636606	7.11282	0.600657	40.7656	-73.9606	New York City	257	6	/images/id_4144_400_300.jpg
4147	5.23474	0.561437	3.44798	0.713009	4.63363	0.579	40.7112	-73.8624	New York City	18	1	/images/id_4147_400_300.jpg
4146	1.7916	0.497782	1.99316	0.687119	1.50782	0.545659	40.6807	-73.8501	New York City	128	2	/images/id_4146_400_300.jpg
4141	0.952937	0.488671	2.12852	0.691547	1.18561	0.4808	40.6641	-73.871	New York City	124	1	/images/id_4141_400_300.jpg
4140	3.72108	0.544734	4.01759	0.768786	2.91893	0.509141	40.7521	-73.9512	New York City	356	1	/images/id_4140_400_300.jpg
4143	4.27138	0.543389	4.71068	0.728491	3.01962	0.626345	40.7283	-73.8987	New York City	206	4	/images/id_4143_400_300.jpg
4142	6.00354	0.523191	4.19903	0.667076	6.31023	0.635107	40.7556	-73.9239	New York City	7	0	/images/id_4142_400_300.jpg
3856	7.08763	0.560966	5.20202	0.738671	5.90799	0.606789	40.7634	-73.9132	New York City	10	6	/images/id_3856_400_300.jpg
3857	5.64688	0.541666	3.73103	0.848063	2.18835	0.526254	40.7416	-73.9204	New York City	36	-2	/images/id_3857_400_300.jpg
3854	6.15659	0.630705	7.29068	0.630757	6.82253	0.491729	40.8023	-73.9661	New York City	322	5	/images/id_3854_400_300.jpg
3855	4.86618	0.58031	5.42233	0.704654	5.44926	0.630573	40.6463	-74.0063	New York City	334	2	/images/id_3855_400_300.jpg
3852	3.75379	0.576608	2.15502	0.572155	3.67414	0.616295	40.6502	-73.8422	New York City	58	0	/images/id_3852_400_300.jpg
[truncated: 2,137 more rows]
