# Supplementary material for: The Collaborative Image of The City: Mapping the Inequality of Urban Perception
Source: PLOS journal article supplement (doi:10.1371/journal.pone.0068400), 2013-07-24
Supplement: S2 (10.1371/journal.pone.0068400.s002) [file journal.pone.0068400.s002]

(listing pending)
